# Supplementary material for: Transcriptomic Profiling of Various Developmental Stages of Aphis Aurantii to Provide a Genetic Resource for Gene Expression and SSR Analysis
Source: Front Physiol. 2020 Sep 18;11:578939. doi: 10.3389/fphys.2020.578939 (PMC7530277; doi:10.3389/fphys.2020.578939)
Supplement: Supplementary file 2 [file Table_2.xlsx]

## Sheet: Table S1
Table S1. Summary of the sequenced Aphis aurantii transcriptomes for four biological replicates.
Sample	Raw reads	Clean reads	Clean bases (G)	Error (%)	Q20 (%)	GC content (%)
N1_1	49838344	48630910	7.29	0.03	97.6	36.58
N1_2	41972590	41055318	6.16	0.03	97.69	37.65
N1_3	51736506	50566592	7.58	0.03	97.4	37.15
N1_4	53705158	52343790	7.85	0.03	97.79	36.72
N2_1	44918054	43631278	6.54	0.03	97.52	36.08
N2_2	42502610	41481990	6.22	0.03	97.45	35.94
N2_3	55410964	54051852	8.11	0.03	97.16	35.84
N2_4	44441844	43204000	6.48	0.03	97.13	35.36
N3_1	62085238	60422962	9.06	0.03	97.52	36.72
N3_2	54718308	53376504	8.01	0.03	97.87	36.49
N3_3	62810818	61297610	9.19	0.03	97.82	35.72
N3_4	49987338	48824858	7.32	0.03	97.65	37.06
N4_1	44483794	43105432	6.47	0.03	97.56	35.66
N4_2	42517838	41068430	6.16	0.03	97.61	36.34
N4_3	47938938	46620612	6.99	0.03	97.74	35.17
N4_4	53093724	51615258	7.74	0.03	97.59	34.98
AW_1	55109390	53081098	7.96	0.03	97.25	35.02
AW_2	45224686	43883272	6.58	0.03	97.29	35.06
AW_3	53421370	51760412	7.76	0.03	97.42	35.9
AW_4	49417976	47311068	7.1	0.03	97.53	34.68
AY_1	41620856	40109050	6.02	0.03	97.54	33.84
AY_2	49243532	47306148	7.1	0.03	97.55	34.06
AY_3	40985882	39523910	5.93	0.03	97.54	33.83
AY_4	51930464	50046444	7.51	0.03	97.79	33.89

## Sheet: Table S2
Table S2. Differentially expressed unigenes in the molting processes.
Unigene_ID	FPKM_N1	FPKM_N2	FPKM_N3	FPKM_N4	FPKM_AW	Sig. (N1vsN2)	Sig. (N2vsN3)	Sig. N3vsN4)	Sig. (N4vsAW)	NCBI_NR
Cluster-10764.0	17.5225	1.0725	0.65	0.95	0.075	UP	FALSE	FALSE	FALSE	uncharacterized protein LOC111031478
Cluster-13253.0	4.135	1.135	1.805	1.225	0.89	UP	FALSE	FALSE	FALSE	adhesive plaque matrix protein-like
Cluster-13874.0	0.01	0.0425	1.5875	0.0475	0.005	FALSE	FALSE	UP	FALSE	LOW QUALITY PROTEIN: uncharacterized protein LOC101846254
Cluster-14245.0	0.04	0.0175	2.5925	0.07	0.0075	FALSE	DOWN	FALSE	FALSE	uncharacterized protein LOC105230596 isoform X2
Cluster-1425.1	0.59	0.6925	0.01	0.855	0.0925	FALSE	FALSE	DOWN	FALSE	aminopeptidase N
Cluster-15166.0	0.045	0.135	1.7225	0.3375	0.0025	FALSE	FALSE	FALSE	UP	serine..threonine-protein kinase OSR1-like isoform X1
Cluster-15498.0	0.0025	0.3175	3.2975	0.4	0.01	DOWN	FALSE	FALSE	FALSE	F-box only protein 33
Cluster-15750.0	0.3375	1.2125	6.9	1.29	0.5375	DOWN	FALSE	FALSE	FALSE	protein arginine N-methyltransferase 1
Cluster-15883.0	0.02	0.11	2.06	0.3425	0.0025	FALSE	FALSE	FALSE	UP	DDB1- and CUL4-associated factor 8
Cluster-17022.1	0.955	0.6975	0.23	0.2925	0.5625	FALSE	UP	FALSE	FALSE	RNA-directed DNA polymerase from mobile element jockey-like
Cluster-17300.0	0.01	0.1025	1.2725	0.33	0.005	FALSE	FALSE	FALSE	UP	LOW QUALITY PROTEIN: germinal center kinase 1
Cluster-17306.2	0.6975	0.045	0.0425	0.06	0.075	UP	FALSE	FALSE	FALSE	uncharacterized protein LOC107163992
Cluster-18070.0	46.64	15.7425	16.9475	42.81	3.6025	UP	FALSE	FALSE	UP	endocuticle structural glycoprotein SgAbd-4-like
Cluster-18201.0	10.87	3.3025	5.355	5.0725	4.89	UP	FALSE	FALSE	FALSE	ACYPI37181
Cluster-18294.0	0.905	0.01	0.075	0.1525	0.0125	UP	FALSE	FALSE	FALSE	renin receptor
Cluster-18413.0	4.3375	0.16	0	0.2075	0.0325	UP	FALSE	FALSE	FALSE	RING-box protein 1A
Cluster-19122.0	14.12	0.4025	0.395	0.825	0.6025	UP	FALSE	FALSE	FALSE	cytochrome b-c1 complex subunit 9
Cluster-19161.0	0.5625	0.0725	0.0575	0.0225	0.045	UP	FALSE	FALSE	FALSE	integrase core domain protein
Cluster-19282.0	8.3775	0.735	0.5275	1.51	0.205	UP	FALSE	FALSE	FALSE	ACYPI005624
Cluster-20126.0	2.8675	1.5075	1.595	3.37	0.2225	FALSE	FALSE	FALSE	UP	cuticular protein 68 precursor
Cluster-20192.0	4.14	0.2575	0.0975	0.19	0.035	UP	FALSE	FALSE	FALSE	V-type proton ATPase subunit F
Cluster-20498.0	0.5275	0.0175	0.09	0.1175	0	UP	FALSE	FALSE	FALSE	uncharacterized protein LOC107883688
Cluster-20575.0	4.3725	0.405	0.395	1.4975	0.0775	UP	FALSE	FALSE	UP	putative per-hexamer repeat protein 5-like
Cluster-20595.0	4.29	0.1925	0.1325	0.4275	0.0675	UP	FALSE	FALSE	FALSE	cytochrome b-c1 complex subunit 6, mitochondrial
Cluster-21846.0	3.84	0.14	0.3825	0.82	0.0775	UP	FALSE	FALSE	FALSE	chemosensory protein-like precursor
Cluster-21996.0	0.925	0.01	0.035	0.0775	0.0125	UP	FALSE	FALSE	FALSE	flavin reductase
Cluster-22537.0	16.6	5.9125	2.8125	1.825	2.8825	UP	FALSE	FALSE	FALSE	putative cathepsin precursor
Cluster-22872.0	0.045	0.3225	2.75	0.4825	0.01	FALSE	FALSE	FALSE	UP	anaphase-promoting complex subunit 7
Cluster-2294.0	109.308	164.567	259.295	28.3075	7.53	FALSE	FALSE	UP	FALSE	RNA-binding protein 14
Cluster-23014.0	6.7125	3.1225	2.7775	2.74	2.9675	UP	FALSE	FALSE	FALSE	myosuppressin
Cluster-23058.0	4.965	0.89	0.7675	1.1375	1.975	UP	FALSE	FALSE	FALSE	uncharacterized protein LOC107884179
Cluster-23144.0	0.0825	0.2175	0.105	0.1475	0.695	FALSE	FALSE	FALSE	DOWN	lon
Cluster-23181.0	0	0.0225	0.44	0.03	2.5875	FALSE	FALSE	FALSE	DOWN	serine protease SP24D-like
Cluster-23373.0	2.3175	0.3525	1.1975	0.885	1.1825	UP	FALSE	FALSE	FALSE	glucose dehydrogenase
Cluster-23695.0	0.0475	0.1525	1.975	0.345	0.015	FALSE	FALSE	FALSE	UP	myosin heavy chain 95F
Cluster-23708.1	1.5925	0.3875	0.7125	0.6325	1.1775	UP	FALSE	FALSE	FALSE	uncharacterized protein LOC100573905
Cluster-23973.1	0.76	0.53	0.1	0.2175	0.24	FALSE	UP	FALSE	FALSE	uncharacterized protein LOC106636701
Cluster-24159.0	0.9825	0.3075	0.4325	0.51	0.37	UP	FALSE	FALSE	FALSE	uncharacterized protein LOC111041274 isoform X1
Cluster-24273.0	0.0375	0.0725	0.1025	1.23	0.0725	FALSE	FALSE	DOWN	UP	uncharacterized protein LOC107883306 isoform X2
Cluster-24484.0	1.655	2.9075	3.51	0.9925	1.82	FALSE	FALSE	UP	FALSE	probable uridine nucleosidase 1 isoform X1
Cluster-2451.0	0.6375	0	0.0175	0.04	0	UP	FALSE	FALSE	FALSE	protein ZBED8-like
Cluster-24619.0	0.255	0.05	0.115	0.3775	0.495	UP	FALSE	DOWN	FALSE	LOW QUALITY PROTEIN: cilia- and flagella-associated protein 43-like
Cluster-24632.0	1.9525	1.2475	3.01	1.585	1.0725	FALSE	DOWN	FALSE	FALSE	protein D3-like isoform X1
Cluster-24698.0	0.38	0.0575	0.05	0.1775	0.15	UP	FALSE	FALSE	FALSE	putative uncharacterized protein DDB_G0282133
Cluster-24711.0	1.3425	2.6475	2.0975	1.775	1.8675	DOWN	FALSE	FALSE	FALSE	uncharacterized protein LOC111026491
Cluster-24743.1	0.49	0.13	0.1375	0.315	0.355	UP	FALSE	FALSE	FALSE	transmembrane channel-like protein 3 isoform X1
Cluster-25168.0	1.77	3.305	0.0125	1.3825	0.125	FALSE	FALSE	DOWN	FALSE	phospholipase A1-like
Cluster-25344.0	0.0875	0.0925	0.565	1.145	0.6925	FALSE	DOWN	FALSE	FALSE	15-hydroxyprostaglandin dehydrogenase
Cluster-25443.0	1.195	0.375	0.665	0.9375	1.085	UP	FALSE	FALSE	FALSE	uncharacterized protein LOC100574284 isoform X2
Cluster-25621.0	0.145	0.245	0.01	0.245	0.0825	FALSE	FALSE	DOWN	FALSE	cytochrome P450 4C1-like
Cluster-25624.0	0.025	0.4425	0	0.11	0.6175	FALSE	UP	FALSE	FALSE	hypothetical protein RF55_22157, partial
Cluster-26072.0	0.0275	0.385	0.245	0.0375	2.7275	DOWN	FALSE	FALSE	FALSE	opsin Rh1
Cluster-26336.0	1.4075	0.8275	0.3725	1.1025	1.215	FALSE	FALSE	DOWN	FALSE	uncharacterized protein LOC100575196
Cluster-26343.0	5.145	2.115	1.6175	1.98	2.155	UP	FALSE	FALSE	FALSE	skin secretory protein xP2-like
Cluster-26356.0	0.3225	0.72	0.3475	0.385	0.2475	DOWN	FALSE	FALSE	FALSE	serine..arginine-rich SC35-like splicing factor SCL30A
Cluster-26461.0	0.04	0.3175	3.11	0.7975	0.025	FALSE	FALSE	FALSE	UP	BTB..POZ domain-containing protein 10
Cluster-26641.10001	3.6425	1.98	0.8125	1.0375	1.39	FALSE	UP	FALSE	FALSE	adenosine receptor A2b
Cluster-26641.10021	1.115	1.08	0.4475	0.4475	0.605	FALSE	UP	FALSE	FALSE	phosphoserine aminotransferase, partial
Cluster-26641.10031	128.155	46.9375	72.0475	47.545	42.335	UP	FALSE	FALSE	FALSE	RR1 cuticle protein 2 precursor
Cluster-26641.10032	42.335	14.55	21.1075	15.98	14.3425	UP	FALSE	FALSE	FALSE	RR1 cuticle protein 4 precursor
Cluster-26641.10040	0.1975	0.495	10.09	0.9425	6.685	FALSE	DOWN	FALSE	FALSE	transferrin 1
Cluster-26641.10045	1.96	0.6575	0.215	0.265	0.5225	UP	FALSE	FALSE	FALSE	facilitated trehalose transporter Tret1-2 homolog
Cluster-26641.10058	15.2125	14.225	6.4275	5.7875	6.2025	FALSE	UP	FALSE	FALSE	uncharacterized protein LOC100570135 isoform X1
Cluster-26641.10065	2.3425	2.57	5.2375	4.535	4.8225	FALSE	DOWN	FALSE	FALSE	ACYPI31162
Cluster-26641.10095	4.7075	5.3	5.395	2.795	2.4425	FALSE	FALSE	UP	FALSE	farnesol dehydrogenase-like
Cluster-26641.10120	59.335	118.85	111.782	123.948	139.632	DOWN	FALSE	FALSE	FALSE	uncharacterized protein LOC107885212
Cluster-26641.10157	0.3325	2.4825	2.755	2.8075	2.4475	DOWN	FALSE	FALSE	FALSE	protein gooseberry-neuro-like
Cluster-26641.10165	1.145	0.205	0.28	0.3575	0.4875	UP	FALSE	FALSE	FALSE	uncharacterized protein LOC111034376 isoform X2
Cluster-26641.10174	1.235	0.3925	0.765	0.825	0.9975	UP	FALSE	FALSE	FALSE	uncharacterized protein LOC111026367
Cluster-26641.10194	137.725	235.462	158.75	178.07	24.0425	FALSE	FALSE	FALSE	UP	uncharacterized protein LOC111030509
Cluster-26641.10200	13.6175	16.1875	14.37	7.685	7.9125	FALSE	FALSE	UP	FALSE	lysosomal acid phosphatase-like
Cluster-26641.10202	2.4	1.42	2.8625	2.345	1.9425	FALSE	DOWN	FALSE	FALSE	uncharacterized protein LOC110832432 isoform X4
Cluster-26641.10207	7.44	18.8475	25.5	20.0075	20.3825	DOWN	FALSE	FALSE	FALSE	uncharacterized protein LOC111033933
Cluster-26641.10208	60.4875	512.465	828.025	391.423	372.88	DOWN	FALSE	UP	FALSE	uncharacterized protein LOC100168737
Cluster-26641.10240	8.4525	22.63	29.19	23.4225	19.0425	DOWN	FALSE	FALSE	FALSE	RNA-binding protein 1-like isoform X1
Cluster-26641.10341	140.912	57.5825	74.2975	75.6675	72.1325	UP	FALSE	FALSE	FALSE	superoxide dismutase
Cluster-26641.10365	14.6275	4.6825	2.1525	8.21	4.955	UP	FALSE	FALSE	FALSE	glucose dehydrogenase
Cluster-26641.10384	10.3825	20.35	23.1625	20.93	21.3975	DOWN	FALSE	FALSE	FALSE	cyclin-A2
Cluster-26641.10385	17.0125	3.8975	6.36	8.72	5.33	UP	FALSE	FALSE	FALSE	uncharacterized protein LOC106678290
Cluster-26641.10394	5.4225	10.5925	10.0175	8.655	8.84	DOWN	FALSE	FALSE	FALSE	midasin
Cluster-26641.10404	48.3725	35.945	44.95	57.2375	20.0125	FALSE	FALSE	FALSE	UP	glycogen phosphorylase isoform X1
Cluster-26641.10406	3.1475	1.7275	2.4775	3.105	0.94	FALSE	FALSE	FALSE	UP	glycogen phosphorylase
Cluster-26641.10435	1.4825	0.6325	0.4575	0.455	0.5575	UP	FALSE	FALSE	FALSE	uncharacterized protein LOC100166401 isoform X3
Cluster-26641.10440	12.125	15.445	34.88	22.93	19.3625	FALSE	DOWN	FALSE	FALSE	mucin-17 isoform X2
Cluster-26641.10476	3.5	8.22	7.1475	6.66	6.4425	DOWN	FALSE	FALSE	FALSE	uncharacterized protein LOC107167850
Cluster-26641.10491	14.415	29.2125	35.485	37.1575	35.01	DOWN	FALSE	FALSE	FALSE	epithelial chloride channel protein-like
Cluster-26641.10563	14.2525	6.7725	5.28	7.8475	4.16	UP	FALSE	FALSE	FALSE	uncharacterized protein LOC111033164 isoform X1
Cluster-26641.10565	16.8925	8.2375	11.1825	25.41	19.7475	FALSE	FALSE	DOWN	FALSE	uncharacterized protein LOC111034673
Cluster-26641.10568	0.73	1.71	1.7625	1.64	1.5025	DOWN	FALSE	FALSE	FALSE	hypothetical protein FF38_08465
Cluster-26641.10590	1.4925	5.645	31.0425	46.2175	36.9875	DOWN	DOWN	FALSE	FALSE	myrosinase 1-like
Cluster-26641.10616	2.9875	0.37	0.425	0.85	0.03	FALSE	FALSE	FALSE	UP	ATP synthase subunit beta, mitochondrial
Cluster-26641.10658	0.19	1.4525	7.725	9.015	7.91	DOWN	DOWN	FALSE	FALSE	mitogen-activated protein kinase kinase kinase 15-like isoform X1
Cluster-26641.10681	39.5325	12.445	11.26	18.405	5.9725	UP	FALSE	FALSE	UP	ACYPI009803
Cluster-26641.10733	1.73	0.79	0.765	0.7875	1.0075	UP	FALSE	FALSE	FALSE	septin-7 isoform X1
Cluster-26641.10771	2517.75	1258.87	938.913	1460.44	522.543	FALSE	FALSE	FALSE	UP	hypothetical protein Tcan_14442
Cluster-26641.10788	10.665	2.78	2.92	6.2725	6.045	UP	FALSE	FALSE	FALSE	regulator of hypoxia-inducible factor 1
Cluster-26641.10807	40.195	45.4625	101.713	182.765	18.18	FALSE	FALSE	FALSE	UP	repetitive proline-rich cell wall protein 2-like
Cluster-26641.10810	3.925	9.3525	10.9875	11.38	11.5875	DOWN	FALSE	FALSE	FALSE	segmentation protein Runt-like
Cluster-26641.10815	7.305	2.1325	2.685	3.64	1.7025	UP	FALSE	FALSE	UP	alpha-tocopherol transfer protein-like
Cluster-26641.10816	8.3725	4.015	2.495	5.6675	3.0975	UP	FALSE	FALSE	FALSE	alpha-tocopherol transfer protein-like
Cluster-26641.10826	4.9775	10.1075	11.34	10.6225	10.06	DOWN	FALSE	FALSE	FALSE	desert hedgehog protein
Cluster-26641.10836	0.5625	0.5325	2.5425	3.745	2.1725	FALSE	DOWN	FALSE	FALSE	acetyl-coenzyme A transporter 1-like
Cluster-26641.10881	2.555	2.105	4.13	3.97	3.8475	FALSE	DOWN	FALSE	FALSE	irregular chiasm C-roughest protein
Cluster-26641.10893	3.9325	10.3275	16.9725	19	19.4825	DOWN	FALSE	FALSE	FALSE	protein Wnt-2
Cluster-26641.10949	6.575	2.9275	2.32	3.5275	5.205	UP	FALSE	FALSE	FALSE	uncharacterized protein LOC100163038 isoform X5
Cluster-26641.10951	242.355	108.388	75.8375	178.357	60.9325	UP	FALSE	FALSE	UP	repetitive proline-rich cell wall protein 2-like
Cluster-26641.10954	0.3575	0.285	0.6925	2.0625	1.375	FALSE	FALSE	DOWN	FALSE	uncharacterized protein LOC103309618
Cluster-26641.10959	5	2.94	1.825	4.0875	4.995	FALSE	FALSE	DOWN	FALSE	uncharacterized protein LOC111036202 isoform X1
Cluster-26641.10992	1.915	0.0775	0.305	0.455	0.07	UP	FALSE	FALSE	FALSE	CLUMA_CG006906, isoform E
Cluster-26641.10994	22.035	18.5975	9.265	20.5425	26.99	FALSE	FALSE	DOWN	FALSE	calbindin-32
Cluster-26641.11013	64.865	80.7475	118.405	121.328	8.995	FALSE	FALSE	FALSE	UP	skin secretory protein xP2-like
Cluster-26641.11020	12.4825	9.3425	6.4375	14.6225	16.295	FALSE	FALSE	DOWN	FALSE	vesicular glutamate transporter 1-like isoform X2
Cluster-26641.11029	2.1725	5.6225	97.11	98.3975	138.332	FALSE	DOWN	FALSE	FALSE	uncharacterized protein LOC100164166 precursor
Cluster-26641.11042	12.5475	6.6725	9.8075	5.14	5.19	FALSE	FALSE	UP	FALSE	UNC93-like protein
Cluster-26641.11044	31.64	10.4875	8.0075	12.0825	9.5975	UP	FALSE	FALSE	FALSE	proclotting enzyme-like isoform X1
Cluster-26641.11062	2.9875	5.81	7.3	6.435	6.61	DOWN	FALSE	FALSE	FALSE	probable inactive serine..threonine-protein kinase bub1
Cluster-26641.11109	2.3225	1.28	2.5425	3.435	3.6125	FALSE	DOWN	FALSE	FALSE	homeobox protein orthopedia-like
Cluster-26641.11139	77.085	90.365	79.8	40.3525	38.2325	FALSE	FALSE	UP	FALSE	cytochrome b561
Cluster-26641.11147	9.705	20.8175	20.9075	23.2675	22.1375	DOWN	FALSE	FALSE	FALSE	POU domain protein 2-like
Cluster-26641.11159	3.66	1.7375	3.2475	3.6825	4.295	UP	FALSE	FALSE	FALSE	pancreatic triacylglycerol lipase-like
Cluster-26641.11166	533.18	267.882	172.518	319.985	112.542	FALSE	FALSE	FALSE	UP	skin secretory protein xP2-like precursor
Cluster-26641.11186	49.9575	41.3425	30.685	77.765	7.3825	FALSE	FALSE	FALSE	UP	uncharacterized protein LOC111032403
Cluster-26641.11187	20.8925	16.7525	14.0075	35.3425	1.7025	FALSE	FALSE	FALSE	UP	uncharacterized protein LOC100168836
Cluster-26641.11197	1.195	0.89	0.2675	0.3225	0.2225	FALSE	UP	FALSE	FALSE	fatty acid synthase-like
Cluster-26641.11200	3.4625	2.0675	1.1475	4.225	5.2125	FALSE	FALSE	DOWN	FALSE	neprilysin-2
Cluster-26641.11206	39.7925	23.4775	16.7625	42.23	53.8725	FALSE	FALSE	DOWN	FALSE	nanos homolog 1-like
Cluster-26641.11207	532.255	209.61	152.985	207.915	81.88	FALSE	FALSE	FALSE	UP	proline and serine-rich protein 1-like
Cluster-26641.11208	893.042	469.87	282.637	512.205	184.377	FALSE	FALSE	FALSE	UP	hypothetical protein Tcan_14442
Cluster-26641.11225	1.5125	2.015	0.6275	1.8025	2.0975	FALSE	FALSE	DOWN	FALSE	myosin heavy chain, muscle-like
Cluster-26641.11297	10.965	9.39	18.3675	13.8575	9.7125	FALSE	DOWN	FALSE	FALSE	uncharacterized protein LOC100162711
Cluster-26641.11357	58.1875	20.535	14.6225	37.73	31.21	UP	FALSE	FALSE	FALSE	endocuticle structural glycoprotein SgAbd-8-like
Cluster-26641.11382	13.6375	6.2325	5.4175	21.61	14.14	UP	FALSE	DOWN	FALSE	SEC14-like protein 2 isoform X1
Cluster-26641.11407	1.1	2.37	2.0825	2.15	1.6475	DOWN	FALSE	FALSE	FALSE	60S ribosomal protein L17
Cluster-26641.11414	14.8525	8.06	6.7725	16.2775	19.7	FALSE	FALSE	DOWN	FALSE	cytoplasmic polyadenylation element-binding protein 1
Cluster-26641.11415	14.6125	34.535	43.7275	45.8475	47.6575	DOWN	FALSE	FALSE	FALSE	protein naked cuticle homolog 2-like
Cluster-26641.11417	108.865	143.345	244.86	123.607	75.145	FALSE	FALSE	UP	FALSE	uncharacterized protein LOC111037974
Cluster-26641.11460	4.9825	3.8	6.3875	6.95	3.47	FALSE	FALSE	FALSE	UP	solute carrier family 46 member 3 isoform X2
Cluster-26641.11461	5.845	36.955	39.16	39.95	32.555	DOWN	FALSE	FALSE	FALSE	uncharacterized protein LOC100168481
Cluster-26641.11500	471.91	86	144.787	215.76	64.99	UP	FALSE	FALSE	UP	ACYPI003453
Cluster-26641.11504	120.762	105.825	156.062	109.268	52.1975	FALSE	FALSE	FALSE	UP	glycine-rich cell wall structural protein 1.0-like isoform X2
Cluster-26641.11544	14.135	27.5275	46.6275	38.25	36.4025	DOWN	FALSE	FALSE	FALSE	ACYPI003661
Cluster-26641.11551	10.5	6.595	12	5.1575	7.275	FALSE	FALSE	UP	FALSE	actin-3, muscle-specific
Cluster-26641.11567	87.54	182.683	430.318	47.4575	13.775	FALSE	DOWN	UP	UP	RNA-binding protein 14
Cluster-26641.11604	27.5125	12.4575	9.8625	15.2375	14.87	UP	FALSE	FALSE	FALSE	nuclear hormone receptor FTZ-F1-like
Cluster-26641.11656	2924.55	545.062	764.4	935.832	408.377	UP	FALSE	FALSE	UP	cuticle protein 21-like
Cluster-26641.11685	5.285	3.2175	1.075	0.9625	2.235	FALSE	UP	FALSE	DOWN	uncharacterized protein LOC107168557
Cluster-26641.11717	0.7825	1.64	2.2075	2.105	1.8775	DOWN	FALSE	FALSE	FALSE	hypothetical protein ALC62_12823
Cluster-26641.11755	5.3775	12.665	15.64	14.8675	14.8975	DOWN	FALSE	FALSE	FALSE	uncharacterized protein LOC111029952
Cluster-26641.11788	53.6175	39.78	66.22	44.6875	20.09	FALSE	FALSE	FALSE	UP	cuticular protein analogous to peritrophins 3-C precursor
Cluster-26641.11789	46.795	32.34	54.9275	35.1875	16.3225	FALSE	FALSE	FALSE	UP	cuticular protein analogous to peritrophins 3-C isoform X1
Cluster-26641.11792	35.9525	48.825	21.3575	15.475	16.95	FALSE	UP	FALSE	FALSE	lactase-phlorizin hydrolase-like
Cluster-26641.11809	17.6775	6.7175	7.3925	14.93	9.7025	UP	FALSE	FALSE	FALSE	uncharacterized protein LOC100165312
Cluster-26641.11826	3.43	3.99	5.7125	13.5425	7.3425	FALSE	FALSE	DOWN	FALSE	annulin-like isoform X1
Cluster-26641.11829	1.8375	4.4275	3.3525	2.38	2.23	DOWN	FALSE	FALSE	FALSE	uncharacterized protein LOC103308399
Cluster-26641.11851	8.165	16.905	20.71	20.9675	19.27	DOWN	FALSE	FALSE	FALSE	zinc finger homeobox protein 3 isoform X3
Cluster-26641.11857	2.865	1.005	1.2175	1.7625	1.185	UP	FALSE	FALSE	FALSE	pair-rule protein odd-paired-like
Cluster-26641.11866	9.7225	13.0225	15.7325	6.54	7.4825	FALSE	FALSE	UP	FALSE	zinc finger BED domain-containing protein 5-like
Cluster-26641.11869	18.1425	9.1525	12.075	17.86	8.0225	FALSE	FALSE	FALSE	UP	ACYPI006373
Cluster-26641.11900	12.755	7.4375	20.02	19.58	24.185	FALSE	DOWN	FALSE	FALSE	1,5-anhydro-D-fructose reductase
Cluster-26641.11906	3.565	13.395	11.99	9.7975	9.0425	DOWN	FALSE	FALSE	FALSE	noggin-like
Cluster-26641.11922	3.7725	2.3825	1.1325	2.825	3.815	FALSE	UP	DOWN	FALSE	uncharacterized protein LOC103311496
Cluster-26641.11926	1361.34	267.222	347.383	336.21	145.65	UP	FALSE	FALSE	UP	cuticle protein-like
Cluster-26641.11939	6.0025	5.505	2.225	5.3975	4.7325	FALSE	UP	DOWN	FALSE	uncharacterized protein LOC100574673
Cluster-26641.11948	31.475	14.82	11.54	21.08	27.095	UP	FALSE	FALSE	FALSE	J domain-containing protein
Cluster-26641.11949	3.3625	0.9075	0.585	1.03	1.2375	UP	FALSE	FALSE	FALSE	J domain-containing protein
Cluster-26641.11955	2.25	1.3325	0.5975	1.29	1.43	FALSE	UP	FALSE	FALSE	protein FAM166B-like
Cluster-26641.12003	17.09	33.28	41.5175	39.8275	38.475	DOWN	FALSE	FALSE	FALSE	zinc finger protein GLI3 isoform X1
Cluster-26641.12007	4.375	7.04	15.3175	4.0975	5.5175	FALSE	FALSE	UP	FALSE	probable cytochrome P450 6a13
Cluster-26641.12008	2.495	19.555	34.4425	86.6875	93.295	DOWN	FALSE	FALSE	FALSE	uncharacterized protein LOC111040419
Cluster-26641.12022	26.8125	26.3975	12.3575	17.59	25.84	FALSE	UP	FALSE	FALSE	myosin heavy chain, muscle isoform X46
Cluster-26641.12023	7.06	13.965	15.615	14.79	14.035	DOWN	FALSE	FALSE	FALSE	M-phase inducer phosphatase 3
Cluster-26641.12026	7.5475	4.965	4.5375	2.205	1.27	FALSE	FALSE	UP	FALSE	mucin-2 isoform X1
Cluster-26641.12032	3.435	3.385	7.1175	8.2425	9.1525	FALSE	DOWN	FALSE	FALSE	box A-binding factor
Cluster-26641.12133	41.2675	64.205	50.1275	26.805	30.53	FALSE	FALSE	UP	FALSE	ACYPI002611
Cluster-26641.12148	0.75	0.5275	0.2925	0.685	0.785	FALSE	FALSE	DOWN	FALSE	octopamine receptor-like isoform X1
Cluster-26641.12151	23.135	10.4375	5.91	10.5	10.665	UP	FALSE	FALSE	FALSE	transcription factor Ken 1
Cluster-26641.12171	24.49	19.0675	50.8025	24.0725	15.1825	FALSE	DOWN	UP	FALSE	phosphatidylethanolamine-binding protein-like isoform X1
Cluster-26641.12184	6.9525	7.26	4.1075	9.4	8.595	FALSE	FALSE	DOWN	FALSE	uncharacterized protein LOC100159162
Cluster-26641.12240	4.04	16.0325	16.13	14.04	11.8975	DOWN	FALSE	FALSE	FALSE	fork head domain transcription factor slp1-like
Cluster-26641.12248	1.835	1.1875	2.375	3.2875	4.0775	FALSE	DOWN	FALSE	FALSE	glucose dehydrogenase
Cluster-26641.12256	2.69	2.9	1.3325	2.585	2.855	FALSE	UP	FALSE	FALSE	nucleic-acid-binding protein from mobile element jockey-like
Cluster-26641.12263	2.215	1.5075	0.7825	2.2425	2.83	FALSE	FALSE	DOWN	FALSE	dopamine receptor 1-like
Cluster-26641.12264	39.7575	21.6775	10.1275	9.525	12.9375	FALSE	UP	FALSE	FALSE	uncharacterized protein LOC111038715
Cluster-26641.12284	244.29	67.4825	76.0725	168.59	48.2125	UP	FALSE	FALSE	UP	uncharacterized protein LOC107163917
Cluster-26641.12317	15.3875	6.36	3.28	11.0075	5.045	UP	FALSE	DOWN	UP	ACYPI005037
Cluster-26641.12362	0.2675	3.68	4.9925	4.8275	4.465	DOWN	FALSE	FALSE	FALSE	homeobox protein DLX-6 isoform X2
Cluster-26641.12363	4.255	5.265	2.0775	5.05	5.72	FALSE	UP	DOWN	FALSE	myosin heavy chain, muscle isoform X45
Cluster-26641.12372	31.6875	67.52	99.45	59.2325	54.6075	DOWN	FALSE	FALSE	FALSE	uncharacterized protein LOC107173106
Cluster-26641.12375	3.9225	4.5075	1.34	1.4375	1.4225	FALSE	UP	FALSE	FALSE	uncharacterized family 31 glucosidase KIAA1161
Cluster-26641.1240	0.085	1.19	11.245	1.8475	0.1825	DOWN	FALSE	FALSE	FALSE	LOW QUALITY PROTEIN: eukaryotic translation initiation factor 3 subunit D-1
Cluster-26641.12418	150.735	202.907	367.188	553.145	50.7525	FALSE	FALSE	FALSE	UP	larval cuticle protein A3A-like
Cluster-26641.12433	12.45	7.205	4.4475	10.1175	12.355	FALSE	FALSE	DOWN	FALSE	nicotinic acetylcholine receptor subunit alpha 7 subunit
Cluster-26641.12434	1.2425	0.5225	0.6875	1.2275	1.3475	UP	FALSE	FALSE	FALSE	neurexin-1-like
Cluster-26641.12472	4.83	2.2125	3.14	3.4475	3.895	UP	FALSE	FALSE	FALSE	sodium-independent sulfate anion transporter isoform X1
Cluster-26641.12499	6.785	7.38	2.7175	5.9475	7.62	FALSE	UP	DOWN	FALSE	myosin heavy chain, muscle isoform X24
Cluster-26641.12515	238.18	112.95	71.1675	42.0125	58.08	UP	FALSE	FALSE	FALSE	glutathione S-transferase-like protein
Cluster-26641.12525	18.6075	8.8125	9.79	14.785	10.7975	UP	FALSE	FALSE	FALSE	basic-leucine zipper transcription factor A-like
Cluster-26641.12530	3.075	6.43	8.4225	7.4625	6.785	DOWN	FALSE	FALSE	FALSE	LOW QUALITY PROTEIN: centromere-associated protein E
Cluster-26641.12544	148.817	31.88	41	54.3525	25.7225	UP	FALSE	FALSE	UP	peroxidase
Cluster-26641.12584	0.145	74.475	69.4425	56.2325	46.13	DOWN	FALSE	FALSE	FALSE	alpha-protein kinase 1-like
Cluster-26641.12588	3.495	3.1575	1.21	2.8825	3.3325	FALSE	UP	DOWN	FALSE	myosin heavy chain, muscle isoform X33
Cluster-26641.12629	90.7325	34.3025	41.4	63.2525	17.995	FALSE	FALSE	FALSE	UP	putative defense protein Hdd11
Cluster-26641.12640	1.13	2.42	2.4	2.2175	1.9375	DOWN	FALSE	FALSE	FALSE	40S ribosomal protein S19
Cluster-26641.12652	10.78	9.4925	16.6825	6.4675	9.2125	FALSE	FALSE	UP	FALSE	uncharacterized protein LOC107885178
Cluster-26641.12658	51.895	16.745	18.5275	19.125	13.735	UP	FALSE	FALSE	FALSE	collagen alpha-1..I.. chain-like
Cluster-26641.12666	13.0125	79.5875	73.7	72.7925	65.3125	DOWN	FALSE	FALSE	FALSE	uncharacterized protein LOC107167845, partial
Cluster-26641.12672	5.5225	12.1225	15.1275	14.3675	14.5	DOWN	FALSE	FALSE	FALSE	kinesin-like protein KIF20A
Cluster-26641.12677	6.9575	1.1775	1.065	1.7625	0.5425	UP	FALSE	FALSE	FALSE	CLUMA_CG003286, isoform A
Cluster-26641.12685	58.3225	50.23	23.3	22.685	34.3225	FALSE	UP	FALSE	FALSE	LOW QUALITY PROTEIN: multidrug resistance-associated protein 4
Cluster-26641.12692	86.215	35.245	50.46	55.73	77.6875	UP	FALSE	FALSE	FALSE	uncharacterized protein LOC111033418
Cluster-26641.12693	8.26	9.03	3.4625	5.545	6.0875	FALSE	UP	FALSE	FALSE	fatty acid synthase 3
Cluster-26641.12698	0.56	2.41	22.105	52.085	47.805	DOWN	DOWN	DOWN	FALSE	uncharacterized protein LOC111036037
Cluster-26641.12716	74.9575	128.262	142.252	69.1225	70.52	FALSE	FALSE	UP	FALSE	fatty acid synthase isoform X2
Cluster-26641.12725	80.8575	35.16	23.1525	85.07	12.0525	FALSE	FALSE	FALSE	UP	extensin-2-like
Cluster-26641.12734	2.125	7.0175	10.0325	9.7375	6.555	DOWN	FALSE	FALSE	FALSE	UPF0118 membrane protein bbp_117-like
Cluster-26641.12738	13.535	10.7125	24.5475	34.965	42.535	FALSE	DOWN	FALSE	FALSE	zinc finger homeobox protein 3 isoform X1
Cluster-26641.12744	9.5875	4.27	3.885	6.3775	7.96	UP	FALSE	FALSE	FALSE	uncharacterized protein LOC111031391
Cluster-26641.12776	10.89	23.3625	33.62	33.1475	32.1925	DOWN	FALSE	FALSE	FALSE	neurogenic locus Notch protein isoform X1
Cluster-26641.12789	11.9275	24.3175	16.025	16.4925	14.9775	DOWN	FALSE	FALSE	FALSE	uncharacterized protein LOC100168264
Cluster-26641.12831	21.9175	45.0975	41.19	53.3975	52.505	DOWN	FALSE	FALSE	FALSE	uncharacterized protein LOC107171151
Cluster-26641.12872	39.8875	16.01	9.9325	23.1175	12.7475	UP	FALSE	FALSE	FALSE	uncharacterized protein LOC100162732
Cluster-26641.12899	116.047	101.07	115.612	135.577	45.91	FALSE	FALSE	FALSE	UP	uncharacterized protein LOC111032177
Cluster-26641.12950	5.8275	4.0525	5.31	2.62	3.9875	FALSE	FALSE	UP	FALSE	ecdysone-inducible protein E75-like isoform X1
Cluster-26641.12955	0.455	0.24	9.1775	54.7275	53.9775	FALSE	DOWN	FALSE	FALSE	probable serine..threonine-protein kinase fhkB
Cluster-26641.12963	18.7475	43.25	52.155	40.51	34.79	DOWN	FALSE	FALSE	FALSE	sushi, von Willebrand factor type A, EGF and pentraxin domain-containing protein 1 isoform X1
Cluster-26641.13010	247.34	86.36	63.775	121.09	59.525	UP	FALSE	FALSE	UP	extensin-2-like
Cluster-26641.13054	20.555	49.66	72.8225	68.9325	67.995	DOWN	FALSE	FALSE	FALSE	DNA N6-methyl adenine demethylase
Cluster-26641.1306	0.0175	0.16	2.185	0.25	0.0025	FALSE	FALSE	FALSE	UP	nuclear pore complex protein Nup153 isoform X1
Cluster-26641.13077	5.4725	7.335	7.66	3.61	3.6575	FALSE	FALSE	UP	FALSE	angiotensin converting enzyme-like precursor
Cluster-26641.13090	0.03	0.925	13.755	13.36	16.6925	DOWN	DOWN	FALSE	FALSE	uncharacterized protein LOC111031155 isoform X2
Cluster-26641.13091	1901.56	318.593	531.112	618.422	202.578	UP	FALSE	FALSE	UP	cuticle protein 19-like
Cluster-26641.13095	147.52	52.53	35.5025	82.84	31.925	FALSE	FALSE	FALSE	UP	uncharacterized protein LOC111038898
Cluster-26641.13103	48.5525	21.4625	18.9475	38.1875	17.4275	UP	FALSE	FALSE	UP	protein obstructor-E
Cluster-26641.13168	4.4725	11.7875	16.32	16.47	16.3625	DOWN	FALSE	FALSE	FALSE	neurogenic locus protein delta
Cluster-26641.13169	5.58	1.3025	1.16	2.5125	1.1325	UP	FALSE	FALSE	FALSE	loricrin
Cluster-26641.13178	243.725	55.2025	77.5375	121.13	33.905	UP	FALSE	FALSE	UP	cuticle protein 19-like
Cluster-26641.13179	2245.3	658.433	938.325	1554.85	238.972	UP	FALSE	FALSE	UP	cuticular protein 5 precursor
Cluster-26641.13180	743.415	352.342	551.227	1015.11	57.515	FALSE	FALSE	FALSE	UP	cuticle protein-like
Cluster-26641.13183	439.975	126.22	185.477	329.768	55.5725	UP	FALSE	FALSE	UP	ACYPI003453
Cluster-26641.13189	25.1275	21.945	24.515	34.5775	17.155	FALSE	FALSE	FALSE	UP	alpha-tocopherol transfer protein-like
Cluster-26641.13199	3665.85	3892.49	1701.37	1332.6	1428.68	FALSE	UP	FALSE	FALSE	fatty acid synthase-like
Cluster-26641.13200	728.328	2010.92	2231.64	1566.74	2078.86	DOWN	FALSE	FALSE	FALSE	ACYPI002010
Cluster-26641.13201	199.11	622.597	711.493	526.337	696.622	DOWN	FALSE	FALSE	FALSE	heat shock protein 83
Cluster-26641.13215	1804.85	529.905	457.01	950.112	447.12	UP	FALSE	FALSE	UP	adhesive plaque matrix protein-like
Cluster-26641.13255	8.2325	3.535	3	6.0675	4.4125	UP	FALSE	FALSE	FALSE	protein Skeletor, isoforms B..C
Cluster-26641.13259	1.34	1.19	0.5075	1.0225	1.155	FALSE	UP	FALSE	FALSE	Down syndrome cell adhesion molecule-like protein Dscam2 isoform X2
Cluster-26641.13261	30.01	68.27	57.7375	44.98	36.5975	DOWN	FALSE	FALSE	FALSE	uncharacterized protein LOC107166471
Cluster-26641.13294	4.665	11.1325	11.1925	12.3325	12.4875	DOWN	FALSE	FALSE	FALSE	noggin-like
Cluster-26641.13295	266.113	97.4375	47.9725	110.39	91.03	UP	FALSE	FALSE	FALSE	cuticle protein 19-like
Cluster-26641.13327	490.522	225.823	290.78	300.835	134.885	FALSE	FALSE	FALSE	UP	putative chemosensory protein CSP2
Cluster-26641.13345	52.0225	18.4925	12.9025	14.6775	15.5	UP	FALSE	FALSE	FALSE	maltase A1-like
Cluster-26641.13365	228.237	81.5775	148.09	137.545	193.252	UP	FALSE	FALSE	FALSE	Mp1-like effector
Cluster-26641.13396	160.955	446.092	213.425	171.255	162.678	DOWN	FALSE	FALSE	FALSE	cystathionine gamma-lyase
Cluster-26641.13421	170.902	50.0725	70.3775	65.6025	80.58	UP	FALSE	FALSE	FALSE	putative sheath protein, partial
Cluster-26641.13426	58.9075	114.875	131.93	135.553	132.887	DOWN	FALSE	FALSE	FALSE	RNA-binding protein squid-like isoform X1
Cluster-26641.13431	51.8825	23.51	11.63	38.7225	51.005	UP	FALSE	DOWN	FALSE	histone H1-like
Cluster-26641.13436	599.46	1380.06	18282.8	31384.6	23231.5	DOWN	DOWN	FALSE	FALSE	uncharacterized protein LOC100570877
Cluster-26641.13439	778.245	875.855	1081.41	996.002	464.795	FALSE	FALSE	FALSE	UP	uncharacterized protein LOC107163372
Cluster-26641.13484	1049.75	459.048	243.532	135.735	241.77	UP	FALSE	FALSE	FALSE	cathepsin B-like cysteine proteinase 4
Cluster-26641.13485	22.985	12.3625	9.7875	4.78	8.0225	FALSE	FALSE	UP	FALSE	putative cathepsin B-N
Cluster-26641.13499	64.235	77.28	165.515	138.107	65.5875	FALSE	DOWN	FALSE	UP	collagen alpha-2..IV.. chain
Cluster-26641.13505	457.942	556.25	1102.1	652.983	223.755	FALSE	DOWN	FALSE	UP	skin secretory protein xP2-like
Cluster-26641.13522	53.335	65.6925	57.9	31.0075	34.37	FALSE	FALSE	UP	FALSE	chorion peroxidase
Cluster-26641.13525	16.435	31.8675	33.19	36.0475	37.28	DOWN	FALSE	FALSE	FALSE	G2..mitotic-specific cyclin-B
Cluster-26641.13531	5.8975	16.0025	18.4525	17.405	15.725	DOWN	FALSE	FALSE	FALSE	probable G-protein coupled receptor Mth-like 1
Cluster-26641.13535	36.16	49.6175	57.9575	27.3025	24.6875	FALSE	FALSE	UP	FALSE	amidophosphoribosyltransferase isoform X2
Cluster-26641.13570	19.3325	67.0275	74.225	95.7025	88.555	DOWN	FALSE	FALSE	FALSE	uncharacterized protein MAL8P1.12-like
Cluster-26641.13577	29.5275	46.8125	305.01	490.975	515.237	FALSE	DOWN	FALSE	FALSE	uncharacterized protein LOC111036037
Cluster-26641.13579	1.5525	3.3025	2.84	4.7825	4.8175	DOWN	FALSE	FALSE	FALSE	Putative 115 kDa protein in type-1 retrotransposable element R1DM-like Protein
Cluster-26641.13594	34.4975	13.96	3.5875	11.4825	12.3875	UP	UP	DOWN	FALSE	hypothetical protein C0J52_13966
Cluster-26641.13606	76.83	147.19	463.88	163.833	238.555	FALSE	DOWN	UP	FALSE	cuticle protein 16.5-like
Cluster-26641.13619	48.69	19.6275	22.6125	24.365	16.3175	UP	FALSE	FALSE	FALSE	scavenger receptor class B member 1 isoform X1
Cluster-26641.1363	0.035	0.525	6.46	1.195	0.0725	FALSE	FALSE	FALSE	UP	probable aminopeptidase NPEPL1 isoform X1
Cluster-26641.13677	72.6075	31.1175	26.1	44.3275	18.89	UP	FALSE	FALSE	UP	ACYPI008164
Cluster-26641.13678	12.85	5.14	3.0875	6.6675	3.4775	UP	FALSE	FALSE	FALSE	uncharacterized protein LOC100167365 precursor
Cluster-26641.13692	1.68	14.335	16.0275	11.415	9.1875	DOWN	FALSE	FALSE	FALSE	ACYPI002562
Cluster-26641.13701	4536.46	4034.23	7709.02	3468.65	1892.37	FALSE	FALSE	UP	FALSE	endocuticle structural glycoprotein SgAbd-2-like isoform X2
Cluster-26641.13713	7.4175	5.3325	29.3925	581.22	580.087	FALSE	FALSE	DOWN	FALSE	adhesive plaque matrix protein-like isoform X1
Cluster-26641.13718	30.205	23.0575	15.08	32.7525	34.46	FALSE	FALSE	DOWN	FALSE	uncharacterized protein LOC107169848
Cluster-26641.13721	2.0475	5.715	11.565	11.2625	10.6975	DOWN	DOWN	FALSE	FALSE	uncharacterized protein LOC111041217
Cluster-26641.13763	15.035	15.6925	36.6275	15.14	18.1875	FALSE	DOWN	UP	FALSE	uncharacterized protein LOC111043013
Cluster-26641.13831	37.69	30.115	13.06	23.765	34.325	FALSE	UP	FALSE	FALSE	neurofilament medium polypeptide-like
Cluster-26641.13858	2.62	5.085	4.5575	3.56	4.1975	DOWN	FALSE	FALSE	FALSE	chorismate synthase
Cluster-26641.13861	25.6875	53.0175	127.305	98.4625	101.805	FALSE	DOWN	FALSE	FALSE	adhesive plaque matrix protein
Cluster-26641.13870	2.5575	2.7075	3.4925	7.275	3.535	FALSE	FALSE	FALSE	UP	piggyBac transposable element-derived protein 3-like
Cluster-26641.13879	514.74	474.258	803.79	236.085	340.845	FALSE	FALSE	UP	FALSE	cuticle protein 16.5-like
Cluster-26641.13893	335.475	248.835	573.35	215.358	633.133	FALSE	DOWN	UP	DOWN	tentative cuticle protein
Cluster-26641.13907	154.222	386.083	436.803	303.222	383.013	DOWN	FALSE	FALSE	FALSE	heat shock protein 83
Cluster-26641.13910	47.505	66.7125	101.483	29.9475	16.5075	FALSE	FALSE	UP	FALSE	cell surface glycoprotein 1
Cluster-26641.13922	4.445	10.9425	4.4125	6.7575	7.9775	DOWN	FALSE	FALSE	FALSE	ATP-dependent RNA helicase p62-like isoform X1
Cluster-26641.13968	872.075	889.335	1483.12	465.35	413.205	FALSE	FALSE	UP	FALSE	cuticle protein-like
Cluster-26641.13974	0.03	0.22	1.7725	2.0625	1.555	FALSE	DOWN	FALSE	FALSE	uncharacterized protein LOC111036037
Cluster-26641.13975	3.1575	8.3275	83.2725	119.722	96.1925	DOWN	DOWN	FALSE	FALSE	uncharacterized protein LOC111038926
Cluster-26641.13995	535.955	211.535	187.42	627.595	153.19	UP	FALSE	DOWN	UP	repetitive proline-rich cell wall protein 2-like
Cluster-26641.14006	4138.9	4218.36	1703.29	1577.11	1867.55	FALSE	UP	FALSE	FALSE	fatty acid synthase-like
Cluster-26641.14009	66.335	70.8875	210.442	167.24	138.535	FALSE	DOWN	FALSE	FALSE	adhesive plaque matrix protein
Cluster-26641.14023	125.013	126	3007.64	4079.53	2836.99	FALSE	DOWN	FALSE	FALSE	uncharacterized protein LOC100570877
Cluster-26641.14025	4.32	11.855	19.8	20.17	20.0475	DOWN	FALSE	FALSE	FALSE	innexin inx1-like, partial
Cluster-26641.14026	1.4475	1.2825	30.62	40.7775	37.3375	FALSE	DOWN	FALSE	FALSE	uncharacterized protein LOC111036037
Cluster-26641.14031	17.375	43.7725	995.16	1576.38	1428.22	DOWN	DOWN	FALSE	FALSE	uncharacterized protein LOC111036037
Cluster-26641.14061	171.673	104.785	243.382	102.36	81.06	FALSE	DOWN	UP	FALSE	uncharacterized protein LOC111032027
Cluster-26641.14084	97.375	246.003	300.425	293.395	300.99	DOWN	FALSE	FALSE	FALSE	coatomer subunit gamma-2 isoform X2
Cluster-26641.14085	51.51	43.8375	240.748	251.212	278.208	FALSE	DOWN	FALSE	FALSE	uncharacterized protein LOC107168880
Cluster-26641.14094	2.1725	6.19	8.6975	8.575	7.35	DOWN	FALSE	FALSE	FALSE	protein Teyrha-meyrha-like isoform X2
Cluster-26641.14116	10.1075	6.56	12.8425	18.1275	25.4275	FALSE	DOWN	FALSE	FALSE	uncharacterized protein LOC100167373 isoform X2
Cluster-26641.14119	29.36	48.5675	502.655	608.045	371.608	FALSE	DOWN	FALSE	FALSE	uncharacterized protein LOC100570877
Cluster-26641.14120	621.875	965.623	18834.5	26411	16349.1	FALSE	DOWN	FALSE	FALSE	uncharacterized protein LOC111038926
Cluster-26641.14135	167.57	90.205	121.543	128.387	65.11	FALSE	FALSE	FALSE	UP	signaling mucin HKR1-like
Cluster-26641.14147	15.5575	4.3	3.4675	6.3425	4.85	UP	FALSE	FALSE	FALSE	CD151 antigen isoform X1
Cluster-26641.14193	114.843	38.315	121.44	124.233	138.618	UP	DOWN	FALSE	FALSE	uncharacterized protein LOC100572986
Cluster-26641.14266	34.2175	16.0875	14.45	16.15	21.135	UP	FALSE	FALSE	FALSE	fatty acid synthase isoform X1
Cluster-26641.14287	4.3125	10.3075	12.9825	12.8325	11.625	DOWN	FALSE	FALSE	FALSE	zygotic gap protein knirps-like
Cluster-26641.14298	5235.99	5976.7	2666.03	4250.67	3166.03	FALSE	UP	FALSE	FALSE	NADH dehydrogenase subunit 5
Cluster-26641.14321	3.6725	8.47	197.44	287.752	244.515	DOWN	DOWN	FALSE	FALSE	uncharacterized protein LOC111036037
Cluster-26641.14370	9.6525	20.0675	20.9375	18.77	16.0825	DOWN	FALSE	FALSE	FALSE	uncharacterized protein LOC111027604
Cluster-26641.14399	698.04	750.11	321.118	369.218	494.433	FALSE	UP	FALSE	FALSE	LOW QUALITY PROTEIN: fatty acid synthase-like
Cluster-26641.14415	124.465	49.135	47.1625	57.8675	43.3575	UP	FALSE	FALSE	FALSE	protein takeout-like
Cluster-26641.1442	0.015	0.2075	3.5025	0.345	0.0075	FALSE	FALSE	FALSE	UP	integrator complex subunit 4
Cluster-26641.14424	257.478	121.115	71.725	107.56	68.385	UP	FALSE	FALSE	FALSE	mucin-2 isoform X7
Cluster-26641.14442	47.2825	66.41	28.925	33.0425	44.075	FALSE	UP	FALSE	FALSE	myrosinase 1 isoform X2
Cluster-26641.14468	14.145	21.3775	41.77	40.985	37.98	FALSE	DOWN	FALSE	FALSE	feline leukemia virus subgroup C receptor-related protein 2
Cluster-26641.14471	1773.22	3476.35	4192.55	4066.51	3924.31	DOWN	FALSE	FALSE	FALSE	prothymosin alpha-like
Cluster-26641.14474	10.01	7.4875	9.6625	5.0525	5.995	FALSE	FALSE	UP	FALSE	heat shock protein cognate 3 isoform X1
Cluster-26641.14482	0.0675	0.13	2.61	17.81	21.4225	FALSE	DOWN	DOWN	FALSE	ACYPI27259
Cluster-26641.14495	54.6175	32.5	36.4225	48.34	22.445	FALSE	FALSE	FALSE	UP	ataxin-2 homolog
Cluster-26641.14536	10.44	22.0575	565.758	1136.15	1141.85	DOWN	DOWN	FALSE	FALSE	uncharacterized protein LOC111036037
Cluster-26641.14537	0.0775	0.0625	1.265	3.4175	5.28	FALSE	DOWN	DOWN	FALSE	uncharacterized protein LOC111036037
Cluster-26641.14545	1090.28	393.15	330.243	921.972	158.55	FALSE	FALSE	FALSE	UP	tetra-peptide repeat homeobox protein 1-like
Cluster-26641.14570	5.67	10.9775	16.8325	17.1325	16.2825	DOWN	FALSE	FALSE	FALSE	protein dachsous
Cluster-26641.14591	748.707	2431.93	2814.57	2112.83	2663.67	DOWN	FALSE	FALSE	FALSE	heat shock protein 90
Cluster-26641.14616	759.085	297.07	461.26	585.453	293.292	FALSE	FALSE	FALSE	UP	endocuticle structural glycoprotein ABD-4-like
Cluster-26641.14680	13.0475	12.005	24.8225	34.075	40.9025	FALSE	DOWN	FALSE	FALSE	class E basic helix-loop-helix protein 22
Cluster-26641.1472	0	0.2725	9.2225	0	0	FALSE	FALSE	UP	FALSE	uncharacterized protein LOC105212101 isoform X1
Cluster-26641.14732	2035.7	529.365	431.722	951.033	576.715	UP	FALSE	FALSE	FALSE	cuticle protein 7-like
Cluster-26641.14733	624.402	172.045	149.13	264.23	161.197	UP	FALSE	FALSE	FALSE	adhesive plaque matrix protein-like
Cluster-26641.1474	0.03	0.165	2.6075	0.335	0.0125	FALSE	FALSE	FALSE	UP	uncharacterized protein LOC105226598
Cluster-26641.14743	208.832	207.767	84.675	90.3575	110.398	FALSE	UP	FALSE	FALSE	macrophage migration inhibitory factor-like
Cluster-26641.14750	60.48	50.285	64.845	74.31	31.61	FALSE	FALSE	FALSE	UP	alpha-tocopherol transfer protein-like isoform X2
Cluster-26641.14783	14.7975	7.13	9.6925	11.5525	11.56	UP	FALSE	FALSE	FALSE	paxillin-like isoform X2
Cluster-26641.14829	7.4175	14.705	14.7325	15.2025	14.3975	DOWN	FALSE	FALSE	FALSE	G1..S-specific cyclin-D2
Cluster-26641.14841	1029.37	382.615	430.115	780.965	192.06	FALSE	FALSE	FALSE	UP	RR1 cuticle protein 1 precursor
Cluster-26641.14914	51.9325	78.2025	168.127	165.795	84.6825	FALSE	DOWN	FALSE	UP	uncharacterized protein LOC111032327
Cluster-26641.14924	6.555	20.1125	21.785	21.3725	21.6525	DOWN	FALSE	FALSE	FALSE	LOW QUALITY PROTEIN: cadherin-related tumor suppressor
Cluster-26641.14925	1148.96	1204.06	500.737	405.902	463.275	FALSE	UP	FALSE	FALSE	fatty acid synthase-like
Cluster-26641.14957	1.34	2.8825	4.845	3.23	2.275	DOWN	FALSE	FALSE	FALSE	uncharacterized protein LOC111028659
Cluster-26641.14996	1.605	0.865	6.7375	26.335	35.73	FALSE	DOWN	DOWN	FALSE	uncharacterized protein LOC111032939
Cluster-26641.14999	203.093	62.55	72.39	71.9325	33.23	UP	FALSE	FALSE	UP	adhesive plaque matrix protein-like
Cluster-26641.15019	2.0825	6.22	9.3225	6.4575	3.5975	DOWN	FALSE	FALSE	FALSE	Retrovirus-related Pol polyprotein from transposon 412-like Protein
Cluster-26641.15036	2549.26	2844.04	5844.31	2693.91	1110.27	FALSE	DOWN	UP	UP	calphotin-like
Cluster-26641.15037	609.515	612.148	1193.88	1298.75	777.395	FALSE	DOWN	FALSE	FALSE	uncharacterized protein LOC107165607
Cluster-26641.15048	2.28	5.9375	21.4425	21.1	23.0325	DOWN	DOWN	FALSE	FALSE	uncharacterized protein LOC107166211
Cluster-26641.15067	6.4425	19.665	24.1625	23.2825	20.63	DOWN	FALSE	FALSE	FALSE	growth arrest-specific protein 1-like
Cluster-26641.15079	6.575	17.4375	19.7825	20.5725	19.4625	DOWN	FALSE	FALSE	FALSE	heterogeneous nuclear ribonucleoprotein 27C-like isoform X2
Cluster-26641.15091	2.5375	5.0925	7.2125	7.8725	8.0975	DOWN	FALSE	FALSE	FALSE	homeotic protein ultrabithorax isoform X1
Cluster-26641.15098	80.6225	29.845	26.4775	61.1	9.4375	FALSE	FALSE	FALSE	UP	pollen-specific leucine-rich repeat extensin-like protein 1
Cluster-26641.15128	432.812	107.75	142.488	135.928	64.9975	UP	FALSE	FALSE	UP	cuticle protein
Cluster-26641.1517	0.06	1.2525	16.13	1.8275	0.0125	FALSE	FALSE	FALSE	UP	breast cancer metastasis-suppressor 1-like protein
Cluster-26641.15179	51.04	49.0175	18.9875	25.28	29.775	FALSE	UP	FALSE	FALSE	macrophage migration inhibitory factor-like
Cluster-26641.15198	1.2775	0.6125	0.5125	0.72	1.1125	UP	FALSE	FALSE	FALSE	uncharacterized protein LOC111039937
Cluster-26641.15208	4.2475	13.18	19.8075	10.9625	4.7725	DOWN	FALSE	FALSE	UP	procollagen-lysine,2-oxoglutarate 5-dioxygenase 2 isoform X2
Cluster-26641.15235	2.695	12.7475	32.0825	31.4325	30.0375	DOWN	DOWN	FALSE	FALSE	uncharacterized protein LOC111029575
Cluster-26641.15244	1.05	3.5575	8.125	7.255	6.605	DOWN	DOWN	FALSE	FALSE	uncharacterized protein LOC100169047 isoform X2
Cluster-26641.15293	7.295	1.6	3.6725	3.165	2.515	UP	FALSE	FALSE	FALSE	uncharacterized protein LOC100162203
Cluster-26641.15308	0.675	1.48	5.0175	8.765	11.8875	DOWN	DOWN	FALSE	FALSE	sterile alpha and TIR motif-containing protein 1-like
Cluster-26641.15324	8.1975	3.9075	1.8925	3.94	5.4	UP	FALSE	FALSE	FALSE	zinc finger protein 236-like
Cluster-26641.15339	20.93	8.6175	6.49	7.8625	5.265	UP	FALSE	FALSE	FALSE	proline-rich extensin-like protein EPR1
Cluster-26641.15351	3.97	3.5975	4.64	2.2175	2.325	FALSE	FALSE	UP	FALSE	3-hydroxyisobutyrate dehydrogenase
Cluster-26641.15355	4.935	4.5875	9.335	7.925	6.605	FALSE	DOWN	FALSE	FALSE	zinc finger protein 271-like isoform X1
Cluster-26641.15367	2.0225	4.355	3.1725	5.0925	4.9175	DOWN	FALSE	FALSE	FALSE	uncharacterized protein LOC111038054
Cluster-26641.15386	1.08	4.1975	11.6525	27.635	6.8775	DOWN	DOWN	DOWN	UP	Retrovirus-related Pol polyprotein from transposon 412-like Protein
Cluster-26641.15401	14.73	6.905	7.1475	7.705	7.0975	UP	FALSE	FALSE	FALSE	uncharacterized protein LOC100160832 isoform X1
Cluster-26641.15407	226.507	237.08	338.66	261.887	119.485	FALSE	FALSE	FALSE	UP	uncharacterized protein LOC107163372
Cluster-26641.15476	14.385	34.77	35.7425	36.14	34.3075	DOWN	FALSE	FALSE	FALSE	uncharacterized protein LOC100165422
Cluster-26641.15483	2.445	4.135	5.5775	1.9475	1.6125	FALSE	FALSE	UP	FALSE	LOW QUALITY PROTEIN: fatty acyl-CoA reductase 1-like
Cluster-26641.15496	35.1975	16.385	11.425	14.265	12.65	UP	FALSE	FALSE	FALSE	ATP-binding cassette sub-family G member 1-like
Cluster-26641.15503	1.415	0.515	0.15	0.28	0.3775	UP	UP	FALSE	FALSE	uncharacterized protein LOC111038715
Cluster-26641.15505	24.575	20.0325	8.9925	14.07	23.36	FALSE	UP	FALSE	FALSE	multidrug resistance-associated protein 4 isoform X1
Cluster-26641.15516	1073.08	935.65	1725.18	642.065	279.22	FALSE	FALSE	UP	UP	calphotin-like
Cluster-26641.15517	43.0425	29.0625	50.2425	17.7125	8.135	FALSE	FALSE	UP	UP	angiotensin-converting enzyme-like
Cluster-26641.15518	778.648	685.303	1298.76	580.175	214.795	FALSE	FALSE	UP	UP	calphotin-like
Cluster-26641.15519	347.045	327.488	578.81	208.77	85.375	FALSE	FALSE	UP	UP	calphotin-like
Cluster-26641.15520	274.81	207.44	373.9	140	57.8	FALSE	FALSE	UP	UP	skin secretory protein xP2-like
Cluster-26641.15542	5.9	8.9275	13.86	6.605	8.07	FALSE	FALSE	UP	FALSE	venom protease-like
Cluster-26641.15543	317.015	110.358	99.03	234.593	36.7875	FALSE	FALSE	FALSE	UP	hypothetical protein DDB_G0279493
Cluster-26641.15547	0.2675	0.0475	0.06	0.2875	0.2075	FALSE	FALSE	DOWN	FALSE	uncharacterized protein LOC111032161
Cluster-26641.15587	6.49	18.5425	22.17	22.1275	21.265	DOWN	FALSE	FALSE	FALSE	uncharacterized protein LOC111037591 isoform X1
Cluster-26641.15588	755.278	246.173	223.682	515.47	202.715	UP	FALSE	FALSE	UP	cuticle protein 7-like
Cluster-26641.15617	8.4375	5.6125	3.915	8.475	9.2875	FALSE	FALSE	DOWN	FALSE	tolloid-like protein 1
Cluster-26641.15651	271.197	82.02	78.4075	170.923	61.595	UP	FALSE	FALSE	UP	cuticular protein 7
Cluster-26641.15682	2.6925	8.9325	12.095	11.785	10.855	DOWN	FALSE	FALSE	FALSE	homeotic protein ultrabithorax-like
Cluster-26641.15692	37.645	17.805	10.7325	11.5325	12.98	UP	FALSE	FALSE	FALSE	5-aminolevulinate synthase, erythroid-specific, mitochondrial
Cluster-26641.15735	59.65	65.58	114.505	54.85	30.9	FALSE	FALSE	UP	FALSE	branched-chain-amino-acid aminotransferase, cytosolic
Cluster-26641.15777	70.85	27.74	28.7875	35.3925	27.9975	UP	FALSE	FALSE	FALSE	pro-resilin-like
Cluster-26641.15792	1.245	0.2825	0.385	0.5675	0.4425	UP	FALSE	FALSE	FALSE	zinc finger BED domain-containing protein 4-like, partial
Cluster-26641.15808	3.9275	1.8025	1.6175	6.0125	7.65	UP	FALSE	DOWN	FALSE	histone H1A, sperm-like
Cluster-26641.15813	15.4825	32.1425	20.7725	23.3975	16.69	DOWN	FALSE	FALSE	FALSE	protein CREG1
Cluster-26641.15814	49.32	102.147	63.895	71.0975	49.61	DOWN	FALSE	FALSE	FALSE	protein CREG1-like
Cluster-26641.15832	91.015	32.135	32.815	55.7025	20.305	UP	FALSE	FALSE	UP	cuticular protein analogous to peritrophins 3-D1 precursor
Cluster-26641.15835	1791.74	1294.45	2390.89	974.81	589.418	FALSE	FALSE	UP	FALSE	larval cuticle protein LCP-22-like isoform X1
Cluster-26641.15855	0.92	0.7825	1.0775	0.4975	0.54	FALSE	FALSE	UP	FALSE	tryptase
Cluster-26641.15895	17.2375	12.2175	14.3875	7.7625	8.5475	FALSE	FALSE	UP	FALSE	fatty acid synthase 2
Cluster-26641.15939	9.0825	5.28	2.505	5.6175	8.06	FALSE	UP	DOWN	FALSE	agrin-like
Cluster-26641.15940	2.3525	5.725	6.84	7.55	6.8975	DOWN	FALSE	FALSE	FALSE	DNA N6-methyl adenine demethylase
Cluster-26641.15944	73.105	80.0775	156.42	54.22	38.865	FALSE	FALSE	UP	FALSE	adhesive plaque matrix protein-like
Cluster-26641.16004	20.205	26.1275	38.7125	21.02	20.0525	FALSE	FALSE	UP	FALSE	lysosomal alpha-mannosidase-like
Cluster-26641.16043	1.4175	3.1725	2.4825	2.6825	2.6325	DOWN	FALSE	FALSE	FALSE	RNA-directed DNA polymerase from mobile element jockey-like
Cluster-26641.16052	30.7575	19.345	24.2275	12.71	18.1225	FALSE	FALSE	UP	FALSE	fatty acyl-CoA reductase wat-like
Cluster-26641.1611	1.74	2.76	2.7875	1.31	1.0175	FALSE	FALSE	UP	FALSE	uncharacterized protein LOC111030987
Cluster-26641.16119	1.4225	1.705	4.7725	8.245	30.95	FALSE	DOWN	FALSE	DOWN	PR-5-like protein
Cluster-26641.1612	6.195	3.425	1.3925	5.195	1.385	FALSE	FALSE	FALSE	UP	glucose dehydrogenase
Cluster-26641.16120	69.725	54.695	22.4425	22.715	37.355	FALSE	UP	FALSE	FALSE	aminopeptidase N 2, partial
Cluster-26641.16132	19.2625	7.49	6.91	12.8525	9.705	UP	FALSE	FALSE	FALSE	uncharacterized protein LOC111038132 isoform X2
Cluster-26641.16140	30.1625	32.585	64.4525	55.4275	64.94	FALSE	DOWN	FALSE	FALSE	uncharacterized protein LOC100160550
Cluster-26641.16205	2.8075	0.595	0.4425	0.5075	1.115	UP	FALSE	FALSE	FALSE	gustatory and odorant receptor 22-like
Cluster-26641.16213	1.325	0.6975	0.3175	0.9975	0.6175	FALSE	FALSE	DOWN	FALSE	PDZ and LIM domain protein 3 isoform X2
Cluster-26641.16225	31.405	11.82	10.1675	31.875	4.025	UP	FALSE	DOWN	UP	cuticle protein-like
Cluster-26641.16237	1.515	1.47	0.59	0.9875	1.1175	FALSE	UP	FALSE	FALSE	kinesin-like protein KIF19
Cluster-26641.16241	8.06	2.5675	1.6	2.355	2.185	UP	FALSE	FALSE	FALSE	serine..threonine-protein phosphatase 2A 55 kDa regulatory subunit B beta isoform isoform X1
Cluster-26641.16277	3.2575	1.4775	4.005	3.75	5.14	UP	DOWN	FALSE	FALSE	1,5-anhydro-D-fructose reductase
Cluster-26641.16325	5.0975	5.41	10.6175	9.855	10.4975	FALSE	DOWN	FALSE	FALSE	uncharacterized protein LOC111034836
Cluster-26641.16333	55.22	20.655	25.4975	51.4325	3.2075	FALSE	FALSE	FALSE	UP	cuticle protein 7-like
Cluster-26641.16335	4.735	23.565	21.2975	8.6625	8.94	DOWN	FALSE	UP	FALSE	maltase A3-like
Cluster-26641.16373	1.485	3.0275	3.48	3.245	3.155	DOWN	FALSE	FALSE	FALSE	hyaluronan mediated motility receptor
Cluster-26641.16390	18.1225	7.0325	5.5225	14.105	4.7325	UP	FALSE	FALSE	UP	uncharacterized protein LOC111035215, partial
Cluster-26641.1641	0.6325	1.6175	1.755	1.6375	1.465	DOWN	FALSE	FALSE	FALSE	dendritic arbor reduction protein 1-like
Cluster-26641.16423	143.995	106.03	93.7025	402.197	7.625	FALSE	FALSE	FALSE	UP	ACYPI004943
Cluster-26641.16425	5.995	3.9025	5.1925	1.6975	1.7275	FALSE	FALSE	UP	FALSE	mucin-2-like
Cluster-26641.16494	16.94	9.9725	20.345	8.6825	9.9275	FALSE	DOWN	UP	FALSE	solute carrier family 35 member B1
Cluster-26641.16498	170.428	96.32	119.882	55.0275	42.2825	FALSE	FALSE	UP	FALSE	putative diacetyl..L-xylulose reductase
Cluster-26641.16499	21.45	10.725	15.365	7.755	6.625	FALSE	FALSE	UP	FALSE	L-xylulose reductase-like
Cluster-26641.1652	7.625	2.9075	2.3025	4.0075	2.4225	UP	FALSE	FALSE	FALSE	uncharacterized protein LOC107173896
Cluster-26641.16522	487.942	547.933	1123.73	500.517	209.53	FALSE	DOWN	UP	UP	uncharacterized protein LOC111039766
Cluster-26641.16529	17.435	33.0225	64.4125	45.865	29.2875	FALSE	DOWN	FALSE	FALSE	cytochrome P450 6CY9
Cluster-26641.16570	0.4225	0.525	0.2125	0.1725	0.115	FALSE	UP	FALSE	FALSE	RNA-directed DNA polymerase from mobile element jockey-like
Cluster-26641.16571	39.06	13.82	8.96	17.34	10.9975	UP	FALSE	FALSE	FALSE	putative fatty acyl-CoA reductase CG5065
Cluster-26641.16572	21.7425	11.0025	11.1625	12.68	5.1175	FALSE	FALSE	FALSE	UP	putative fatty acyl-CoA reductase CG5065
Cluster-26641.16582	2.1825	6.095	5.4075	4.84	4.705	DOWN	FALSE	FALSE	FALSE	nuclear receptor subfamily 2 group E member 1-like
Cluster-26641.16605	18.43	3.57	0.99	14.4775	12.6275	FALSE	FALSE	DOWN	FALSE	polyprotein, partial
Cluster-26641.16647	4.3725	3.5	2.41	3.79	1.4225	FALSE	FALSE	FALSE	UP	atrophin-1-like
Cluster-26641.16660	4.8825	4.88	10.9975	4.4	6.1575	FALSE	DOWN	UP	FALSE	nose resistant to fluoxetine protein 6-like
Cluster-26641.1675	1.2775	0.705	0.385	1.4725	1.9575	FALSE	FALSE	DOWN	FALSE	LOW QUALITY PROTEIN: vascular endothelial growth factor A-like
Cluster-26641.16796	2.265	7.655	4.385	3.3725	2.64	DOWN	FALSE	FALSE	FALSE	facilitated trehalose transporter Tret1-like
Cluster-26641.16798	6.91	4.26	1.34	1.42	2.085	FALSE	UP	FALSE	FALSE	UDP-glucuronosyl transferase 344B4
Cluster-26641.16800	35.6475	25.2475	17.4975	9.015	11.94	FALSE	FALSE	UP	FALSE	UDP-glucuronosyl transferase 344B4
Cluster-26641.16801	225.558	123.29	79.11	40.41	78.3	FALSE	FALSE	UP	FALSE	UDP-glucuronosyl transferase 344B4
Cluster-26641.16802	0.43	0.3275	0.8475	0.3075	0.3025	FALSE	FALSE	UP	FALSE	UDP-glucuronosyl transferase 344B4
Cluster-26641.16804	86.3525	47.4875	24.935	17.9725	39.6025	FALSE	FALSE	FALSE	DOWN	UDP-glucuronosyl transferase 344B4
Cluster-26641.16805	7.2375	3.1825	3	2.34	2.89	UP	FALSE	FALSE	FALSE	UDP-glucuronosyl transferase 344B4
Cluster-26641.16808	41.69	21.475	9.5975	7.49	16.91	FALSE	UP	FALSE	DOWN	UDP-glucuronosyl transferase 344B4
Cluster-26641.16809	1.93	0.645	0.2275	0.395	0.6425	UP	UP	FALSE	FALSE	uncharacterized protein LOC111038822
Cluster-26641.16881	9.4975	11.8175	19.13	9.4975	9.67	FALSE	FALSE	UP	FALSE	uncharacterized protein LOC107166394
Cluster-26641.16994	5.4175	11.8425	15.4625	14.22	13.7275	DOWN	FALSE	FALSE	FALSE	rac GTPase-activating protein 1-like isoform X1
Cluster-26641.17009	9.9875	1.76	0.4825	0.5425	1.455	UP	FALSE	FALSE	FALSE	maltase A1
Cluster-26641.17070	19.3775	14.495	25.8675	22.95	9.9325	FALSE	FALSE	FALSE	UP	LOW QUALITY PROTEIN: aldehyde dehydrogenase
Cluster-26641.17074	14.375	17.665	0	0	11.81	FALSE	UP	FALSE	FALSE	unkown protein
Cluster-26641.17085	6.055	13.08	13.73	13.9025	13.63	DOWN	FALSE	FALSE	FALSE	laminin subunit alpha-1
Cluster-26641.17159	6.5775	3.0875	2.5375	4.235	4.975	UP	FALSE	FALSE	FALSE	calcium-activated potassium channel slowpoke isoform X17
Cluster-26641.17178	8.13	5.91	3.78	8.6625	10.1125	FALSE	FALSE	DOWN	FALSE	BTB..POZ domain-containing protein KCTD8
Cluster-26641.17212	13.0825	23.8075	85.7875	11.43	8.9025	FALSE	DOWN	UP	FALSE	uncharacterized protein LOC100166606 precursor
Cluster-26641.17244	14.5625	11.9425	38.9075	15.8675	16.325	FALSE	DOWN	UP	FALSE	sporozoite surface protein 2-like
Cluster-26641.1726	14.6225	34.9625	43.5075	27.975	20.6525	DOWN	FALSE	FALSE	FALSE	uncharacterized protein LOC100573855
Cluster-26641.17285	4.955	9.7075	14.105	11.0725	7.635	DOWN	FALSE	FALSE	FALSE	uncharacterized protein LOC100163240
Cluster-26641.17321	27.095	14.23	8.3025	18.73	15.16	FALSE	FALSE	DOWN	FALSE	alpha-tocopherol transfer protein-like
Cluster-26641.17322	42.1225	17.93	15.125	30.175	18.22	UP	FALSE	FALSE	FALSE	alpha-tocopherol transfer protein-like
Cluster-26641.17379	30.51	14.1075	13.07	15.25	10.72	UP	FALSE	FALSE	FALSE	protein yellow-like isoform X2
Cluster-26641.1739	1.51	0.52	0.7475	0.695	0.85	UP	FALSE	FALSE	FALSE	A disintegrin and metalloproteinase with thrombospondin motifs 14-like isoform X2
Cluster-26641.17391	5.5675	6.1725	7.1625	3.275	3.71	FALSE	FALSE	UP	FALSE	fatty acid synthase
Cluster-26641.17393	2.5725	6.2	36.7575	83.395	64.69	DOWN	DOWN	DOWN	FALSE	ACYPI005590
Cluster-26641.17399	0.12	0.5175	1.2925	1.6225	1.4475	DOWN	DOWN	FALSE	FALSE	trypsin-3-like
Cluster-26641.17447	474.847	643.377	271.615	216.295	240.845	FALSE	UP	FALSE	FALSE	lactase-phlorizin hydrolase-like
Cluster-26641.17459	1.3775	4.2125	15.7375	18.0975	16.96	DOWN	DOWN	FALSE	FALSE	uncharacterized protein LOC100573379 isoform X2
Cluster-26641.17460	0.805	3.6725	14.1575	13.5375	9.69	DOWN	DOWN	FALSE	FALSE	Retrovirus-related Pol polyprotein from transposon 412-like Protein
Cluster-26641.17512	25.9825	9.335	10.51	15.6225	17.2275	UP	FALSE	FALSE	FALSE	annexin B9-like
Cluster-26641.17514	72.8625	106.945	109.1	55.1425	55.275	FALSE	FALSE	UP	FALSE	fatty acid synthase isoform X2
Cluster-26641.17528	45.75	45.99	18.02	14.245	20.97	FALSE	UP	FALSE	FALSE	sodium-coupled monocarboxylate transporter 1
Cluster-26641.17538	0.685	0.5025	0.53	1.2125	1.3975	FALSE	FALSE	DOWN	FALSE	la-related protein 4 isoform X3
Cluster-26641.17551	6.005	2.855	2.07	4.3875	4.8075	UP	FALSE	FALSE	FALSE	voltage-dependent calcium channel type A subunit alpha-1 isoform X5
Cluster-26641.17614	1.0225	2.3275	2.145	2.3275	2.5525	DOWN	FALSE	FALSE	FALSE	cyclin-dependent kinase 1-like
Cluster-26641.17615	15.48	32.905	39.2125	35.33	31.6725	DOWN	FALSE	FALSE	FALSE	cyclin-dependent kinase 1-like
Cluster-26641.17633	32.805	26.9575	83.875	29.1975	39.8725	FALSE	DOWN	UP	FALSE	cuticle protein 16.5-like
Cluster-26641.17660	14.045	15.755	6.73	7.23	8.505	FALSE	UP	FALSE	FALSE	protein 5NUC-like
Cluster-26641.17732	24.5975	31.7375	49.5525	45.98	23.1775	FALSE	FALSE	FALSE	UP	collagen alpha-1..IV.. chain
Cluster-26641.17745	13.215	10.025	16.2075	11.555	5.1775	FALSE	FALSE	FALSE	UP	uncharacterized protein LOC100163338
Cluster-26641.17746	6.92	5.2025	9.68	5.87	2.285	FALSE	FALSE	FALSE	UP	uncharacterized protein LOC100163338
Cluster-26641.17788	2.7975	2.345	4.9575	5.6025	2.955	FALSE	DOWN	FALSE	FALSE	protein yellow-like isoform X1
Cluster-26641.17814	0.5275	0.42	0.32	1.18	0.9925	FALSE	FALSE	DOWN	FALSE	uncharacterized protein LOC111030875
Cluster-26641.17818	3.27	1.7125	1.1075	2.7225	3.06	FALSE	FALSE	DOWN	FALSE	sphingosine kinase B-like
Cluster-26641.17832	4.9375	4.135	9.0625	10.6775	12.2875	FALSE	DOWN	FALSE	FALSE	protein mab-21-like
Cluster-26641.17834	3.535	1.7	1.6425	2.555	2.9725	UP	FALSE	FALSE	FALSE	potassium voltage-gated channel protein Shab isoform X1
Cluster-26641.17897	38.43	7.8075	8.5975	14.88	6.565	UP	FALSE	FALSE	UP	ACYPI005387
Cluster-26641.1794	4.845	1.87	1.385	2.675	2.05	UP	FALSE	FALSE	FALSE	cytochrome P450 6k1-like
Cluster-26641.17995	16.83	8.125	9.45	11.7025	10.53	UP	FALSE	FALSE	FALSE	serine protease persephone-like
Cluster-26641.17997	4.78	3.0025	2.2075	5.8125	6.435	FALSE	FALSE	DOWN	FALSE	uncharacterized protein LOC111040251 isoform X1
Cluster-26641.18003	15.635	9.295	5.195	11.3275	15.4975	FALSE	FALSE	DOWN	FALSE	uncharacterized protein LOC111031020
Cluster-26641.18007	2.785	8.2875	7.59	6.875	6.44	DOWN	FALSE	FALSE	FALSE	DNA primase large subunit-like
Cluster-26641.18016	5.3775	10.045	15.6	8.1775	7.32	FALSE	FALSE	UP	FALSE	transmembrane protease serine 9-like
Cluster-26641.18024	24.05	29.02	19.215	29.4875	14.7425	FALSE	FALSE	FALSE	UP	putative ammonium transporter 1
Cluster-26641.18055	10.2125	3.825	2.49	1.8025	2.7425	UP	FALSE	FALSE	FALSE	UDP-glucuronosyl transferase 344L2
Cluster-26641.18067	17.23	15.62	27.3875	12.235	18.815	FALSE	FALSE	UP	FALSE	uncharacterized protein LOC111040178
Cluster-26641.18134	2.3875	3.645	7.055	5.8525	6.1925	FALSE	DOWN	FALSE	FALSE	protein charlatan isoform X2
Cluster-26641.18190	0.795	0.395	0.185	0.8025	0.5925	FALSE	FALSE	DOWN	FALSE	piezo-type mechanosensitive ion channel component-like isoform X6
Cluster-26641.18218	0.67	1.11	1.435	1.065	2.4675	FALSE	FALSE	FALSE	DOWN	serine protease nudel-like
Cluster-26641.18302	3.1225	8.0775	10.59	10.8925	11.14	DOWN	FALSE	FALSE	FALSE	homeobox protein engrailed-2-like isoform X1
Cluster-26641.18328	18.52	8.3375	8.19	9.8825	7.67	UP	FALSE	FALSE	FALSE	dual oxidase
Cluster-26641.18353	1.62	5.825	5.52	3.8275	3.37	DOWN	FALSE	FALSE	FALSE	uncharacterized protein LOC107171284, partial
Cluster-26641.18380	10.3375	3.135	1.26	4.815	2.7125	UP	FALSE	FALSE	FALSE	protein takeout-like
Cluster-26641.18381	3.0125	0.685	0.4925	1.0775	0.8075	UP	FALSE	FALSE	FALSE	protein takeout-like
Cluster-26641.18416	0.8075	0.3625	0.685	0.8425	0.8975	UP	FALSE	FALSE	FALSE	pancreas transcription factor 1 subunit alpha-like
Cluster-26641.18470	24.5525	49.59	22.0275	20.7575	22.8575	DOWN	UP	FALSE	FALSE	lysosomal acid phosphatase isoform X1
Cluster-26641.18477	8.5025	17.3225	18.275	13.9225	12.935	DOWN	FALSE	FALSE	FALSE	RNA-binding protein lin-28-like
Cluster-26641.18498	11.795	20.455	41.285	29.3775	17.8	FALSE	DOWN	FALSE	FALSE	1,4-alpha-glucan-branching enzyme
Cluster-26641.18527	18.75	8.19	9.6675	9.5675	12.25	UP	FALSE	FALSE	FALSE	uncharacterized protein LOC111039236 isoform X1
Cluster-26641.1854	0.01	0.18	1.6775	0.3475	0.0175	FALSE	FALSE	FALSE	UP	trafficking kinesin-binding protein milt isoform X2
Cluster-26641.18549	8.5175	17.0875	18.6875	14.8375	15.1875	DOWN	FALSE	FALSE	FALSE	condensin complex subunit 1
Cluster-26641.18551	3.105	1.1525	1.7325	1.68	1.4025	UP	FALSE	FALSE	FALSE	uncharacterized protein LOC100574593
Cluster-26641.18574	9.985	5.8025	4.4625	9.82	12.03	FALSE	FALSE	DOWN	FALSE	gamma-aminobutyric acid receptor subunit beta isoform X1
Cluster-26641.18579	3.67	2.4525	1.2475	2.7125	3.4075	FALSE	FALSE	DOWN	FALSE	otoferlin-like isoform X1
Cluster-26641.18608	2.9175	0.9425	0.835	1.53	1.8025	UP	FALSE	FALSE	FALSE	UDP-glucuronosyl transferase 344M2
Cluster-26641.18638	172.688	31.6675	62.6925	81.8575	16.65	UP	FALSE	FALSE	UP	cuticular protein 41 precursor
Cluster-26641.18644	1.2075	0.135	0.165	0.0225	0.2075	UP	FALSE	FALSE	FALSE	cytochrome b5-like
Cluster-26641.18656	4.9975	11.7025	15.3425	13.435	13.54	DOWN	FALSE	FALSE	FALSE	homeobox protein Hox-A4-like
Cluster-26641.18678	0.6	1.345	1.64	1.8875	1.315	DOWN	FALSE	FALSE	FALSE	synaptic vesicle membrane protein VAT-1 homolog-like
Cluster-26641.18705	16.2825	19.5975	15.8175	7.27	7.1975	FALSE	FALSE	UP	FALSE	LOW QUALITY PROTEIN: eukaryotic translation initiation factor 4 gamma 3-like
Cluster-26641.18767	1.6175	1.04	0.7775	1.8325	1.605	FALSE	FALSE	DOWN	FALSE	heat shock 70 kDa protein 12A-like isoform X2
Cluster-26641.18778	1.73	1.2925	0.485	1.155	1.1675	FALSE	FALSE	DOWN	FALSE	uncharacterized protein LOC111036542
Cluster-26641.18795	5.69	6.2825	9.0325	4.6675	6.8275	FALSE	FALSE	UP	FALSE	serine proteinase stubble-like isoform X1
Cluster-26641.1880	1.64	4.07	10.2825	2.915	3.89	DOWN	DOWN	UP	FALSE	venom protease-like isoform X2
Cluster-26641.18808	1.1475	0.08	0.32	0.5075	0.0875	UP	FALSE	FALSE	FALSE	pollen-specific leucine-rich repeat extensin-like protein 1 precursor
Cluster-26641.18836	0.5775	1.2525	1.2825	1.0775	0.705	DOWN	FALSE	FALSE	FALSE	translation factor GUF1 homolog, chloroplastic-like
Cluster-26641.18855	9.675	7.1	16.85	21.8225	21.3275	FALSE	DOWN	FALSE	FALSE	neurogenin-3
Cluster-26641.18870	6.47	4.965	10.1775	7.245	6.525	FALSE	DOWN	FALSE	FALSE	formin-like protein 20
Cluster-26641.18911	31.0275	21.9975	26.5025	27.5875	13.0875	FALSE	FALSE	FALSE	UP	protein obstructor-E-like
Cluster-26641.18916	53.2275	7.85	33.145	65.6375	13.2175	UP	FALSE	FALSE	UP	DNA-directed RNA polymerase II subunit RPB1-like
Cluster-26641.18917	77.5625	33.9525	50.855	122.962	38.4775	UP	FALSE	DOWN	UP	rRNA ..adenosine-2'-O-..-methyltransferase, putative
Cluster-26641.18918	38.88	12.2425	30.39	64.535	14.7125	UP	FALSE	FALSE	UP	cuticle protein-like
Cluster-26641.19009	7.495	14.4375	20.21	19.925	17.115	DOWN	FALSE	FALSE	FALSE	protein expanded
Cluster-26641.19011	3.5325	1.525	1.4825	1.8025	2.435	UP	FALSE	FALSE	FALSE	ninjurin-1-like isoform X1
Cluster-26641.19026	92.0675	40.0225	22.7225	60.2	22.4975	UP	FALSE	FALSE	UP	yellow-y precursor
Cluster-26641.19068	5.4875	5.3475	2.8975	6.4075	7.005	FALSE	FALSE	DOWN	FALSE	pseudouridine-5'-phosphate glycosidase isoform X1
Cluster-26641.19103	0.3275	0.37	0.6975	1.49	0.2975	FALSE	FALSE	FALSE	UP	endonuclease-reverse transcriptase
Cluster-26641.19136	1.6025	0.6975	0.7275	1.175	1.3575	UP	FALSE	FALSE	FALSE	mediator of RNA polymerase II transcription subunit 12-like isoform X2
Cluster-26641.19218	1.39	2.1475	4.5925	5.5225	3.8975	FALSE	DOWN	FALSE	FALSE	E3 ubiquitin-protein ligase Arkadia-like isoform X1
Cluster-26641.19235	0.91	3.615	10.27	5.8325	4.8625	DOWN	DOWN	FALSE	FALSE	delta-9 desaturase-like isoform X1
Cluster-26641.19256	3.9375	2.0775	4.1725	4.6625	3.725	FALSE	DOWN	FALSE	FALSE	amine sulfotransferase-like
Cluster-26641.19323	7.0625	3.2675	1.9975	2.1525	3.3375	UP	FALSE	FALSE	FALSE	cathepsin B-like
Cluster-26641.19328	1.8475	1.3825	0.765	2.01	2.4575	FALSE	FALSE	DOWN	FALSE	hypothetical protein B7P43_G13697
Cluster-26641.19339	4.3075	8.85	2.7725	7.165	6.6925	DOWN	UP	FALSE	FALSE	Uncharacterized protein APZ42_003968
Cluster-26641.19344	0.9425	0.2675	0.3275	0.4475	0.65	UP	FALSE	FALSE	FALSE	tubulin polyglutamylase complex subunit 2
Cluster-26641.19365	150.222	165.55	149.243	328.51	16.6625	FALSE	FALSE	FALSE	UP	testis-specific gene A8 protein-like
Cluster-26641.19388	0.7	0.4075	0.255	0.64	0.62	FALSE	FALSE	DOWN	FALSE	uncharacterized protein LOC103307918
Cluster-26641.19392	1.545	0.73	0.54	0.835	1.18	UP	FALSE	FALSE	FALSE	junctophilin-2
Cluster-26641.19397	5.715	3.0025	2.295	9.5625	12.2475	FALSE	FALSE	DOWN	FALSE	histone H1A, sperm-like
Cluster-26641.19402	0.5925	0.21	1.9675	6.01	10.82	FALSE	DOWN	DOWN	FALSE	protein Diedel
Cluster-26641.19410	3.0775	0.865	0.5525	0.66	0.7775	UP	FALSE	FALSE	FALSE	protein grindelwald-like
Cluster-26641.19430	2.42	0.91	0.815	1.425	1.5575	UP	FALSE	FALSE	FALSE	somatostatin receptor type 5
Cluster-26641.19434	0.25	0.395	1.4925	4.21	3.0125	FALSE	DOWN	FALSE	FALSE	uncharacterized protein LOC111040551
Cluster-26641.19454	20.7575	8.2925	5.395	8.9475	13.235	UP	FALSE	FALSE	FALSE	G-protein coupled receptor moody isoform X1
Cluster-26641.19470	2.015	1.62	1.09	2.93	3.4875	FALSE	FALSE	DOWN	FALSE	uncharacterized protein LOC103310536
Cluster-26641.19545	4.6225	5.3725	6.755	3.2575	2.7225	FALSE	FALSE	UP	FALSE	uncharacterized protein LOC100164798
Cluster-26641.19599	8.515	33.75	45.1075	60.0125	46.665	DOWN	FALSE	FALSE	FALSE	uncharacterized protein LOC107173452
Cluster-26641.19614	1.2175	0.41	0.35	0.4575	0.5725	UP	FALSE	FALSE	FALSE	uncharacterized protein LOC107171813
Cluster-26641.19652	6.33	4.1	2.955	6.6	7.7525	FALSE	FALSE	DOWN	FALSE	uncharacterized protein LOC100162966
Cluster-26641.19699	7.485	2.9225	3.6475	8.38	5.745	UP	FALSE	DOWN	FALSE	solute carrier family 46 member 3-like
Cluster-26641.19711	25.3775	39.315	27.2475	24.9425	4.2475	FALSE	FALSE	FALSE	UP	uncharacterized protein LOC100159423
Cluster-26641.19747	2.3875	1.8875	4.28	5.3775	5.6425	FALSE	DOWN	FALSE	FALSE	transcription factor collier
Cluster-26641.19776	4.4625	2.6975	1.7625	3.9525	4.2175	FALSE	FALSE	DOWN	FALSE	potassium voltage-gated channel protein Shaker, partial
Cluster-26641.19796	0.165	0.5225	0.5325	0.3275	0.41	DOWN	FALSE	FALSE	FALSE	purH
Cluster-26641.1980	2.0325	1.015	7.7875	1.305	5.4925	FALSE	DOWN	FALSE	FALSE	myosin regulatory light chain 2
Cluster-26641.19846	2.41	2.1675	4.39	5.965	7.2575	FALSE	DOWN	FALSE	FALSE	LIM homeobox transcription factor 1-beta-like isoform X2
Cluster-26641.19872	7.1825	22.3175	43.8	26.1	9.385	DOWN	DOWN	FALSE	UP	amine sulfotransferase-like
Cluster-26641.19883	1.0075	0.7725	0.7375	1.7125	1.62	FALSE	FALSE	DOWN	FALSE	uncharacterized protein LOC111040970 isoform X1
Cluster-26641.19890	6.545	2.325	2.7425	2.955	4.04	UP	FALSE	FALSE	FALSE	uncharacterized protein LOC107166265
Cluster-26641.20	0.53	0.3875	1.3125	1.095	1.13	FALSE	DOWN	FALSE	FALSE	transcriptional activator GLI3
Cluster-26641.20002	25.0225	29.655	24.795	18.8175	3.8225	FALSE	FALSE	FALSE	UP	zinc finger protein 512B-like
Cluster-26641.20122	62.4175	18.235	20.24	20.06	10.9175	UP	FALSE	FALSE	FALSE	protein takeout-like
Cluster-26641.20128	5.3625	5.5375	15.84	8.5	6.21	FALSE	DOWN	UP	FALSE	mushroom body large-type Kenyon cell-specific protein 1-like
Cluster-26641.20129	1.8	1.8575	5.085	2.6025	1.7525	FALSE	DOWN	UP	FALSE	mushroom body large-type Kenyon cell-specific protein 1 isoform X1
Cluster-26641.20132	0.475	0.235	1.355	0.44	0.6625	FALSE	DOWN	FALSE	FALSE	mushroom body large-type Kenyon cell-specific protein 1 isoform X1
Cluster-26641.20206	2.035	0.825	0.7025	1.145	1.755	UP	FALSE	FALSE	FALSE	uncharacterized protein LOC107173795
Cluster-26641.20209	18.05	14.325	6.7	6.455	6.2225	FALSE	UP	FALSE	FALSE	thiamine transporter 1-like
Cluster-26641.20251	0.465	1.7125	1.3075	1.4825	1.215	DOWN	FALSE	FALSE	FALSE	uncharacterized protein LOC111043168
Cluster-26641.20315	19.435	21.3125	14.68	13.5225	4.5275	FALSE	FALSE	FALSE	UP	thiamine transporter 2-like
Cluster-26641.20339	3.73	7.5625	11.1225	8.6175	6.8025	DOWN	FALSE	FALSE	FALSE	protein 5NUC-like
Cluster-26641.20393	25.8375	9.26	16.4625	14.5825	12.885	UP	FALSE	FALSE	FALSE	odorant binding protein 9
Cluster-26641.20430	17.58	8.05	5.03	10.0675	8.37	UP	FALSE	FALSE	FALSE	glucose dehydrogenase
Cluster-26641.20442	7.0275	6.2825	10.1675	2.005	2.9375	FALSE	FALSE	UP	FALSE	elongation of very long chain fatty acids protein 4-like
Cluster-26641.20502	3.975	4.1375	1.9275	2.9075	3.43	FALSE	UP	FALSE	FALSE	uncharacterized protein LOC111035727 isoform X1
Cluster-26641.20541	23.185	24.53	26.1425	24.135	9.7325	FALSE	FALSE	FALSE	UP	matrix metalloproteinase-14 isoform X1
Cluster-26641.20565	0.1775	0.385	0.21	0.3325	0.825	DOWN	FALSE	FALSE	FALSE	hypothetical protein D910_00694, partial
Cluster-26641.20585	5.3425	5.6575	9.3075	3.315	1.9175	FALSE	FALSE	UP	FALSE	uncharacterized protein LOC107169422
Cluster-26641.20586	2.1	1.8725	3.2775	0.64	0.5275	FALSE	FALSE	UP	FALSE	uncharacterized protein LOC107169422
Cluster-26641.20604	0.6625	0.42	0.185	0.515	0.49	FALSE	FALSE	DOWN	FALSE	hemicentin-1
Cluster-26641.20613	0.045	0.1825	0.1825	1.1825	0.3525	FALSE	FALSE	DOWN	UP	uncharacterized protein LOC111026611
Cluster-26641.20668	1.3125	0.165	0.1625	0.1025	0.34	UP	FALSE	FALSE	FALSE	uncharacterized protein LOC100572464
Cluster-26641.20765	5.8275	2.7025	2.6075	3.6325	5.1975	UP	FALSE	FALSE	FALSE	uncharacterized protein LOC111034832
Cluster-26641.20812	12.1075	6.8375	4.7675	2.45	6.385	FALSE	FALSE	UP	DOWN	heat shock protein 68-like
Cluster-26641.20861	1.71	0.82	0.7925	1.27	1.5625	UP	FALSE	FALSE	FALSE	zwei Ig domain protein zig-8-like
Cluster-26641.20866	15.6225	7.2175	8.16	11.6125	14.6125	UP	FALSE	FALSE	FALSE	transmembrane channel-like protein 7
Cluster-26641.20875	6.945	9.23	19.3125	13.315	11.265	FALSE	DOWN	FALSE	FALSE	multiple inositol polyphosphate phosphatase 1-like
Cluster-26641.2092	2.1175	2.59	5.4175	3.545	3.475	FALSE	DOWN	FALSE	FALSE	uncharacterized protein LOC111041362 isoform X1
Cluster-26641.20983	1.8325	0.4875	0.7025	2.45	2.01	UP	FALSE	DOWN	FALSE	transforming growth factor-beta-induced protein ig-h3
Cluster-26641.21022	4.2825	2.2325	1.46	3.75	3.3925	FALSE	FALSE	DOWN	FALSE	uncharacterized protein LOC100573224
Cluster-26641.2106	4.1075	8.33	10.6325	7.1725	6.6625	DOWN	FALSE	FALSE	FALSE	twist-related protein-like
Cluster-26641.21064	0.5275	0.245	0.525	0.4125	0.3375	FALSE	DOWN	FALSE	FALSE	uncharacterized protein LOC107885824, partial
Cluster-26641.21088	16.28	23.215	17.4825	16.28	4.095	FALSE	FALSE	FALSE	UP	esterase E4-like
Cluster-26641.21115	2.545	2.8625	0.9175	1.85	3.26	FALSE	UP	FALSE	FALSE	uncharacterized protein LOC100571853
Cluster-26641.21140	5.9875	2.4625	0.8525	2.4225	2.52	UP	UP	DOWN	FALSE	larval cuticle protein A3A-like isoform X2
Cluster-26641.21194	3.5125	3.55	2.1275	2.42	1.2525	FALSE	FALSE	FALSE	UP	uncharacterized protein LOC100163122 isoform X1
Cluster-26641.2120	0.5625	2.23	2.245	2.705	1.885	DOWN	FALSE	FALSE	FALSE	zinc finger protein 600-like
Cluster-26641.21206	0.84	2.685	5.4475	1.78	5.0375	DOWN	FALSE	UP	DOWN	venom protease-like isoform X1
Cluster-26641.21222	3.115	4.6225	13.7475	4.8275	7.53	FALSE	DOWN	UP	FALSE	uncharacterized protein LOC100167585 isoform X2
Cluster-26641.21223	3.05	2.3175	8.3375	3.165	5.555	FALSE	DOWN	FALSE	FALSE	uncharacterized protein LOC100167585 isoform X2
Cluster-26641.21250	1.9975	0.71	0.5125	0.945	1.195	UP	FALSE	FALSE	FALSE	cyclin-dependent kinase-like 4
Cluster-26641.21269	3.485	6.1925	19.8875	21.0675	14.04	FALSE	DOWN	FALSE	FALSE	proline-rich extensin-like protein EPR1
Cluster-26641.21274	12.255	25.665	11.2975	8.3875	8.6475	DOWN	UP	FALSE	FALSE	uncharacterized protein LOC100574123
Cluster-26641.21293	2.3675	0.9525	2.025	2.2475	3.145	UP	FALSE	FALSE	FALSE	uncharacterized protein LOC111026940
Cluster-26641.21319	0.95	0.97	1.11	4.5	1.72	FALSE	FALSE	DOWN	UP	uncharacterized protein LOC100161116 isoform X1
Cluster-26641.2132	0.5225	0.4075	0.245	0.1125	0.1925	FALSE	FALSE	UP	FALSE	uncharacterized protein LOC103309231
Cluster-26641.21328	0.5525	7.385	2.9675	10.7475	0.08	DOWN	FALSE	FALSE	UP	trimethylguanosine synthase-like
Cluster-26641.21352	1.7575	1.685	0.6925	0.3375	1.0525	FALSE	UP	UP	DOWN	uncharacterized protein LOC111026661
Cluster-26641.21353	1.26	1.2	0.385	0.23	0.52	FALSE	UP	FALSE	FALSE	tubulin glycylase 3A-like
Cluster-26641.21435	0.065	0.8825	14.7675	1.4375	0.045	FALSE	FALSE	FALSE	UP	uncharacterized protein LOC105232993
Cluster-26641.21436	0.0225	0.26	2.82	0.4275	0	FALSE	FALSE	FALSE	UP	uncharacterized protein LOC105232989
Cluster-26641.21487	1.955	0.4825	0.87	1.0775	1.4375	UP	FALSE	FALSE	FALSE	uncharacterized protein LOC111026367
Cluster-26641.21489	4.91	5.4575	7.04	2.6325	3.55	FALSE	FALSE	UP	FALSE	facilitated trehalose transporter Tret1 isoform X2
Cluster-26641.21558	1.16	1.24	2.7775	4.535	4.9925	FALSE	DOWN	FALSE	FALSE	uncharacterized protein LOC100160815
Cluster-26641.21577	11.0125	7.73	10.685	4.9575	5.055	FALSE	FALSE	UP	FALSE	phenoloxidase 2-like
Cluster-26641.216	0.83	0.3825	0.26	0.37	0.4775	UP	FALSE	FALSE	FALSE	uncharacterized protein LOC111031839
Cluster-26641.21621	3.2475	1.4175	0.81	1.0925	1.16	UP	FALSE	FALSE	FALSE	myb-like protein D
Cluster-26641.21641	0.24	15.615	110.085	33.26	1.0525	DOWN	FALSE	FALSE	FALSE	vitellogenin-1
Cluster-26641.21649	0.1925	1.98	37.4475	2.895	0.0725	FALSE	FALSE	FALSE	UP	juvenile hormone epoxide hydrolase 1
Cluster-26641.21663	2.0575	0.8675	0.645	0.965	1.0675	UP	FALSE	FALSE	FALSE	transcription factor 15-like
Cluster-26641.217	2.41	3.215	3.285	1.7025	1.745	FALSE	FALSE	UP	FALSE	major facilitator superfamily domain-containing protein 6-like
Cluster-26641.21762	19.91	13.9775	3.7175	7.6125	14.3525	FALSE	UP	FALSE	FALSE	LOW QUALITY PROTEIN: bifunctional lycopene cyclase..phytoene synthase-like
Cluster-26641.21765	0.1125	0.075	0.36	4.6625	4.21	FALSE	FALSE	DOWN	FALSE	tigger transposable element-derived protein 4-like
Cluster-26641.21768	0.31	0.215	0.2925	1.7425	1.9675	FALSE	FALSE	DOWN	FALSE	piggyBac transposable element-derived protein 3-like
Cluster-26641.21781	8.515	2.6975	2.26	6.55	2.8	UP	FALSE	FALSE	UP	pro-resilin-like
Cluster-26641.21787	1.84	1.2375	0.53	1.455	1.9275	FALSE	FALSE	DOWN	FALSE	SCAN domain-containing protein 3-like
Cluster-26641.21838	10.045	25.395	34.995	36.5825	37.6475	DOWN	FALSE	FALSE	FALSE	protein hairy
Cluster-26641.21915	3.1975	0.11	0.1075	0.08	0.0275	UP	FALSE	FALSE	FALSE	glutaredoxin-like isoform X1
Cluster-26641.21925	76.67	37.0125	50.8725	83.175	4.5825	UP	FALSE	FALSE	UP	cuticle protein 7-like
Cluster-26641.21931	2.9825	10.815	18.1525	20.2725	19.7	DOWN	FALSE	FALSE	FALSE	fork head domain-containing protein FD4-like
Cluster-26641.21968	2.4	3.71	5.685	0.655	0.62	FALSE	FALSE	UP	FALSE	glucose dehydrogenase
Cluster-26641.2201	1.6625	3.9525	5.1875	4.8675	5.115	DOWN	FALSE	FALSE	FALSE	homeobox protein prospero-like
Cluster-26641.22075	13.79	3.4225	6.4025	4.6675	8.11	UP	FALSE	FALSE	FALSE	cytochrome P450 CYP6A2
Cluster-26641.22198	0.6175	0.2	0.2575	0.3725	0.24	UP	FALSE	FALSE	FALSE	armadillo repeat-containing protein 2
Cluster-26641.2222	2.4875	1.9775	4.3175	3.835	4.5975	FALSE	DOWN	FALSE	FALSE	peroxidase
Cluster-26641.22253	1.115	0.31	0.1275	0.2875	0.095	UP	FALSE	FALSE	FALSE	AF4..FMR2 family member 4-like isoform X2
Cluster-26641.22466	3.905	3.095	2.33	1.575	4.3025	FALSE	FALSE	FALSE	DOWN	acetyl-coenzyme A transporter 1
Cluster-26641.226	0.5675	7.89	8.855	8.8375	8.04	DOWN	FALSE	FALSE	FALSE	GS homeobox 2
Cluster-26641.2266	0.855	1.0625	4.0575	5.7425	5.665	FALSE	DOWN	FALSE	FALSE	mitochondrial sodium..hydrogen exchanger 9B2
Cluster-26641.22677	12.78	4.3675	3.3625	5.835	2	UP	FALSE	FALSE	UP	uncharacterized protein LOC111032994
Cluster-26641.22693	4.905	1.6725	1.4	2.05	2.07	UP	FALSE	FALSE	FALSE	clavesin-1
Cluster-26641.22697	5.97	2.66	2.99	3.485	3.74	UP	FALSE	FALSE	FALSE	uncharacterized protein LOC111040445 isoform X1
Cluster-26641.22741	28.6025	0	0	0	0	UP	FALSE	FALSE	FALSE	polyprotein, partial
Cluster-26641.22742	1.125	0.0275	0.015	0.0725	0.035	UP	FALSE	FALSE	FALSE	ACYPI000065
Cluster-26641.22756	2.0725	0.45	0.71	2.5025	3.08	UP	FALSE	FALSE	FALSE	cytochrome P450
Cluster-26641.2290	1.1525	2.6975	3.7775	3.39	3.1125	DOWN	FALSE	FALSE	FALSE	putative leucine-rich repeat-containing protein DDB_G0290503 isoform X2
Cluster-26641.23087	1.7075	6.2675	8.1925	8.02	7.33	DOWN	FALSE	FALSE	FALSE	hypothetical protein BRAFLDRAFT_123257
Cluster-26641.23104	11.22	3.5	2.6125	7.1975	2.24	UP	FALSE	FALSE	UP	aminopeptidase N-like
Cluster-26641.2315	11.71	5.8325	4.7325	9.6025	2.6525	FALSE	FALSE	FALSE	UP	ACYPI009803
Cluster-26641.23486	1.1625	0.445	0.5675	0.98	1.105	UP	FALSE	FALSE	FALSE	protein yellow-like
Cluster-26641.23488	3.11	6.6825	17.2825	9.29	6.1325	DOWN	DOWN	UP	FALSE	beta-glucuronidase-like
Cluster-26641.2351	2.265	0.9975	1.0125	0.955	1.45	UP	FALSE	FALSE	FALSE	glucose dehydrogenase
Cluster-26641.23532	2.84	2.195	0.03	3.3275	0.2425	FALSE	FALSE	DOWN	FALSE	threonine-rich protein-like
Cluster-26641.236	0.3525	0.375	0.1625	0.52	0.3825	FALSE	FALSE	DOWN	FALSE	uncharacterized protein LOC111032729
Cluster-26641.2372	2.2375	22.1025	26.8025	21.05	15.175	DOWN	FALSE	FALSE	FALSE	flexible cuticle protein 12-like
Cluster-26641.23791	2.1975	0.805	0.7475	0.885	0.805	UP	FALSE	FALSE	FALSE	NFX1-type zinc finger-containing protein 1-like
Cluster-26641.23794	0.6925	2.2275	2.135	1.4325	1.5475	DOWN	FALSE	FALSE	FALSE	prs
Cluster-26641.2384	2.895	1.3325	1.855	2.3	2.8225	UP	FALSE	FALSE	FALSE	serine..threonine-protein kinase BRSK2 isoform X1
Cluster-26641.23840	26.7325	4.67	5.0275	9.585	4.68	UP	FALSE	FALSE	FALSE	cuticle protein 7-like
Cluster-26641.23848	9.345	3.1725	2.6175	3.4325	3.3775	UP	FALSE	FALSE	FALSE	maltase A1
Cluster-26641.23849	6.3975	0.6425	0.58	1.4775	0.0875	FALSE	FALSE	FALSE	UP	uncharacterized protein LOC100166601 precursor
Cluster-26641.23858	110.845	10.91	122.233	214.145	123.987	UP	DOWN	FALSE	FALSE	uncharacterized protein LOC100570877
Cluster-26641.23879	3.105	1.275	0.9325	0.9925	1.445	UP	FALSE	FALSE	FALSE	uncharacterized protein LOC107162507
Cluster-26641.24008	1.345	1.0925	0.6125	1.3475	1.705	FALSE	FALSE	DOWN	FALSE	neuropeptide SIFamide receptor-like
Cluster-26641.24092	0.735	0.4125	0.3475	0.8225	0.2975	FALSE	FALSE	FALSE	UP	RNA-directed DNA polymerase from mobile element jockey-like
Cluster-26641.2410	0.3775	0.3025	1.0275	0.79	0.8125	FALSE	DOWN	FALSE	FALSE	zinc finger protein 91-like
Cluster-26641.24177	0.24	0.555	1.315	1.8775	1.4825	FALSE	DOWN	FALSE	FALSE	zinc finger MYM-type protein 1-like
Cluster-26641.2419	18.12	17.915	28.19	12.9875	8.265	FALSE	FALSE	UP	FALSE	glucose dehydrogenase
Cluster-26641.24264	1.1425	1.7025	1.595	0.705	0.8375	FALSE	FALSE	UP	FALSE	uncharacterized protein LOC103309579
Cluster-26641.24439	0.69	0.575	0.1425	0.41	0.4925	FALSE	UP	FALSE	FALSE	zinc finger MYM-type protein 1-like
Cluster-26641.24552	0.785	0.155	0.1425	0.22	0.2675	UP	FALSE	FALSE	FALSE	pickpocket protein 11-like isoform X2
Cluster-26641.24553	0.58	0.1375	0.1225	0.1775	0.2	UP	FALSE	FALSE	FALSE	sodium channel protein Nach-like
Cluster-26641.2461	4.4275	1.4925	1.3975	1.875	1.3275	UP	FALSE	FALSE	FALSE	scavenger receptor class B member 1-like isoform X3
Cluster-26641.2465	3.72	19.0925	18.0475	17.6525	9.84	DOWN	FALSE	FALSE	FALSE	UDP-glucuronosyl transferase 344J2
Cluster-26641.24707	0.3025	0.74	0.995	0.845	0.8525	DOWN	FALSE	FALSE	FALSE	fork head domain-containing protein crocodile-like
Cluster-26641.24724	0.365	0.03	0.76	0.21	0.1625	FALSE	DOWN	FALSE	FALSE	Kv channel-interacting protein 4-like isoform X2
Cluster-26641.24822	4.2075	1.695	1.2825	1.65	1.72	UP	FALSE	FALSE	FALSE	bestrophin-2-like
Cluster-26641.24870	0.195	0.395	1.385	2.03	2.0175	FALSE	DOWN	FALSE	FALSE	uncharacterized protein LOC111033387
Cluster-26641.24934	3.2575	5.4575	9.8825	3.4325	3.31	FALSE	FALSE	UP	FALSE	uncharacterized protein LOC111039205 isoform X1
Cluster-26641.25068	0.53	0.52	7.68	2.96	3.065	FALSE	DOWN	UP	FALSE	endothelin-converting enzyme homolog
Cluster-26641.25069	0.1275	0.1725	2.295	0.96	0.785	FALSE	DOWN	FALSE	FALSE	neprilysin-11
Cluster-26641.25070	0.02	0.1475	2.7525	0.2725	0.0075	FALSE	FALSE	FALSE	UP	chromosome-associated kinesin KIF4A isoform X2
Cluster-26641.25116	0.0475	0.1075	2.2825	0.2525	0	FALSE	FALSE	FALSE	UP	DNA damage-binding protein 1
Cluster-26641.25164	0.0125	0.1575	3.5975	0.4075	0.0025	FALSE	FALSE	FALSE	UP	importin beta-2
Cluster-26641.25223	0.015	0.16	2.4425	0.21	0.0025	FALSE	FALSE	FALSE	UP	single-stranded DNA-binding protein 3
Cluster-26641.25231	2.065	1.0025	2.3375	2.725	0.4325	FALSE	FALSE	FALSE	UP	dnaJ homolog subfamily C member 13
Cluster-26641.25312	0.0175	0.2375	2.4025	0.4275	0.0125	FALSE	FALSE	FALSE	UP	mevalonate kinase
Cluster-26641.2532	1.04	0.3325	0.2525	0.7525	1.095	UP	FALSE	FALSE	FALSE	uncharacterized protein LOC107885917
Cluster-26641.25320	0.0375	0.45	3.73	0.785	0	FALSE	FALSE	FALSE	UP	uncharacterized protein LOC105223575
Cluster-26641.2533	0.85	0.3125	0.2025	0.7475	0.7425	FALSE	FALSE	DOWN	FALSE	uncharacterized protein LOC103310259
Cluster-26641.25359	1.24	0.29	0.1275	0.17	0.3325	UP	FALSE	FALSE	FALSE	uncharacterized protein LOC111030543 isoform X1
Cluster-26641.2536	1.3625	0.505	0.45	0.7975	1.055	UP	FALSE	FALSE	FALSE	uncharacterized protein LOC111040185 isoform X2
Cluster-26641.25439	0	0.0075	1.1225	0.0525	0.01	FALSE	DOWN	FALSE	FALSE	DNA polymerase V
Cluster-26641.25729	3.87	0.26	0.165	0.1825	0.415	UP	FALSE	FALSE	FALSE	dynein intermediate chain 3, ciliary-like
Cluster-26641.25731	11.755	8.3875	4.58	10.075	8.2975	FALSE	FALSE	DOWN	FALSE	uncharacterized protein LOC107165482
Cluster-26641.2576	1.165	2.74	1.845	1.3875	0.985	DOWN	FALSE	FALSE	FALSE	uncharacterized protein LOC103309069
Cluster-26641.25803	3.115	2.0225	12.235	31.625	0.67	FALSE	FALSE	FALSE	UP	uncharacterized protein LOC100166479
Cluster-26641.25827	0.225	1.7875	4.03	3.2775	1.655	DOWN	FALSE	FALSE	FALSE	uncharacterized protein LOC100575398 isoform X1
Cluster-26641.2586	0.225	5.2725	42.755	10.2875	0.085	FALSE	FALSE	FALSE	UP	histone H1-like
Cluster-26641.2592	0.9625	2.0925	2.1775	2.4875	1.4375	DOWN	FALSE	FALSE	FALSE	uncharacterized protein LOC100159753
Cluster-26641.25940	0.23	0.2975	0.73	0.885	0.76	FALSE	DOWN	FALSE	FALSE	uncharacterized protein LOC111031989
Cluster-26641.25947	1.6325	3.4975	3.075	3.1	2.555	DOWN	FALSE	FALSE	FALSE	uncharacterized protein LOC105396921
Cluster-26641.2616	0.025	0.7375	7.6225	0.995	0.1675	DOWN	FALSE	FALSE	FALSE	serine hydroxymethyltransferase, cytosolic isoform X1
Cluster-26641.26175	2.0175	0.6875	2.5925	2.2225	2.1975	FALSE	DOWN	FALSE	FALSE	chemosensory protein 10
Cluster-26641.26253	0.9575	0.8	1.7275	2.5675	2.7175	FALSE	DOWN	FALSE	FALSE	homeobox protein orthopedia
Cluster-26641.26293	0.2525	0.175	0.21	0.5725	0.8125	FALSE	FALSE	DOWN	FALSE	LOW QUALITY PROTEIN: EF-hand domain-containing family member C2-like
Cluster-26641.26310	1.2525	0.105	0.2325	0.1825	0.1125	UP	FALSE	FALSE	FALSE	uncharacterized protein LOC100169243
Cluster-26641.2634	0.465	0.085	0.035	0.3125	0.225	FALSE	FALSE	DOWN	FALSE	leucine-rich repeat extensin-like protein 5
Cluster-26641.2669	2.72	4.9775	3.8125	1.88	1.8175	FALSE	FALSE	UP	FALSE	uncharacterized protein LOC107883329
Cluster-26641.2771	1.83	0.64	0.8325	0.5825	0.6325	UP	FALSE	FALSE	FALSE	tigger transposable element-derived protein 6-like
Cluster-26641.278	5.8425	11.81	8.0975	10.1125	2.635	FALSE	FALSE	FALSE	UP	uncharacterized protein LOC111033089
Cluster-26641.2801	3.295	5.2925	8.055	6.1075	2.7175	FALSE	FALSE	FALSE	UP	sideroflexin-like isoform X1
Cluster-26641.2822	6.0425	8.2025	19.81	5.135	3.055	FALSE	FALSE	UP	FALSE	uncharacterized protein LOC107883010
Cluster-26641.2839	7.375	1.8925	1.7175	2.245	2.1425	UP	FALSE	FALSE	FALSE	cuticle protein 19-like
Cluster-26641.289	1.2525	0.8925	1.8025	2.095	2.705	FALSE	DOWN	FALSE	FALSE	homeobox protein 5-like
Cluster-26641.2916	21.9175	1.3175	0.9375	2.4375	0.205	FALSE	FALSE	FALSE	UP	ACYPI000294
Cluster-26641.2920	0.77	0.2275	0.2825	0.465	0.405	UP	FALSE	FALSE	FALSE	zinc finger protein 665-like
Cluster-26641.2937	17.275	17.32	8.15	7.92	7.6875	FALSE	UP	FALSE	FALSE	lactase-phlorizin hydrolase isoform X1
Cluster-26641.2988	4.0225	0.4	1.71	2.0575	2.0625	UP	FALSE	FALSE	FALSE	uncharacterized protein LOC111026863 isoform X1
Cluster-26641.3006	4.24	1.655	1.11	1.9375	1.01	UP	FALSE	FALSE	FALSE	LIM domain-binding protein 3-like
Cluster-26641.3009	37.3375	37.34	16.4675	13.1875	13.205	FALSE	UP	FALSE	FALSE	fatty acid synthase-like
Cluster-26641.3015	7.15	4.8775	1.7975	3.5625	3.5525	FALSE	UP	FALSE	FALSE	DNA N6-methyl adenine demethylase-like
Cluster-26641.3096	23.7475	24.0425	25.87	11.5125	8.9425	FALSE	FALSE	UP	FALSE	vesicular glutamate transporter 1
Cluster-26641.3106	11	5.15	1.455	3.6525	5.4525	UP	UP	DOWN	FALSE	histone H3.2
Cluster-26641.3110	3.33	1.3775	1.115	1.9725	2.3725	UP	FALSE	FALSE	FALSE	uncharacterized protein LOC111029433
Cluster-26641.3129	0.8675	0.325	0.355	0.545	0.595	UP	FALSE	FALSE	FALSE	uncharacterized protein LOC107168164
Cluster-26641.313	0.375	0.4875	0.995	1.035	0.8025	FALSE	DOWN	FALSE	FALSE	uncharacterized protein LOC100572519
Cluster-26641.3136	12.4925	7.96	8.265	3.1	5.8325	FALSE	FALSE	UP	FALSE	UDP-glucuronosyl transferase 329A3
Cluster-26641.3138	3.075	1.05	0.365	0.965	1.2525	UP	FALSE	FALSE	FALSE	uncharacterized protein LOC107883313
Cluster-26641.3145	0.86	0.32	0.2075	0.325	0.375	UP	FALSE	FALSE	FALSE	armadillo repeat-containing protein gudu-like
Cluster-26641.3186	9.9775	4.225	4.72	7.35	6.935	UP	FALSE	FALSE	FALSE	solute carrier organic anion transporter family member 4C1
Cluster-26641.3218	3.0325	2.31	3.1525	1.4825	1.18	FALSE	FALSE	UP	FALSE	uncharacterized protein LOC107165935
Cluster-26641.3226	7.9325	6.575	2.5825	2.3075	2.445	FALSE	UP	FALSE	FALSE	uncharacterized protein LOC107161656
Cluster-26641.3248	0.79	0.3325	0.24	0.285	0.275	UP	FALSE	FALSE	FALSE	transcriptional regulator ATRX homolog
Cluster-26641.3299	12.9175	10.3475	10.7	18.8175	7.475	FALSE	FALSE	FALSE	UP	monocarboxylate transporter 9 isoform X1
Cluster-26641.3300	5.38	4.335	4.235	8.105	3.18	FALSE	FALSE	FALSE	UP	monocarboxylate transporter 7-like isoform X2
Cluster-26641.331	8.2925	2.555	1.2475	3.285	2.4175	UP	FALSE	DOWN	FALSE	nuclear hormone receptor FTZ-F1 isoform X1
Cluster-26641.3322	4.7225	2.0625	2.99	3.985	5.0025	UP	FALSE	FALSE	FALSE	tip elongation aberrant protein 1
Cluster-26641.3360	1.3375	2.6675	2.435	2.31	2.3175	DOWN	FALSE	FALSE	FALSE	protein decapentaplegic-like
Cluster-26641.3394	43.605	14.6375	13.56	22.6575	5.6175	UP	FALSE	FALSE	UP	cuticle protein 8-like
Cluster-26641.3396	0.6425	0.1925	0.28	0.45	0.365	UP	FALSE	FALSE	FALSE	ras-related protein Rab-28-like
Cluster-26641.3444	0.5075	1.6775	2.055	0.3525	0.415	DOWN	FALSE	UP	FALSE	carboxylesterase
Cluster-26641.3445	1.53	1.1125	1.585	5.3925	5.12	FALSE	FALSE	DOWN	FALSE	serpin B3-like
Cluster-26641.3458	3.39	1.5925	0.9875	1.43	1.7125	UP	FALSE	FALSE	FALSE	uncharacterized protein LOC111034754 isoform X4
Cluster-26641.3459	0.2425	0.05	0.0325	0.315	0.34	FALSE	FALSE	DOWN	FALSE	uncharacterized protein LOC100573291
Cluster-26641.351	0.5725	0.115	0.1975	0.235	0.4525	UP	FALSE	FALSE	FALSE	zinc finger protein OZF-like, partial
Cluster-26641.3528	0.6475	0.3925	0.33	0.7825	0.79	FALSE	FALSE	DOWN	FALSE	prolyl 4-hydroxylase subunit alpha-1-like
Cluster-26641.3577	1.7425	0.815	0.6625	0.945	0.485	UP	FALSE	FALSE	UP	uncharacterized protein LOC111042268
Cluster-26641.3621	1.9925	1.24	0.9325	2.08	2.075	FALSE	FALSE	DOWN	FALSE	protein unc-80 homolog isoform X1
Cluster-26641.3646	28.955	30.8025	32.645	39.1325	15.45	FALSE	FALSE	FALSE	UP	alpha-tocopherol transfer protein-like
Cluster-26641.3656	1.805	0.7025	0.5675	0.49	0.585	UP	FALSE	FALSE	FALSE	protein virilizer homolog
Cluster-26641.366	0.0375	0.6925	5.95	0.86	0.0075	FALSE	FALSE	FALSE	UP	histone H1-I-like
Cluster-26641.3672	0.745	0.7825	0.2525	0.4525	0.5225	FALSE	UP	FALSE	FALSE	tubulin beta chain-like
Cluster-26641.3673	9.63	1.715	0.9125	1.425	2.7375	UP	FALSE	FALSE	FALSE	glycine-rich cell wall structural protein 1.8-like
Cluster-26641.3674	3.5475	0.6125	0.205	0.455	0.4525	UP	FALSE	FALSE	FALSE	loricrin
Cluster-26641.3677	22.3725	11.6825	9.7825	17.7675	6.745	FALSE	FALSE	FALSE	UP	chorion peroxidase-like
Cluster-26641.3712	0.845	0.4025	0.19	0.175	0.2325	UP	FALSE	FALSE	FALSE	uncharacterized protein LOC103311416
Cluster-26641.3729	1.0725	0.3375	0.23	0.2375	0.435	UP	FALSE	FALSE	FALSE	pickpocket protein 28-like
Cluster-26641.3730	7.9025	2.7425	1.5575	3.235	2.49	UP	FALSE	FALSE	FALSE	laccase-7 isoform X1
Cluster-26641.3745	24.39	0	0	0	0	UP	FALSE	FALSE	FALSE	polyprotein, partial
Cluster-26641.3748	14.31	6.5325	4.0325	8.775	3.4925	UP	FALSE	FALSE	UP	fatty acid synthase-like
Cluster-26641.3752	25.1625	0	0	0	0	UP	FALSE	FALSE	FALSE	RNA-dependent RNA polymerase, partial
Cluster-26641.3759	14.185	3.62	5.6825	5.8475	2.855	UP	FALSE	FALSE	UP	uncharacterized protein LOC111031535 isoform X2
Cluster-26641.3782	0.6975	0.1725	0.7325	2.2175	2.165	UP	DOWN	DOWN	FALSE	myelin regulatory factor-like protein isoform X2
Cluster-26641.3835	2.8425	0.7475	0.2525	0.265	0.385	UP	UP	FALSE	FALSE	protein FAM200A-like
Cluster-26641.3844	1.5725	3.02	4.2925	4.74	4.5225	DOWN	FALSE	FALSE	FALSE	hypothetical protein OCBIM_22024736mg
Cluster-26641.3845	23.1625	6.9025	1.95	5.6375	6.06	UP	FALSE	FALSE	FALSE	cyclic nucleotide-gated cation channel beta-1-like
Cluster-26641.3868	5.76	0.325	0.2325	1.2525	0.04	FALSE	FALSE	FALSE	UP	helicase SRCAP-like
Cluster-26641.3980	22.5175	25.035	23.56	11.9375	11.93	FALSE	FALSE	UP	FALSE	pollen-specific leucine-rich repeat extensin-like protein 2
Cluster-26641.3982	17.1475	19.2325	24.885	6.27	3.155	FALSE	FALSE	UP	UP	extensin-2-like
Cluster-26641.3996	2.0125	1.2375	0.4625	0.47	0.6825	FALSE	UP	FALSE	FALSE	uncharacterized protein LOC107882959 isoform X1
Cluster-26641.4032	2.6925	1.91	2.0725	3.7775	1.4325	FALSE	FALSE	FALSE	UP	chemosensory protein
Cluster-26641.4046	3.77	5.0325	9.075	3.22	4.52	FALSE	FALSE	UP	FALSE	transmembrane protease serine 9-like
Cluster-26641.4048	2.4775	0.92	0.75	1.99	2.49	UP	FALSE	DOWN	FALSE	coiled-coil domain-containing protein 170 isoform X1
Cluster-26641.4059	34.6825	24.0725	19.4575	19.24	3.885	FALSE	FALSE	FALSE	UP	putative uncharacterized protein DDB_G0282129
Cluster-26641.4112	2.285	1.475	0.5775	0.785	1.17	FALSE	UP	FALSE	FALSE	uncharacterized protein LOC107165693
Cluster-26641.4126	0.49	0.2375	0.175	0.545	0.745	FALSE	FALSE	DOWN	FALSE	pickpocket protein 28-like isoform X1
Cluster-26641.4153	1.7125	0.0975	0.095	0.4425	0.0575	UP	FALSE	FALSE	FALSE	skin secretory protein xP2-like precursor
Cluster-26641.4179	1.0875	2.2375	2.2775	2.48	2.5025	DOWN	FALSE	FALSE	FALSE	forkhead box protein D3-A
Cluster-26641.4182	2.3825	1.7025	1.1575	0.9575	2.29	FALSE	FALSE	FALSE	DOWN	odorant-binding protein BP10
Cluster-26641.4186	37.1725	43.3475	59.75	38.2675	6.06	FALSE	FALSE	FALSE	UP	uncharacterized protein LOC111039542
Cluster-26641.4233	3.315	3.6275	2.92	1.175	1.2075	FALSE	FALSE	UP	FALSE	uncharacterized protein LOC111620395
Cluster-26641.424	2.2875	1.0275	1.385	1.455	3.1025	UP	FALSE	FALSE	DOWN	uncharacterized protein LOC111041360
Cluster-26641.4240	14.89	15.97	44.53	7.58	4.545	FALSE	FALSE	UP	FALSE	antitrypsin-like
Cluster-26641.4264	3.4325	2.265	0.9175	1.88	2.1525	FALSE	UP	FALSE	FALSE	GATA zinc finger domain-containing protein 10 isoform X2
Cluster-26641.4287	25.6825	10.715	29.98	12.1725	6.6675	FALSE	DOWN	FALSE	FALSE	ACYPI001038
Cluster-26641.4290	0.6475	0.295	0.3675	0.5475	0.6575	UP	FALSE	FALSE	FALSE	centrosomal protein of 290 kDa-like isoform X1
Cluster-26641.4323	10.1175	9.03	8.4175	4.2975	1.82	FALSE	FALSE	FALSE	UP	glucose dehydrogenase
Cluster-26641.4326	15.0525	5.6	4.5725	4.2575	3.2425	UP	FALSE	FALSE	FALSE	uncharacterized protein LOC111041243
Cluster-26641.4332	5.025	1.2775	2.2425	1.705	1.4	UP	FALSE	FALSE	FALSE	hornerin isoform X2
Cluster-26641.4333	3.265	0.445	0.97	0.6775	0.3975	UP	FALSE	FALSE	FALSE	hornerin isoform X1
Cluster-26641.4340	5.675	5.785	40.3425	66.455	0.7375	FALSE	FALSE	FALSE	UP	cuticular protein-like precursor
Cluster-26641.4349	13.145	3.11	2.86	5.0375	8.665	UP	FALSE	FALSE	FALSE	uncharacterized protein LOC111035063
Cluster-26641.4350	6.3775	3.845	10.1275	6	2.18	FALSE	DOWN	FALSE	UP	early nodulin-75-like isoform X3
Cluster-26641.4381	2.41	6.2075	6.3275	6.69	3.2175	DOWN	FALSE	FALSE	UP	thiamine transporter 2-like
Cluster-26641.4418	0.58	0.225	0.2325	0.5025	0.7675	UP	FALSE	FALSE	FALSE	polycystin-2-like isoform X2
Cluster-26641.4419	9.5475	4.025	1.5725	2.7725	2.6975	UP	FALSE	FALSE	FALSE	filaggrin-like
Cluster-26641.4445	82.355	39.9325	24.37	57.6675	32.6425	UP	FALSE	FALSE	FALSE	cuticular protein 20 precursor
Cluster-26641.445	5.285	2.3475	2.4375	3.4175	3.12	UP	FALSE	FALSE	FALSE	uncharacterized protein LOC111036173
Cluster-26641.4468	2.3175	0	0.15	0.195	0	UP	FALSE	FALSE	FALSE	ribosomal protein S27-2
Cluster-26641.4489	15.4925	0.845	1.44	2.1475	0	UP	FALSE	FALSE	FALSE	60S ribosomal protein L15
Cluster-26641.4497	2.0525	0.4875	0.46	0.4225	0.75	UP	FALSE	FALSE	FALSE	uncharacterized protein K02A2.6-like isoform X2
Cluster-26641.45	0.5675	2.2075	1.4925	0.955	0.73	DOWN	FALSE	FALSE	FALSE	bifunctional lycopene cyclase..phytoene synthase-like
Cluster-26641.4504	3.7975	4.9975	6.035	7.64	3.8875	FALSE	FALSE	FALSE	UP	alpha-protein kinase 1-like
Cluster-26641.4508	2.19	4.725	4.535	4.7675	4.6975	DOWN	FALSE	FALSE	FALSE	uncharacterized protein LOC100575208
Cluster-26641.4525	24.1925	2.1375	2.2375	3.035	1.5	UP	FALSE	FALSE	FALSE	60S acidic ribosomal protein P1
Cluster-26641.4583	7.5	0.65	0.4025	2.1275	0.135	FALSE	FALSE	FALSE	UP	RR1 cuticle protein 1 precursor
Cluster-26641.4595	4.3125	1.855	1.0325	2.1525	2.33	UP	FALSE	FALSE	FALSE	uncharacterized protein LOC100166917
Cluster-26641.4596	0.845	0.2275	0.09	0.17	0.295	UP	FALSE	FALSE	FALSE	uncharacterized protein LOC111033206
Cluster-26641.4629	5.8625	0.3425	0.36	1.1775	0.2375	UP	FALSE	FALSE	FALSE	ATP-dependent RNA helicase p62 isoform X1
Cluster-26641.4682	0.01	0	5.3525	0.0475	0	FALSE	FALSE	UP	FALSE	vitellogenin receptor
Cluster-26641.4724	1.535	0.985	3.755	0.82	1.32	FALSE	FALSE	UP	FALSE	myosin heavy chain, muscle
Cluster-26641.4763	0.055	0.7625	11.42	0.9625	0.03	FALSE	FALSE	FALSE	UP	inositol-trisphosphate 3-kinase homolog
Cluster-26641.4765	19.18	12.2	13.58	13.45	5.685	FALSE	FALSE	FALSE	UP	scavenger receptor class B member 1-like isoform X1
Cluster-26641.4796	5.245	1.02	1.2975	1.81	1.4325	UP	FALSE	FALSE	FALSE	uncharacterized protein LOC111030440
Cluster-26641.4805	0.1375	0.245	1.63	4.2125	2.225	FALSE	DOWN	DOWN	FALSE	uncharacterized protein LOC111026427
Cluster-26641.4916	7.0825	14.7225	17.8925	15.4075	13.775	DOWN	FALSE	FALSE	FALSE	reversion-inducing cysteine-rich protein with Kazal motifs
Cluster-26641.4952	9.2375	4.79	10.36	6.0325	2.94	FALSE	FALSE	FALSE	UP	zinc metalloproteinase nas-13
Cluster-26641.4994	17.5975	17.375	14.82	5.7225	7.2775	FALSE	FALSE	UP	FALSE	UDP-glucuronosyl transferase 342C2
Cluster-26641.4995	4.635	2.27	2.2975	3.96	1.0925	FALSE	FALSE	FALSE	UP	neuromedin-U receptor 2-like isoform X2
Cluster-26641.5019	8.585	6.995	3.1075	2.6	4.265	FALSE	UP	FALSE	FALSE	bifunctional lycopene cyclase..phytoene synthase-like
Cluster-26641.5054	47.3425	73.605	49.2275	46.71	8.62	FALSE	FALSE	FALSE	UP	uncharacterized protein LOC111030510
Cluster-26641.5056	0.4325	0.0725	0.1425	0.335	0.4475	UP	FALSE	FALSE	FALSE	cytosolic carboxypeptidase 6
Cluster-26641.5061	118.955	43.9575	36.415	83.615	36.79	UP	FALSE	FALSE	UP	ACYPI45536
Cluster-26641.5071	1.1425	0.4975	0.2375	0.3525	0.285	UP	FALSE	FALSE	FALSE	dynein heavy chain 5, axonemal
Cluster-26641.5089	3.4475	1.5425	0.58	1.3525	3.125	UP	FALSE	FALSE	DOWN	fatty acyl-CoA reductase wat-like
Cluster-26641.5103	2.175	0.49	0.25	0.8775	0.355	UP	FALSE	FALSE	UP	neutral ceramidase isoform X2
Cluster-26641.511	0.315	0.79	2.7925	9.965	9.67	FALSE	DOWN	DOWN	FALSE	hydroxysteroid dehydrogenase-like protein 2
Cluster-26641.5167	19.935	4.9025	3.405	9.8475	0.765	UP	FALSE	FALSE	UP	ACYPI009260
Cluster-26641.517	6.4125	3.4525	1.0075	2.4	2.625	FALSE	UP	FALSE	FALSE	hyphally regulated cell wall protein 3
Cluster-26641.5202	13.5975	4.555	4.295	6.2025	2.12	UP	FALSE	FALSE	UP	cuticle protein 7-like
Cluster-26641.5210	1.83	1.48	1.2175	3.73	4.115	FALSE	FALSE	DOWN	FALSE	uncharacterized protein LOC107172541, partial
Cluster-26641.5213	0.8325	1.0025	0.4475	0.8675	1.08	FALSE	UP	FALSE	FALSE	uncharacterized protein LOC111030207
Cluster-26641.5230	45.125	135.178	82.425	59.1175	48.6625	DOWN	FALSE	FALSE	FALSE	legumain
Cluster-26641.5231	7.2725	14.8175	9.83	7.21	6.585	DOWN	FALSE	FALSE	FALSE	legumain
Cluster-26641.5232	0.07	0.4	0.1875	0.345	0.32	DOWN	FALSE	FALSE	FALSE	uncharacterized protein LOC111029687
Cluster-26641.5255	0.13	0.24	1.03	1.9625	2.62	FALSE	DOWN	FALSE	FALSE	sterile alpha and TIR motif-containing protein 1-like
Cluster-26641.5260	0.8475	4.44	2.9725	2.835	2.7425	DOWN	FALSE	FALSE	FALSE	dihydroxyacetone kinase 1-like
Cluster-26641.5262	9.7225	2.4875	2.3775	4.545	2.435	UP	FALSE	FALSE	FALSE	putative fatty acyl-CoA reductase CG5065
Cluster-26641.5263	1.1425	0.405	0.0925	0.555	0.5775	UP	UP	DOWN	FALSE	putative fatty acyl-CoA reductase CG5065
Cluster-26641.528	4.2075	9.1675	5.4075	20.6575	0.54	FALSE	FALSE	FALSE	UP	ACYPI005742
Cluster-26641.5293	0.2325	0.6325	0.6175	0.6975	0.2525	DOWN	FALSE	FALSE	FALSE	hypothetical protein
Cluster-26641.5308	1.2875	0.77	0.485	1.075	1.2925	FALSE	FALSE	DOWN	FALSE	dopamine receptor 2
Cluster-26641.532	5.5625	12.615	10.685	6.96	5.0875	DOWN	FALSE	FALSE	FALSE	bone morphogenetic protein 4
Cluster-26641.5322	2.4225	1.995	1.725	3.8825	4.6175	FALSE	FALSE	DOWN	FALSE	probable G-protein coupled receptor 158 isoform X1
Cluster-26641.5353	14.1225	3.2575	1.84	3.825	3.7275	UP	FALSE	FALSE	FALSE	cuticle protein 63-like isoform X2
Cluster-26641.540	0.0175	0.3725	4.6725	0.73	0.0125	FALSE	FALSE	FALSE	UP	ubiquitin-conjugating enzyme E2 C
Cluster-26641.5416	2.37	9.11	30.5825	45.7175	35.905	DOWN	DOWN	FALSE	FALSE	leucine-rich repeat extensin-like protein 5
Cluster-26641.5466	57.455	9.93	11.73	12.4625	1.265	UP	FALSE	FALSE	UP	DNA-directed RNA polymerase II subunit RPB1-like
Cluster-26641.5469	0.125	0.0325	0.0875	0.2575	0.1525	FALSE	FALSE	DOWN	FALSE	zinc finger protein 395-like isoform X1
Cluster-26641.5478	28.22	20.28	24.3175	9.75	8.58	FALSE	FALSE	UP	FALSE	uncharacterized protein LOC111033934 isoform X2
Cluster-26641.548	1.2	0.985	0.3725	0.7425	0.895	FALSE	UP	FALSE	FALSE	uncharacterized protein LOC100568712
Cluster-26641.5484	3.8875	2.5525	1.1225	2.415	3.605	FALSE	UP	FALSE	FALSE	uncharacterized protein LOC103309208
Cluster-26641.5496	16.2775	16.1675	5.775	6.235	5.0725	FALSE	UP	FALSE	FALSE	facilitated trehalose transporter Tret1-like
Cluster-26641.5499	0.42	1.715	1.7475	1.6175	1.8525	DOWN	FALSE	FALSE	FALSE	homeobox protein goosecoid-like
Cluster-26641.5511	6.615	2.6025	3.1475	5.4925	5.9175	UP	FALSE	FALSE	FALSE	fatty acyl-CoA reductase 1
Cluster-26641.5512	3.1925	1.8975	1.1575	2.785	3.3625	FALSE	FALSE	DOWN	FALSE	neuropeptide FF receptor 2-like
Cluster-26641.5517	0.5325	1.475	9.12	20.7275	42.4375	FALSE	DOWN	DOWN	FALSE	chemosensory protein 8
Cluster-26641.5526	0.6525	0.245	0.2875	0.63	0.57	UP	FALSE	FALSE	FALSE	sex peptide receptor
Cluster-26641.5535	1.2625	1.005	0.4825	2.305	2.3525	FALSE	UP	DOWN	FALSE	ATP-binding cassette sub-family C member Sur-like
Cluster-26641.5567	1.485	0.63	0.51	1.0775	1.25	UP	FALSE	FALSE	FALSE	52 kDa repressor of the inhibitor of the protein kinase-like
Cluster-26641.5580	2.2825	0.7475	1.83	1.34	1.6975	UP	DOWN	FALSE	FALSE	zinc finger protein OZF-like
Cluster-26641.5585	6.2325	3.1925	4.14	4.8675	1.8475	FALSE	FALSE	FALSE	UP	zinc finger protein 512B-like
Cluster-26641.559	0.165	0.4425	0.295	0.31	1.4975	DOWN	FALSE	FALSE	DOWN	hypothetical protein D910_00242
Cluster-26641.5611	0.04	2.6725	1.23	5.1125	0.105	DOWN	FALSE	FALSE	FALSE	gamma-glutamyltranspeptidase 1-like
Cluster-26641.5618	11.4925	114.387	37.1975	0.02	1.65	DOWN	FALSE	FALSE	FALSE	IP15837p
Cluster-26641.5623	11.77	2.075	32.16	10.99	11.9375	FALSE	DOWN	FALSE	FALSE	inositol oxygenase
Cluster-26641.5632	13.6125	17.1925	12.475	6.595	7.8875	FALSE	FALSE	UP	FALSE	sodium-independent sulfate anion transporter-like
Cluster-26641.5636	4.69	1.4	1.145	1.62	1.315	UP	FALSE	FALSE	FALSE	uncharacterized protein LOC100158751 isoform X1
Cluster-26641.5656	13.445	6.095	5.1675	6.4825	9.435	UP	FALSE	FALSE	FALSE	uncharacterized protein LOC100572954
Cluster-26641.5660	3.5425	1.4725	2.0925	2.055	1.4725	UP	FALSE	FALSE	FALSE	uncharacterized protein LOC100161176
Cluster-26641.5661	22.545	9.7425	7.33	12.3225	7.7175	UP	FALSE	FALSE	FALSE	uncharacterized protein LOC111029880
Cluster-26641.5676	1.2125	0.49	0.66	1.9475	1.8325	FALSE	FALSE	DOWN	FALSE	uncharacterized protein LOC111029435
Cluster-26641.5677	20.6975	7.025	6.8825	8.6475	7.62	UP	FALSE	FALSE	FALSE	putative uncharacterized protein DDB_G0271606
Cluster-26641.5693	28.86	11.0525	7.51	12.995	7.6425	UP	FALSE	FALSE	FALSE	aminopeptidase N
Cluster-26641.5706	22.9325	10.52	8.1925	17.59	15.525	UP	FALSE	FALSE	FALSE	serine protease inhibitor 88Ea-like
Cluster-26641.5732	6.445	7.3375	7.8025	4.045	3.57	FALSE	FALSE	UP	FALSE	uncharacterized protein LOC100571964
Cluster-26641.5734	0.4875	1.4175	4.2	4.86	2.0775	DOWN	DOWN	FALSE	UP	uncharacterized protein LOC111031943 isoform X1
Cluster-26641.578	0.3575	1.2325	0.9675	0.8625	0.695	DOWN	FALSE	FALSE	FALSE	AP endonuclease
Cluster-26641.5796	2.1525	1.5125	0.9125	2.1775	2.4225	FALSE	FALSE	DOWN	FALSE	uncharacterized protein LOC111027697
Cluster-26641.5816	1.1675	1.4775	3.6375	4.0425	3.745	FALSE	DOWN	FALSE	FALSE	putative uncharacterized protein DDB_G0291608 isoform X2
Cluster-26641.5829	15.1975	7.4675	3.705	12.88	9.2675	FALSE	FALSE	DOWN	FALSE	putative fatty acyl-CoA reductase CG5065
Cluster-26641.5834	6.0325	3.63	2.745	6.015	6.49	FALSE	FALSE	DOWN	FALSE	uncharacterized protein LOC111041703 isoform X1
Cluster-26641.5858	31.8875	9.6625	4.7075	12.8725	5.22	UP	FALSE	FALSE	UP	uncharacterized protein LOC107172909
Cluster-26641.586	4.9375	4.1225	8.22	10.305	12.875	FALSE	DOWN	FALSE	FALSE	LIM..homeobox protein Lhx3 isoform X1
Cluster-26641.5888	3.3475	1.505	1.045	1.98	2.0875	UP	FALSE	FALSE	FALSE	cuticle protein 7
Cluster-26641.5899	9.5325	3.105	5.1125	6.2225	7.3325	UP	FALSE	FALSE	FALSE	peroxidase-like
Cluster-26641.590	2.245	0.7675	0.62	0.4775	0.4	UP	FALSE	FALSE	FALSE	uncharacterized protein LOC107884828
Cluster-26641.5909	4.2475	1.7225	1.4325	2.525	2.985	UP	FALSE	FALSE	FALSE	probable G-protein coupled receptor No18
Cluster-26641.5911	2.0325	7.61	8.765	8.625	8.4675	DOWN	FALSE	FALSE	FALSE	protein gooseberry isoform X2
Cluster-26641.5918	13.1325	7.5675	4.275	9.47	7.0075	FALSE	FALSE	DOWN	FALSE	serine proteinase stubble
Cluster-26641.5922	0.505	0.1825	0.4825	0.605	0.7475	FALSE	DOWN	FALSE	FALSE	dynein regulatory complex subunit 7-like
Cluster-26641.5949	2.58	8.98	12.5525	13.1575	11.805	DOWN	FALSE	FALSE	FALSE	uncharacterized protein LOC100572339
Cluster-26641.596	0.15	0.23	0.0275	0.2275	0.0975	FALSE	FALSE	DOWN	FALSE	rpoC
Cluster-26641.5964	4.6025	2.5025	3.3175	4.8675	1.1725	FALSE	FALSE	FALSE	UP	cuticle protein 7-like
Cluster-26641.5968	6.77	2.4775	1.075	2.0025	2.2225	UP	FALSE	FALSE	FALSE	cuticle protein 19-like
Cluster-26641.6004	116.863	46.7175	23.86	66.6825	31.5775	UP	FALSE	FALSE	UP	cuticle protein 12.5-like
Cluster-26641.6012	36.185	12.1925	7.265	15.7575	10.6175	UP	FALSE	FALSE	FALSE	ABC transporter G family member 23
Cluster-26641.6018	4.8075	2.835	1.64	4.39	5.455	FALSE	FALSE	DOWN	FALSE	uncharacterized protein LOC111031432
Cluster-26641.6090	0.7675	0.3575	0.195	0.4375	0.52	UP	FALSE	DOWN	FALSE	dynein beta chain, ciliary-like
Cluster-26641.6099	0.5325	0.5275	0.13	0.63	0.48	FALSE	FALSE	DOWN	FALSE	uncharacterized protein LOC111028193 isoform X1
Cluster-26641.6101	5.23	10.8725	13.66	9.4725	7.77	DOWN	FALSE	FALSE	FALSE	repressed by EFG1 protein 1-like
Cluster-26641.6136	16.0425	5.725	4.25	7.5625	6.735	UP	FALSE	FALSE	FALSE	bicaudal D-related protein homolog
Cluster-26641.6140	5.0475	3.8925	5.2375	2.08	2.0275	FALSE	FALSE	UP	FALSE	acyl-CoA synthetase short-chain family member 3, mitochondrial
Cluster-26641.6143	1.2775	0.7875	0.5525	1.3225	1.3225	FALSE	FALSE	DOWN	FALSE	uncharacterized protein LOC111034601
Cluster-26641.6148	1.1775	0.7	0.335	1.02	0.685	FALSE	FALSE	DOWN	FALSE	2-oxoglutarate dehydrogenase, mitochondrial isoform X2
Cluster-26641.6185	0.6225	0.3625	0.315	1.28	1.425	FALSE	FALSE	DOWN	FALSE	uncharacterized protein LOC107884772
Cluster-26641.6193	3.07	1.27	1.3225	1.225	1.625	UP	FALSE	FALSE	FALSE	uncharacterized protein LOC100571585 isoform X1
Cluster-26641.6200	62.505	52.99	60.235	24.6725	23.4625	FALSE	FALSE	UP	FALSE	alpha-N-acetylgalactosaminidase
Cluster-26641.6215	8.0075	2.5625	3.065	4.2025	2.1	UP	FALSE	FALSE	UP	uncharacterized protein LOC111028882
Cluster-26641.6268	0.42	1.3625	1.32	0.95	1.0225	DOWN	FALSE	FALSE	FALSE	uncharacterized protein LOC111034113
Cluster-26641.6277	4.5475	13.0875	14.415	13.4575	12.9325	DOWN	FALSE	FALSE	FALSE	protein Wnt-1
Cluster-26641.629	6.3675	5.4775	11.075	6.14	5.21	FALSE	DOWN	FALSE	FALSE	cytochrome P450 6CY12
Cluster-26641.63	3.93	1.3675	0.69	1.635	0.83	UP	FALSE	FALSE	FALSE	cuticle protein 19.8-like
Cluster-26641.6308	7.8125	13.375	21.7025	9.4625	9.9125	FALSE	FALSE	UP	FALSE	uncharacterized protein LOC107885178
Cluster-26641.6310	3.08	1.14	1.0575	1.03	1.725	UP	FALSE	FALSE	FALSE	probable cyclin-dependent serine..threonine-protein kinase DDB_G0292550
Cluster-26641.6337	0.07	0.1925	1.1675	0.05	1.4	FALSE	FALSE	UP	FALSE	endocuticle structural glycoprotein ABD-4
Cluster-26641.634	0.37	1.075	1.425	1.295	1.2125	DOWN	FALSE	FALSE	FALSE	ABC transporter B family member 25-like
Cluster-26641.6343	0.365	1.255	9.2425	7.48	7.46	FALSE	DOWN	FALSE	FALSE	endothelin-converting enzyme homolog
Cluster-26641.6351	33.725	8.43	6.035	12.0075	9.0225	UP	FALSE	FALSE	FALSE	uncharacterized histidine-rich protein DDB_G0274557-like
Cluster-26641.6429	11.185	6.3475	3.335	7.4675	6.3975	FALSE	FALSE	DOWN	FALSE	uncharacterized protein LOC111032949
Cluster-26641.6430	4.9725	12.2475	6.0025	4.9225	4.4	DOWN	FALSE	FALSE	FALSE	bifunctional lycopene cyclase..phytoene synthase-like
Cluster-26641.6434	0.385	0.175	0.0675	0.44	0.3625	FALSE	FALSE	DOWN	FALSE	uncharacterized protein LOC111035702
Cluster-26641.6443	0.7725	0.2775	0.22	0.27	0.435	UP	FALSE	FALSE	FALSE	uncharacterized protein LOC107883342
Cluster-26641.6447	3.845	2.37	3.1175	1.6125	1.115	FALSE	FALSE	UP	FALSE	very-long-chain 3-oxoacyl-CoA reductase-like isoform X2
Cluster-26641.6449	1.3975	2.6675	2.45	0.8925	1.08	FALSE	FALSE	UP	FALSE	venom serine carboxypeptidase-like
Cluster-26641.6465	4.515	1.285	1.4725	1.5275	0.96	UP	FALSE	FALSE	FALSE	circadian clock-controlled protein-like isoform X1
Cluster-26641.6468	0.4975	1.0025	0.895	0.8125	0.88	DOWN	FALSE	FALSE	FALSE	uncharacterized protein LOC111678948
Cluster-26641.6486	8.1725	7.1125	9.03	6.975	1.9625	FALSE	FALSE	FALSE	UP	probable chitinase 3 isoform X1
Cluster-26641.6500	9.2875	3.635	3.0225	4.205	4.9475	UP	FALSE	FALSE	FALSE	otopetrin-2-like
Cluster-26641.6513	4.44	3.805	8.1425	7.0225	8.125	FALSE	DOWN	FALSE	FALSE	insulin gene enhancer protein isl-1-like isoform X2
Cluster-26641.6548	4.27	2.325	1.4375	3.2425	3.9775	FALSE	FALSE	DOWN	FALSE	feline leukemia virus subgroup C receptor-related protein 2-like
Cluster-26641.6562	3.005	6.21	8.1175	7.3925	7.26	DOWN	FALSE	FALSE	FALSE	protein abnormal spindle-like isoform X1
Cluster-26641.6568	17.6825	17.075	11.995	23.055	6.4425	FALSE	FALSE	FALSE	UP	prolactin-releasing peptide receptor isoform X1
Cluster-26641.6569	8.6175	10.19	7.245	11.305	0.8075	FALSE	FALSE	FALSE	UP	putative uncharacterized protein DDB_G0271606
Cluster-26641.6571	3.3425	9.3075	42.38	8.8125	7.8225	DOWN	FALSE	FALSE	FALSE	heat shock protein 83
Cluster-26641.6597	22.4975	33.045	52.815	20.04	8.4775	FALSE	FALSE	UP	UP	leukocyte elastase inhibitor
Cluster-26641.6617	3.35	3.71	9.7825	11.8575	11.6	FALSE	DOWN	FALSE	FALSE	basic-leucine zipper transcription factor A
Cluster-26641.663	6.845	3.7525	2.9675	6.5525	7.5325	FALSE	FALSE	DOWN	FALSE	CCR4-NOT transcription complex subunit 7 isoform X1
Cluster-26641.6655	1.5025	0.37	0.5	0.395	0.735	UP	FALSE	FALSE	FALSE	uncharacterized protein LOC100568676
Cluster-26641.6663	13.2525	16.565	10.4525	4.92	5.52	FALSE	FALSE	UP	FALSE	troponin C, isoform 1-like isoform X2
Cluster-26641.6671	2.695	1.2475	0.24	0.6375	0.51	UP	UP	FALSE	FALSE	uncharacterized protein LOC111030313
Cluster-26641.6673	2.0925	1.4775	0.885	2.035	2.3125	FALSE	FALSE	DOWN	FALSE	head-specific guanylate cyclase
Cluster-26641.6675	106.565	18.585	25.7075	19.81	12.765	UP	FALSE	FALSE	FALSE	ABC transporter G family member 7-like
Cluster-26641.6677	1.13	0.475	0.2475	0.235	0.2875	UP	FALSE	FALSE	FALSE	molybdenum cofactor sulfurase 3
Cluster-26641.668	0.8825	2.135	2.275	1.6075	2.325	DOWN	FALSE	FALSE	FALSE	glycine-rich RNA-binding protein 2-like
Cluster-26641.6709	0.905	1.07	3.0725	3.7525	2.265	FALSE	DOWN	FALSE	FALSE	doublesex- and mab-3-related transcription factor A2-like
Cluster-26641.671	4.3475	9.1675	12.055	11.095	10.305	DOWN	FALSE	FALSE	FALSE	ATP-dependent DNA helicase PIF1
Cluster-26641.6719	1.13	1.1725	4.345	5.5175	7.1025	FALSE	DOWN	FALSE	FALSE	uncharacterized peptidase C1-like protein F26E4.3
Cluster-26641.6722	1.84	3.64	3.2375	2.9175	2.2975	DOWN	FALSE	FALSE	FALSE	ATP synthase subunit a, chloroplastic
Cluster-26641.673	0.525	0.3325	0.275	0.7625	0.7875	FALSE	FALSE	DOWN	FALSE	histone-lysine N-methyltransferase eggless
Cluster-26641.6752	8.7825	3.3225	3.475	6.05	3.1675	UP	FALSE	FALSE	FALSE	uncharacterized protein LOC111037878
Cluster-26641.6756	42.5825	16.0575	16.6975	22.4825	19.0975	UP	FALSE	FALSE	FALSE	aromatic-L-amino-acid decarboxylase
Cluster-26641.676	1.3875	2.8525	2.475	2.9075	2.7925	DOWN	FALSE	FALSE	FALSE	uncharacterized protein LOC100568563
Cluster-26641.6776	2.955	1.76	3.835	6.02	7.305	FALSE	DOWN	FALSE	FALSE	homeobox protein prophet of Pit-1-like
Cluster-26641.6812	3.9225	1.61	0.585	0.5325	0.5525	UP	FALSE	FALSE	FALSE	ribosome biogenesis protein TSR3 homolog isoform X1
Cluster-26641.6833	54.135	83.8225	142.778	85.4875	35.57	FALSE	FALSE	FALSE	UP	soluble calcium-activated nucleotidase 1-like isoform X2
Cluster-26641.6854	2.7425	1.24	1.41	2.3575	2.235	UP	FALSE	FALSE	FALSE	adenylate kinase isoenzyme 5
Cluster-26641.6870	0.085	0.9925	2.495	0.2325	9.4475	DOWN	FALSE	FALSE	FALSE	adult cuticle protein 1-like
Cluster-26641.6882	9.24	5.97	3.4925	8.1075	10.0175	FALSE	FALSE	DOWN	FALSE	uncharacterized protein LOC111031811
Cluster-26641.6890	5.5	10.875	10.61	10.0675	9.6175	DOWN	FALSE	FALSE	FALSE	DNA polymerase alpha catalytic subunit
Cluster-26641.6928	3.4175	7.0275	14.66	16.1925	15.5	DOWN	DOWN	FALSE	FALSE	fork head domain-containing protein FD4-like isoform X1
Cluster-26641.6946	4.1625	3.0175	6.8675	6.295	7.615	FALSE	DOWN	FALSE	FALSE	transcription factor AP-2-epsilon isoform X1
Cluster-26641.6949	7.9675	4.4675	5.175	5.2875	2.48	FALSE	FALSE	FALSE	UP	uncharacterized protein LOC111043026
Cluster-26641.7016	0.865	2.96	4.2075	4.95	3.5575	DOWN	FALSE	FALSE	FALSE	glyoxylate reductase..hydroxypyruvate reductase-like
Cluster-26641.7045	2.27	0.9975	1.65	1.8325	2.4875	UP	FALSE	FALSE	FALSE	hepatocyte nuclear factor 6-like isoform X3
Cluster-26641.7053	5.2275	11.725	13.755	12.9125	12.5775	DOWN	FALSE	FALSE	FALSE	lymphokine-activated killer T-cell-originated protein kinase
Cluster-26641.7059	22.66	45.1225	0.5625	24.0725	4.995	FALSE	FALSE	DOWN	FALSE	RNA-dependent RNA polymerase domain containing protein
Cluster-26641.7061	6.105	5.6675	2.6125	3.305	4.0725	FALSE	UP	FALSE	FALSE	ATP-dependent DNA helicase pif1-like
Cluster-26641.7076	6.4175	21.1675	16.41	14.47	13.565	DOWN	FALSE	FALSE	FALSE	uncharacterized protein LOC103309027
Cluster-26641.7098	1.9125	3.5875	7.96	8.3975	8.61	FALSE	DOWN	FALSE	FALSE	homeobox protein B-H1-like
Cluster-26641.7106	56.105	34.5625	10.8275	29.0625	23.7175	FALSE	UP	DOWN	FALSE	cuticle protein 19-like
Cluster-26641.7128	23.965	9.785	5.81	14.395	6.9925	UP	FALSE	FALSE	UP	inactive pancreatic lipase-related protein 1-like
Cluster-26641.7130	7.675	5.3425	4.1025	8.88	9.7425	FALSE	FALSE	DOWN	FALSE	putative mediator of RNA polymerase II transcription subunit 26
Cluster-26641.7173	57.9925	35.6925	10.14	5.2325	12.225	FALSE	UP	UP	DOWN	legumain-like
Cluster-26641.7182	3.18	1.78	4.26	2.82	2.15	FALSE	DOWN	FALSE	FALSE	uncharacterized protein LOC100168310
Cluster-26641.7195	1.245	0.4525	0.605	1.6725	1.97	UP	FALSE	DOWN	FALSE	glycoprotein 3-alpha-L-fucosyltransferase A-like
Cluster-26641.7204	0.695	0.385	4.02	11.26	9.955	FALSE	DOWN	DOWN	FALSE	proton-coupled amino acid transporter-like protein pathetic isoform X2
Cluster-26641.721	3.55	1.265	3.5275	5.315	6.4725	UP	DOWN	FALSE	FALSE	uncharacterized protein LOC111037741
Cluster-26641.7212	12.6225	25.7175	32.1225	28.5675	26.07	DOWN	FALSE	FALSE	FALSE	serine..threonine-protein kinase polo isoform X2
Cluster-26641.7269	17.7975	8.415	5.5175	12.94	7.6525	UP	FALSE	DOWN	FALSE	pancreatic triacylglycerol lipase-like
Cluster-26641.7283	5.8725	2.3	1.27	2.63	3.055	UP	FALSE	FALSE	FALSE	acetyl-coenzyme A transporter 1
Cluster-26641.7304	39.1125	14.46	7.3775	17.9675	14.2025	UP	FALSE	DOWN	FALSE	cytochrome P450 6DD1
Cluster-26641.7307	4.785	7.3675	11.855	2.68	3.675	FALSE	FALSE	UP	FALSE	fatty acid synthase-like
Cluster-26641.731	14.4675	11.8675	4.9925	5.6975	8.1	FALSE	UP	FALSE	FALSE	eclosion hormone-like
Cluster-26641.7319	66.0725	31.365	36.315	34.0325	17.5625	FALSE	FALSE	FALSE	UP	short-chain dehydrogenase..reductase family 16C member 6-like isoform X1
Cluster-26641.7335	19.695	11.8625	4.8975	6.805	9.77	FALSE	UP	FALSE	FALSE	bifunctional lycopene cyclase..phytoene synthase
Cluster-26641.7380	0.145	0.185	0.8175	1.12	0.42	FALSE	DOWN	FALSE	FALSE	putative uncharacterized protein FLJ37770
Cluster-26641.7413	0.6225	0.995	2.4625	2.5875	3.6425	FALSE	DOWN	FALSE	FALSE	insulin-like growth factor-binding protein-related protein 1
Cluster-26641.7414	14.7075	4.8925	2.335	7.84	2.9175	UP	FALSE	FALSE	UP	clavesin-2
Cluster-26641.7417	0.8175	0.2825	0.4475	1.2	1.4575	UP	FALSE	FALSE	FALSE	uncharacterized protein LOC111031186
Cluster-26641.7423	0.69	0.925	0.92	0.4	0.6175	FALSE	FALSE	UP	FALSE	fumarate hydratase, mitochondrial isoform X3
Cluster-26641.7428	102.215	82.0575	80.465	138.49	13.4525	FALSE	FALSE	FALSE	UP	cuticle protein 21-like
Cluster-26641.7443	15.9525	7.2425	5.1775	7.89	6.935	UP	FALSE	FALSE	FALSE	ABC transporter G family member 23-like
Cluster-26641.7445	55.0575	25.2075	35.225	30.17	26.24	UP	FALSE	FALSE	FALSE	long-chain fatty acid transport protein 4
Cluster-26641.7446	49.0125	22.5125	35.2775	29.26	25.5075	UP	FALSE	FALSE	FALSE	long-chain fatty acid transport protein 4
Cluster-26641.7478	29.5725	18.6275	30.2025	44.3825	15.145	FALSE	FALSE	FALSE	UP	protein-glutamate O-methyltransferase-like
Cluster-26641.7479	8.2775	5.865	8.2075	12.7325	3.6525	FALSE	FALSE	FALSE	UP	protein-glutamate O-methyltransferase
Cluster-26641.7524	32.7475	95.1825	102.303	16.2075	20.155	FALSE	FALSE	UP	FALSE	annexin B11-like
Cluster-26641.7525	38.1375	110.005	118.853	21.7675	25.21	FALSE	FALSE	UP	FALSE	annexin B11-like
Cluster-26641.7526	3.32	8.8125	10.08	9.725	9.5725	DOWN	FALSE	FALSE	FALSE	chromosome-associated kinesin KIF4
Cluster-26641.7529	5.12	9.915	12.2825	11.1025	11.3675	DOWN	FALSE	FALSE	FALSE	uncharacterized protein PF11_0213-like isoform X2
Cluster-26641.7576	0.0475	0.0675	0.2	0.6375	0.68	FALSE	FALSE	DOWN	FALSE	uncharacterized protein LOC111040403
Cluster-26641.7594	20.47	5.6725	3.0525	8.0475	6.8975	UP	FALSE	DOWN	FALSE	scavenger receptor class B member 1-like isoform X2
Cluster-26641.7597	2.165	5.1225	5.945	7.045	6.94	DOWN	FALSE	FALSE	FALSE	THAP domain-containing protein 8-like
Cluster-26641.7634	0.3075	0.9225	0.8975	0.725	0.7625	DOWN	FALSE	FALSE	FALSE	uncharacterized protein LOC111039157
Cluster-26641.7638	15.51	7.5375	3.8225	16.9225	12.255	FALSE	FALSE	DOWN	FALSE	cytochrome P450 18A1
Cluster-26641.7639	35.4325	17.4975	11.19	45.63	30.3225	FALSE	FALSE	DOWN	FALSE	cytochrome P450 18a1-like
Cluster-26641.7671	4.755	0.47	0.2	0.7725	0.035	UP	FALSE	FALSE	FALSE	ACYPI009552
Cluster-26641.7675	7.3275	7.775	12.265	13.365	4.055	FALSE	FALSE	FALSE	UP	nose resistant to fluoxetine protein 6
Cluster-26641.7734	29.31	12.0675	6.49	14.34	11.0675	UP	FALSE	FALSE	FALSE	elongation of very long chain fatty acids protein AAEL008004
Cluster-26641.7746	4.73	8.0225	3.4925	2.6075	2.665	FALSE	UP	FALSE	FALSE	UDP-glucuronosyl transferase 345A2
Cluster-26641.7784	270.1	286.892	126.433	108.275	117.1	FALSE	UP	FALSE	FALSE	fatty acid synthase
Cluster-26641.7793	0.5575	1.9375	1.7975	1.6875	1.6525	DOWN	FALSE	FALSE	FALSE	uncharacterized protein LOC103310243
Cluster-26641.7829	2.635	5.6975	5.895	3.5825	3.3325	DOWN	FALSE	FALSE	FALSE	growth..differentiation factor 8-like isoform X1
Cluster-26641.7861	1.0175	0.5775	0.245	0.2775	0.34	FALSE	UP	FALSE	FALSE	LOW QUALITY PROTEIN: eukaryotic translation initiation factor 4 gamma 3-like
Cluster-26641.7876	7.6575	1.735	4.82	6.55	6.945	UP	DOWN	FALSE	FALSE	ACYPI001606
Cluster-26641.7892	5.04	1.98	1.1725	4.1	2.0625	UP	FALSE	DOWN	UP	plasminogen activator inhibitor 2 type A-like isoform X2
Cluster-26641.7908	6.71	6.3525	7.455	3.825	3.1725	FALSE	FALSE	UP	FALSE	hypothetical protein OCBIM_22005852mg
Cluster-26641.7936	3.4675	1.525	0.8	0.825	1.1375	UP	FALSE	FALSE	FALSE	protein ANTAGONIST OF LIKE HETEROCHROMATIN PROTEIN 1-like
Cluster-26641.8013	76.085	54.4575	29.5575	68.135	26.6125	FALSE	FALSE	DOWN	UP	leucine-rich repeat extensin-like protein 1
Cluster-26641.802	0.225	0.925	2.985	3.455	3.63	DOWN	DOWN	FALSE	FALSE	cytochrome P450 307A1
Cluster-26641.8036	6.7	5.235	2.4375	3.8375	3.395	FALSE	UP	FALSE	FALSE	thiamine transporter 1-like, partial
Cluster-26641.8043	4.0975	0.15	0.5575	1.0725	0.3575	UP	FALSE	FALSE	FALSE	ACYPI001342
Cluster-26641.8053	80.265	22.4625	27.68	35.61	15.7875	UP	FALSE	FALSE	UP	hornerin-like
Cluster-26641.8055	0.5925	0.5825	0.2675	0.4325	0.5575	FALSE	UP	FALSE	FALSE	uncharacterized protein LOC100570038 isoform X1
Cluster-26641.8059	5.21	1.7475	1.13	3.085	3.9325	UP	FALSE	DOWN	FALSE	dual specificity phosphatase 21
Cluster-26641.8066	1.0875	2.4425	5.3125	7.03	6.5375	DOWN	DOWN	FALSE	FALSE	zinc finger protein 235 isoform X1
Cluster-26641.8068	26.385	12.3675	9.785	17.175	14.22	UP	FALSE	FALSE	FALSE	peroxidase
Cluster-26641.8078	13.4975	6.5375	3.355	8.02	5.5275	FALSE	FALSE	DOWN	FALSE	uncharacterized protein LOC107164001 isoform X2
Cluster-26641.8094	2.49	18.2725	17.5375	16.6	14.465	DOWN	FALSE	FALSE	FALSE	helix-loop-helix protein 2 isoform X1
Cluster-26641.8114	2.37	1.36	0.765	1.875	2.4125	FALSE	FALSE	DOWN	FALSE	ras-related protein Rap-2b-like
Cluster-26641.8118	14.3575	6.22	8.425	10.9225	10.98	UP	FALSE	FALSE	FALSE	alpha-protein kinase 1
Cluster-26641.8134	13.1925	1.1525	0.78	2.4875	0.09	FALSE	FALSE	FALSE	UP	ACYPI008325
Cluster-26641.8135	12.455	4.25	3.62	6.61	4.865	UP	FALSE	FALSE	FALSE	uncharacterized protein LOC111039552
Cluster-26641.8158	32.965	10.005	5.415	27.015	8.1025	UP	FALSE	FALSE	UP	circadian clock-controlled protein-like, partial
Cluster-26641.8162	22.5	32.0025	13.91	13.415	18.19	FALSE	UP	FALSE	FALSE	flocculation protein FLO11 isoform X3
Cluster-26641.8170	1.7475	5.945	13.335	7.05	6.09	DOWN	DOWN	UP	FALSE	venom protease-like isoform X1
Cluster-26641.8183	5.695	3.9175	1.7225	2.92	3.085	FALSE	UP	FALSE	FALSE	phospholipase A1-like isoform X1
Cluster-26641.8222	207.887	144.412	86.5	343.363	22.69	FALSE	FALSE	FALSE	UP	larval cuticle protein A3A
Cluster-26641.8247	24.6625	30.5775	38.4475	31.2025	15.86	FALSE	FALSE	FALSE	UP	delta-1-pyrroline-5-carboxylate synthase
Cluster-26641.8269	21.215	10.225	10.345	8.7975	9.7325	UP	FALSE	FALSE	FALSE	acyl-CoA-binding protein homolog
Cluster-26641.8283	13.9175	5.0425	3.3375	8.4375	8.5975	UP	FALSE	DOWN	FALSE	putative fatty acyl-CoA reductase CG5065
Cluster-26641.8342	0.3225	0.0675	0.07	0.1125	0.0925	UP	FALSE	FALSE	FALSE	dynein heavy chain 6, axonemal-like
Cluster-26641.8363	23.5425	8.775	6.515	11.145	8.6925	UP	FALSE	FALSE	FALSE	uncharacterized protein LOC111032394 isoform X2
Cluster-26641.8390	9.1825	4.6375	3.7025	9.5575	9.2425	FALSE	FALSE	DOWN	FALSE	trypsin-1-like
Cluster-26641.8405	6.405	14.62	14.3475	13.2675	12.5275	DOWN	FALSE	FALSE	FALSE	merozoite surface antigen 2-like
Cluster-26641.8417	2.725	2.5325	1.06	1.3625	1.23	FALSE	UP	FALSE	FALSE	uncharacterized protein LOC111029107 isoform X1
Cluster-26641.8425	4.3275	12.29	19.03	16.1325	16.1525	DOWN	FALSE	FALSE	FALSE	MOXD1 homolog 1-like
Cluster-26641.8426	67.4975	40.4875	147.537	117.363	81.43	FALSE	DOWN	FALSE	FALSE	hypothetical protein
Cluster-26641.8521	80.0725	55.085	35.6325	76.26	56.89	FALSE	FALSE	DOWN	FALSE	uncharacterized protein LOC111034821
Cluster-26641.8544	0.065	1.075	3.58	7.5175	6.9275	DOWN	DOWN	FALSE	FALSE	uncharacterized protein LOC107882289
Cluster-26641.8546	80.81	106.928	95.2725	36.0175	40.925	FALSE	FALSE	UP	FALSE	uncharacterized protein LOC100166015 isoform X1
Cluster-26641.8548	1.335	4.1225	3.8025	1.5975	1.31	DOWN	FALSE	UP	FALSE	RNA-directed DNA polymerase from mobile element jockey-like
Cluster-26641.8555	10.3	8.0825	9.425	4.935	4.965	FALSE	FALSE	UP	FALSE	acyl-CoA desaturase isoform X1
Cluster-26641.8600	1.41	6.17	10.0625	10.595	9.8475	DOWN	FALSE	FALSE	FALSE	segmentation polarity homeobox protein engrailed-like
Cluster-26641.8605	10.1675	5.495	3.6025	1.935	4.0125	FALSE	FALSE	UP	FALSE	elongation of very long chain fatty acids protein 4-like
Cluster-26641.8607	2.6925	2.0375	0.98	2	2.55	FALSE	UP	FALSE	FALSE	zwei Ig domain protein zig-8-like
Cluster-26641.8611	13.4225	31.53	39.3925	35.4375	34.9975	DOWN	FALSE	FALSE	FALSE	uncharacterized protein LOC100572761 isoform X2
Cluster-26641.8635	55.955	26.39	14.05	34.8675	18.605	UP	FALSE	DOWN	FALSE	glycine, alanine and asparagine-rich protein-like isoform X3
Cluster-26641.8636	1.1675	0.5375	0.6075	0.945	0.9575	UP	FALSE	FALSE	FALSE	serine protease nudel
Cluster-26641.8660	13.6125	27.715	38.3575	31.595	29.125	DOWN	FALSE	FALSE	FALSE	uncharacterized protein LOC111037024
Cluster-26641.8666	2.8325	1.1425	0.2875	0.4825	0.515	UP	UP	FALSE	FALSE	dynein light chain 4, axonemal isoform X2
Cluster-26641.8737	0.7575	0.31	0.2825	1.19	1.1025	FALSE	FALSE	DOWN	FALSE	LOW QUALITY PROTEIN: neprilysin-2-like
Cluster-26641.8751	4.9925	12.82	15.5025	13.9475	13.7225	DOWN	FALSE	FALSE	FALSE	kinesin-like protein KIF11
Cluster-26641.8786	18.8025	19.96	34.5675	17.1025	16.75	FALSE	FALSE	UP	FALSE	uncharacterized protein LOC111031217
Cluster-26641.8795	7.37	0.9725	2.735	1.9975	0.965	UP	FALSE	FALSE	FALSE	cuticular protein 72 precursor
Cluster-26641.8835	20.1675	2.8475	2.205	4.505	1.285	FALSE	FALSE	FALSE	UP	ACYPI000784
Cluster-26641.8862	6.5825	2.4975	3.4425	3.51	3.51	UP	FALSE	FALSE	FALSE	uncharacterized protein LOC107163673
Cluster-26641.8882	2.8	1.445	1.0575	2.4275	3.19	FALSE	FALSE	DOWN	FALSE	fatty acyl-CoA reductase 1-like
Cluster-26641.8890	25.7125	29.28	24.02	25.45	13.1375	FALSE	FALSE	FALSE	UP	soluble trehalase
Cluster-26641.8910	7.315	6.4475	13.9875	10.63	11.335	FALSE	DOWN	FALSE	FALSE	DNA-binding protein inhibitor ID-1
Cluster-26641.8915	6.1125	2.35	0.825	1.6725	1.9525	UP	UP	FALSE	FALSE	uncharacterized protein LOC111040603
Cluster-26641.8959	0.0525	0.105	0.1175	0.7825	0.015	FALSE	FALSE	FALSE	UP	LOW QUALITY PROTEIN: uncharacterized protein LOC111619459
Cluster-26641.8966	128.913	47.515	24.3375	92.765	29.11	UP	FALSE	FALSE	UP	keratin, type I cytoskeletal 9-like
Cluster-26641.8971	42.1175	14.3525	8.845	25.385	17.4875	UP	FALSE	FALSE	FALSE	proline and serine-rich protein 1-like
Cluster-26641.8973	13.67	27.92	23.595	23.9725	21.95	DOWN	FALSE	FALSE	FALSE	uncharacterized protein LOC111026347
Cluster-26641.9004	3.1025	1.4325	1.1375	1.9825	2.2075	UP	FALSE	FALSE	FALSE	cationic amino acid transporter 2
Cluster-26641.9089	0.72	1.91	1.5325	1.9225	1.985	DOWN	FALSE	FALSE	FALSE	40S ribosomal protein S11
Cluster-26641.9107	7.6725	33.465	39.735	39.0175	36.99	DOWN	FALSE	FALSE	FALSE	enhancer of split mbeta protein-like
Cluster-26641.9109	30.3375	31.78	45.635	62.805	17.2775	FALSE	FALSE	FALSE	UP	pupal cuticle protein 27-like
Cluster-26641.9138	0.7375	0.52	0.32	0.175	0.8275	FALSE	FALSE	FALSE	DOWN	uncharacterized protein LOC111030543 isoform X2
Cluster-26641.9144	53.68	88.9675	35.7725	24.725	26.94	FALSE	UP	FALSE	FALSE	fatty acid synthase-like, partial
Cluster-26641.9154	0.91	1.3725	2.76	3.095	2.91	FALSE	DOWN	FALSE	FALSE	hypothetical protein OCBIM_22006205mg
Cluster-26641.9159	7.8975	6.99	11.675	14.08	7.07	FALSE	FALSE	FALSE	UP	uncharacterized protein LOC111029452 isoform X2
Cluster-26641.9207	1.7175	1.3475	0.39	0.445	0.8525	FALSE	UP	FALSE	FALSE	zinc finger MYM-type protein 1-like isoform X1
Cluster-26641.9213	16.6975	13.3925	9.0775	20.6775	19.775	FALSE	FALSE	DOWN	FALSE	uncharacterized protein LOC100569007
Cluster-26641.9215	5.3525	2.095	2.305	2.0575	1.6225	UP	FALSE	FALSE	FALSE	ACYPI003503
Cluster-26641.9219	1.395	0.47	0.34	1.3575	1.3075	FALSE	FALSE	DOWN	FALSE	uncharacterized protein LOC111035092
Cluster-26641.9247	145.197	64.2275	80.7925	173.808	23.7125	UP	FALSE	FALSE	UP	endocuticle structural glycoprotein SgAbd-4-like
Cluster-26641.9250	30.6325	48.37	34.755	18.68	14.3475	FALSE	FALSE	UP	FALSE	asparagine synthetase
Cluster-26641.9279	1.465	0.3375	0.1525	0.1825	0.2075	UP	FALSE	FALSE	FALSE	uncharacterized protein LOC107165338
Cluster-26641.9304	13.44	6.3375	4.23	8.185	6.045	UP	FALSE	FALSE	FALSE	protein pygopus
Cluster-26641.9305	2.21	0.9675	0.6725	1.0025	0.8875	UP	FALSE	FALSE	FALSE	uncharacterized protein LOC107173443
Cluster-26641.9319	3.33	2.1675	1.485	3.2325	3.7275	FALSE	FALSE	DOWN	FALSE	hemicentin-2-like
Cluster-26641.9344	4.415	2.965	1.5025	3.9925	4.81	FALSE	FALSE	DOWN	FALSE	uncharacterized protein LOC111039809, partial
Cluster-26641.9349	14.885	13.3	21.3625	11.1325	9.0375	FALSE	FALSE	UP	FALSE	uncharacterized protein LOC111033912
Cluster-26641.9372	1.28	0.84	0.135	0.6975	0.71	FALSE	FALSE	DOWN	FALSE	alpha-tocopherol transfer protein-like
Cluster-26641.9388	0.9425	1.9575	0.46	2.365	20.1325	FALSE	FALSE	DOWN	DOWN	uncharacterized protein LOC111029012 isoform X2
Cluster-26641.9390	0.7825	1.5775	1.665	0.9625	1.2525	DOWN	FALSE	FALSE	FALSE	tyrosine--tRNA ligase-like
Cluster-26641.9402	3.6825	1.69	1.2525	2.515	2.855	UP	FALSE	FALSE	FALSE	nicotinic acetylcholine receptor alpha 7-1 subunit
Cluster-26641.9417	11.375	5.8125	3.615	9.86	2.75	FALSE	FALSE	FALSE	UP	uncharacterized protein LOC111026632
Cluster-26641.9420	2.585	1.1475	0.6825	1.2325	1.795	UP	FALSE	FALSE	FALSE	gamma-aminobutyric acid receptor subunit beta-like isoform X1
Cluster-26641.9426	0.85	0.3475	0.2675	0.445	0.4075	UP	FALSE	FALSE	FALSE	kelch-like protein 17 isoform X2
Cluster-26641.9443	98.4275	75.065	35.49	18.7225	50.135	FALSE	UP	UP	DOWN	hsp70-1
Cluster-26641.9444	133.827	102.275	50.2625	30.0075	89.9475	FALSE	FALSE	FALSE	DOWN	heat shock protein 70-2
Cluster-26641.9479	0.32	0.2775	0.305	0.9175	0.8775	FALSE	FALSE	DOWN	FALSE	uncharacterized protein LOC111038580
Cluster-26641.9486	4.5675	14.38	16.32	16.39	16.14	DOWN	FALSE	FALSE	FALSE	enhancer of split mgamma protein
Cluster-26641.9491	4.5075	3.0175	1.29	1.16	1.97	FALSE	UP	FALSE	FALSE	probable phospholipid-transporting ATPase IA isoform X1
Cluster-26641.9524	28.9625	27.82	12.18	32.5175	5.2325	FALSE	FALSE	FALSE	UP	extensin-like
Cluster-26641.9602	9.5425	13.0875	14.58	4.3575	3.2175	FALSE	FALSE	UP	FALSE	uncharacterized protein LOC100570052
Cluster-26641.9668	4.035	8.77	10.0775	9.575	10.19	DOWN	FALSE	FALSE	FALSE	ras GTPase-activating-like protein IQGAP1 isoform X1
Cluster-26641.9713	5.415	3.0725	4.27	2.0725	2.7775	FALSE	FALSE	UP	FALSE	fatty acyl-CoA reductase wat-like
Cluster-26641.9727	10.2725	7.7175	3.13	2.925	3.4	FALSE	UP	FALSE	FALSE	multidrug resistance-associated protein 4-like isoform X2
Cluster-26641.9729	25.6125	21.0175	9.735	8.7625	11.0775	FALSE	UP	FALSE	FALSE	multidrug resistance-associated protein 4 isoform X2
Cluster-26641.9730	2.5775	1.94	0.85	0.8175	1.4025	FALSE	UP	FALSE	FALSE	probable multidrug resistance-associated protein lethal..2..03659
Cluster-26641.9731	1.285	1.2825	1.0125	0.3775	0.5175	FALSE	FALSE	UP	FALSE	probable multidrug resistance-associated protein lethal..2..03659
Cluster-26641.9732	2.685	3.335	2.6525	1.3425	1.5575	FALSE	FALSE	UP	FALSE	probable multidrug resistance-associated protein lethal..2..03659
Cluster-26641.9760	10.6575	9.5375	6.5425	9.17	3.28	FALSE	FALSE	FALSE	UP	general transcriptional corepressor trfA-like
Cluster-26641.9763	0.7225	0.42	0.4325	1.59	1.215	FALSE	FALSE	DOWN	FALSE	myrosinase 1 isoform X1
Cluster-26641.9769	6.4725	2.5625	1.6175	3.28	2.825	UP	FALSE	FALSE	FALSE	glucose dehydrogenase
Cluster-26641.9783	2.3625	0.575	1.47	2.2425	2.735	UP	FALSE	FALSE	FALSE	uncharacterized protein LOC111026367
Cluster-26641.9804	1.5625	5.1975	5.5025	6.4625	6.2525	DOWN	FALSE	FALSE	FALSE	homeobox protein Nkx-6.1-like
Cluster-26641.9810	13.7175	6.0575	6.7825	6.89	5.66	UP	FALSE	FALSE	FALSE	putative uncharacterized protein DDB_G0271606
Cluster-26641.9812	347.93	153.767	121.185	242.013	92.9925	UP	FALSE	FALSE	UP	cuticular protein CPG12-like isoform X1
Cluster-26641.9840	1.8425	0.565	15.985	0.475	1.81	FALSE	DOWN	UP	FALSE	Actin
Cluster-26641.9858	8.035	13.01	12.585	5.1975	2.99	FALSE	FALSE	UP	FALSE	molting fluid carboxypeptidase A precursor
Cluster-26641.9878	0.285	0.115	0.5275	1.3325	0.65	FALSE	DOWN	FALSE	UP	cytochrome P450 4CJ1
Cluster-26641.9880	21.7375	17.3875	23.3725	6.49	6.455	FALSE	FALSE	UP	FALSE	mucin-2-like
Cluster-26641.9886	1.3875	3.845	2.13	3.26	2.7525	DOWN	FALSE	FALSE	FALSE	peptidyl-prolyl cis-trans isomerase-like
Cluster-26641.9908	51.9225	19.655	18.4275	24.83	19.38	UP	FALSE	FALSE	FALSE	uncharacterized protein LOC107173969
Cluster-26641.9912	8.2825	2.29	1.5025	1.58	3.5925	UP	FALSE	FALSE	DOWN	ACYPI008534
Cluster-26641.9931	11.08	9.7275	8.4825	4.1275	4.1425	FALSE	FALSE	UP	FALSE	uncharacterized protein LOC111029078 isoform X1
Cluster-26641.9952	35.375	74.225	83.46	88.125	82.67	DOWN	FALSE	FALSE	FALSE	DNA topoisomerase 2
Cluster-26789.0	0.1225	0.8725	8.5	1.9775	0.0175	FALSE	FALSE	FALSE	UP	chromosomal protein D1-like
Cluster-2730.0	44.015	59.095	64.7725	28.7775	31.0675	FALSE	FALSE	UP	FALSE	chorion peroxidase
Cluster-27390.0	0.3025	0.185	0.0525	0.2425	0.3925	FALSE	FALSE	DOWN	FALSE	uncharacterized protein LOC107883264
Cluster-27479.0	0.0475	0.42	0	0.025	0.235	FALSE	UP	FALSE	FALSE	hypothetical protein WR25_25658
Cluster-27661.0	0.4175	0.095	0.2225	0.23	0.3525	UP	FALSE	FALSE	FALSE	uncharacterized protein LOC100574449
Cluster-27784.0	1.35	0.5	0.435	0.64	0.65	UP	FALSE	FALSE	FALSE	inversin
Cluster-27928.0	1.9775	0.8525	1.47	1.46	1.14	UP	FALSE	FALSE	FALSE	venom serine protease
Cluster-27990.0	0.0975	0.33	0	0.2925	0.1575	FALSE	UP	FALSE	FALSE	ahcY
Cluster-28071.0	3.005	1.2325	1.5475	2.0075	2.7675	UP	FALSE	FALSE	FALSE	uncharacterized protein LOC111028051
Cluster-28085.0	1.7725	0.51	0.435	1.4175	1.265	UP	FALSE	DOWN	FALSE	uncharacterized protein LOC111029509
Cluster-28156.0	0.0075	0.1225	3.9725	0.2325	0	FALSE	FALSE	FALSE	UP	ubiquitin conjugation factor E4 B
Cluster-28256.0	0.5775	0.7675	1.57	1.4925	1.7975	FALSE	DOWN	FALSE	FALSE	delta..24..-sterol reductase-like isoform X3
Cluster-28352.0	0.2825	0.195	0	0.6125	0.2175	FALSE	FALSE	DOWN	FALSE	hypothetical protein TTRE_0000975601
Cluster-28513.0	0.1175	0.62	1.03	0.6775	0.305	DOWN	FALSE	FALSE	FALSE	cytochrome b5-related protein-like
Cluster-28648.0	0.5025	0.49	2.655	2.045	1.27	FALSE	DOWN	FALSE	FALSE	uncharacterized protein LOC100162262
Cluster-28693.0	0.0325	0.0775	1.505	0.2375	0.005	FALSE	FALSE	FALSE	UP	uncharacterized protein LOC105226814 isoform X1
Cluster-28749.0	21.165	32.89	0.28	19.63	2.52	FALSE	FALSE	DOWN	FALSE	lysozyme B-like
Cluster-28842.0	0.2125	0.07	0.5375	0.0675	0.7375	FALSE	DOWN	FALSE	FALSE	phosphate carrier protein, mitochondrial
Cluster-28966.0	0.62	0.4925	0.1425	0.13	0.2375	FALSE	UP	FALSE	FALSE	uncharacterized protein LOC107885030
Cluster-29202.0	0.33	0.3725	0.7825	0.99	1.1025	FALSE	DOWN	FALSE	FALSE	ionotropic receptor 25a
Cluster-29397.0	0.9525	0.2175	0.445	0.4775	0.5575	UP	FALSE	FALSE	FALSE	IgA FC receptor
Cluster-29463.0	1.2775	0.2125	0.655	0.5675	0.485	UP	FALSE	FALSE	FALSE	uncharacterized protein LOC111035306
Cluster-29668.1	0.9875	0.3925	0.2625	1.765	1.4675	UP	FALSE	DOWN	FALSE	basic phospholipase A2 pseudexin A chain
Cluster-30006.0	0.8075	0.5425	0.215	0.45	0.395	FALSE	UP	FALSE	FALSE	LOW QUALITY PROTEIN: dynein heavy chain 3, axonemal-like
Cluster-30046.0	0.66	0.215	0.9525	1.0825	1.135	FALSE	DOWN	FALSE	FALSE	transmembrane protein 17B-like
Cluster-30105.0	0.04	0.595	5.8125	1.0375	0.04	FALSE	FALSE	FALSE	UP	activator of 90 kDa heat shock protein ATPase homolog 1
Cluster-30318.0	2.2825	1.2475	1.6925	7.18	2.0275	FALSE	FALSE	DOWN	UP	androgen-induced gene 1 protein-like
Cluster-30400.0	0.81	0.2525	0.2475	0.445	0.37	UP	FALSE	FALSE	FALSE	reticulocyte-binding protein 2 homolog a isoform X1
Cluster-30522.0	0.2575	0.3475	0.3375	0.3825	1.9475	FALSE	FALSE	FALSE	DOWN	Mitochondrial chaperonin hsp60
Cluster-30591.0	2.1575	0.6225	1.1375	1.5675	1.78	UP	FALSE	FALSE	FALSE	probable palmitoyltransferase ZDHHC24 isoform X1
Cluster-30819.0	1.1325	0.805	0.4525	1.17	1.1375	FALSE	FALSE	DOWN	FALSE	uncharacterized protein LOC111042743
Cluster-31079.0	0.04	0.235	2.395	0.33	0.0025	FALSE	FALSE	FALSE	UP	serrate RNA effector molecule homolog isoform X1
Cluster-31155.0	3.2975	2.7125	2.2625	0.6875	0.5875	FALSE	FALSE	UP	FALSE	flocculation protein FLO11-like
Cluster-31205.0	2.9575	1.3675	1.225	2.23	2.3575	UP	FALSE	FALSE	FALSE	uncharacterized protein LOC111040289
Cluster-31247.0	2.1875	0.8775	0.4575	0.505	0.91	UP	FALSE	FALSE	FALSE	CUGBP Elav-like family member 3-B
Cluster-31412.0	1.1125	0.5025	0.3775	0.69	0.69	UP	FALSE	FALSE	FALSE	probable G-protein coupled receptor CG31760
Cluster-31428.0	1.82	0.6375	1.1125	0.2725	1.21	FALSE	FALSE	FALSE	DOWN	protein takeout-like
Cluster-31680.0	0.1675	1.265	0.5475	0.7225	1.6225	DOWN	FALSE	FALSE	FALSE	heat shock cognate 90 kDa protein-like
Cluster-31937.0	0.1225	0.1	0.2	0.015	0.08	FALSE	FALSE	UP	FALSE	pectinesterase-like
Cluster-31942.0	5.9625	2.635	2.8075	3.5575	3.78	UP	FALSE	FALSE	FALSE	uncharacterized protein LOC111033981
Cluster-32115.1	0.5825	1.7325	2.1775	0.23	0.365	DOWN	FALSE	UP	FALSE	uncharacterized protein LOC111039782
Cluster-32163.0	1.1675	0.875	0.1525	0.505	0.42	FALSE	UP	FALSE	FALSE	uncharacterized protein LOC100570753
Cluster-32397.0	38.89	27.62	0.4425	31.09	4.35	FALSE	FALSE	DOWN	FALSE	protein NPC2 homolog
Cluster-32480.0	0	0.01	2.1675	0.02	0.0075	FALSE	DOWN	FALSE	FALSE	protein shuttle craft
Cluster-32902.0	0.3425	0.0825	0.205	0.3825	0.585	UP	FALSE	FALSE	FALSE	coiled-coil domain-containing protein 39-like isoform X1
Cluster-32951.0	1.26	0.44	0.63	1.1	1.14	UP	FALSE	FALSE	FALSE	X-linked retinitis pigmentosa GTPase regulator-like isoform X2
Cluster-32967.0	0.7125	0.575	0.29	1.285	0.5	FALSE	FALSE	DOWN	UP	anaphase-promoting complex subunit 10-like
Cluster-32986.0	0.4875	0.4175	0.1	0.22	0.3675	FALSE	UP	FALSE	FALSE	uncharacterized protein LOC111027681
Cluster-33401.0	0.8025	0.33	0.4125	0.5425	0.8475	UP	FALSE	FALSE	FALSE	interaptin-like
Cluster-33558.0	0.3	1.695	1.8725	1.8075	1.9125	DOWN	FALSE	FALSE	FALSE	protein odd-skipped-related 2-like
Cluster-33558.1	0.1875	1.895	2.465	2.3625	1.665	DOWN	FALSE	FALSE	FALSE	zinc finger protein 271-like
Cluster-33708.0	0.9375	0.2425	0.3325	0.63	0.795	UP	FALSE	FALSE	FALSE	alpha-..1,6..-fucosyltransferase-like
Cluster-33761.0	0.48	0.4275	3.4075	0.4025	2.645	FALSE	DOWN	FALSE	FALSE	myosin light chain alkali isoform X1
Cluster-34147.0	0	0	0.435	0	3.7975	FALSE	FALSE	FALSE	DOWN	H..ACA ribonucleoprotein complex non-core subunit NAF1-like
Cluster-34168.0	0.4775	0.3325	0.1875	0.42	0.025	FALSE	FALSE	FALSE	UP	uncharacterized protein LOC100572258
Cluster-34231.0	1.2025	0.315	0.4725	0.145	0.8175	UP	FALSE	FALSE	DOWN	hypothetical protein PVIIG_00270, partial
Cluster-34233.0	5.5275	2.2025	1.8375	1.1575	2.875	UP	FALSE	FALSE	FALSE	UDP-glucuronosyltransferase 2C1-like
Cluster-34266.0	0.575	0.4175	1.045	0.6375	0.4675	FALSE	DOWN	FALSE	FALSE	uncharacterized protein PB18E9.04c-like isoform X1
Cluster-34361.1	0.84	0.59	6.2425	0.9475	1.9375	FALSE	DOWN	FALSE	FALSE	troponin T, skeletal muscle isoform X4
Cluster-34363.0	0.095	0.1575	12.125	0.8	0.1125	FALSE	DOWN	FALSE	FALSE	transketolase-like protein 2
Cluster-34463.0	1.0325	0.6725	0.26	0.6775	0.7675	FALSE	UP	DOWN	FALSE	uncharacterized protein LOC100574057 isoform X2
Cluster-34494.0	2.0025	0.71	1.015	1.2075	1.4475	UP	FALSE	FALSE	FALSE	uncharacterized protein LOC100573813
Cluster-34645.0	0.42	0.32	0.0675	0.195	0.17	FALSE	UP	FALSE	FALSE	calcitonin gene-related peptide type 1 receptor-like
Cluster-34754.0	0.6975	0.2325	0.295	0.76	0.64	UP	FALSE	DOWN	FALSE	serine..threonine-protein kinase Nek8 isoform X2
Cluster-34805.0	1.39	1.005	0.5025	1.215	1.4675	FALSE	FALSE	DOWN	FALSE	SCY1-like protein 2 isoform X1
Cluster-34853.0	0.365	0.16	0.2375	0.3975	0.48	UP	FALSE	FALSE	FALSE	dynein heavy chain 10, axonemal-like
Cluster-34872.0	0.085	0.11	0	0.19	0.1825	FALSE	FALSE	DOWN	FALSE	LOW QUALITY PROTEIN: odorant receptor 10a-like
Cluster-34907.0	1.6225	0.6575	0.6925	2.0725	2.06	UP	FALSE	DOWN	FALSE	LOW QUALITY PROTEIN: probable cytochrome P450 6a13
Cluster-35085.2	3.0075	1.9	0.87	2.045	2.2625	FALSE	UP	DOWN	FALSE	EF-hand calcium-binding domain-containing protein 2-like
Cluster-35201.0	2.5275	1.87	2.1725	2.1575	0.86	FALSE	FALSE	FALSE	UP	acetyl-coenzyme A transporter 1-like
Cluster-35244.0	0.015	0.155	1.7675	0.63	0.0175	FALSE	FALSE	FALSE	UP	cell division cycle 7-related protein kinase
Cluster-35425.1	0.75	0.3825	0.24	0.6225	0.6475	FALSE	FALSE	DOWN	FALSE	uncharacterized protein LOC107168011
Cluster-35931.0	0.6925	0.1725	0.29	0.38	0.2675	UP	FALSE	FALSE	FALSE	E3 ubiquitin-protein ligase RNF123-like
Cluster-35946.0	0.405	1.185	3.0875	3.45	3.0675	DOWN	DOWN	FALSE	FALSE	hairy..enhancer-of-split related with YRPW motif protein
Cluster-35999.0	0.36	1.1475	1.225	2.355	7.58	FALSE	FALSE	FALSE	DOWN	uncharacterized protein LOC107169136
Cluster-36295.0	9.3975	2.97	1.9175	1.3125	2.8975	UP	FALSE	FALSE	DOWN	glycine-rich cell wall structural protein-like
Cluster-36678.0	0.0575	0.0275	0.065	0.54	0.795	FALSE	FALSE	DOWN	FALSE	uncharacterized protein LOC100569613
Cluster-36859.0	1.0075	0.33	0.9775	0.9525	1.0775	UP	DOWN	FALSE	FALSE	flocculation protein FLO11
Cluster-36895.0	0.06	0.67	0.415	0.4875	0.47	DOWN	FALSE	FALSE	FALSE	protein atonal homolog 1-like
Cluster-37055.0	2.3875	1.0775	0.3925	0.675	1.1825	UP	FALSE	FALSE	FALSE	uncharacterized protein LOC107882794 isoform X1
Cluster-37064.0	1.4525	0.3025	0.29	0.5075	0.9225	UP	FALSE	FALSE	FALSE	uncharacterized protein LOC111041361
Cluster-37119.0	1.215	0.9775	1.225	0.34	0.895	FALSE	FALSE	UP	FALSE	uncharacterized protein LOC111027582
Cluster-37128.0	1.38	0.3825	0.53	0.9575	0.9925	UP	FALSE	FALSE	FALSE	lisH domain-containing protein ARMC9-like isoform X2
Cluster-37407.0	0.7125	2.0425	3.0375	0.45	0.68	DOWN	FALSE	UP	FALSE	venom serine carboxypeptidase-like
Cluster-37592.0	0.185	0.7475	0.985	0.8775	0.695	DOWN	FALSE	FALSE	FALSE	homeobox protein SIX6-like
Cluster-37707.2	0.875	1.44	0.4975	1.1475	0.96	FALSE	UP	FALSE	FALSE	MFS 1 domain containing protein
Cluster-37707.3	0.455	0.9075	0.5575	0.6725	0.715	DOWN	FALSE	FALSE	FALSE	hypothetical protein NCLIV_068840
Cluster-37721.0	0.72	0.37	0.9925	1.3075	1.2875	FALSE	DOWN	FALSE	FALSE	uncharacterized protein LOC111035649
Cluster-37811.0	0.04	0.4825	5.0125	0.5	0.0175	FALSE	FALSE	FALSE	UP	uncharacterized protein LOC108975557
Cluster-37835.0	0.06	0	0.395	0.5825	0.6825	FALSE	DOWN	FALSE	FALSE	fibroblast growth factor receptor 4-like
Cluster-38217.0	0.0325	0	0.3075	0	0.315	FALSE	DOWN	UP	FALSE	cuticle protein 10.9-like
Cluster-38399.0	1.2425	0.495	0.13	0.6975	0.33	UP	UP	DOWN	FALSE	probable ATP-dependent DNA helicase HFM1 isoform X1
Cluster-38671.0	1.4625	1.2875	3.23	3.465	3.01	FALSE	DOWN	FALSE	FALSE	uncharacterized protein LOC100158898
Cluster-38686.0	0.31	0.265	0.9375	0.8975	0.5025	FALSE	DOWN	FALSE	FALSE	uncharacterized protein LOC107885924
Cluster-38753.2	0.615	0.1875	0.01	0.0775	0.16	FALSE	UP	FALSE	FALSE	uncharacterized protein LOC111037218
Cluster-38839.1	0.31	0.055	0.095	0.2625	0.3975	UP	FALSE	FALSE	FALSE	dynein heavy chain 3, axonemal-like
Cluster-38967.0	1.93	1.31	0.935	2.205	2.5675	FALSE	FALSE	DOWN	FALSE	nuclear transcription factor Y subunit alpha-like isoform X1
Cluster-39071.0	1.7675	1.1575	0.525	1.2225	1.3825	FALSE	UP	DOWN	FALSE	uncharacterized protein LOC100163901
Cluster-39237.0	1.43	0.6725	0.525	0.505	0.765	UP	FALSE	FALSE	FALSE	transient receptor potential cation channel subfamily A member 1
Cluster-39564.0	0.67	0.4825	1.15	1.5	1.82	FALSE	DOWN	FALSE	FALSE	acetyl-coenzyme A transporter 1 isoform X1
Cluster-40247.0	0.2575	0.175	0.0875	0.73	0.625	FALSE	FALSE	DOWN	FALSE	KRAB-A domain-containing protein 2-like
Cluster-40387.0	0.5	0.42	0.1275	0.2025	0.2425	FALSE	UP	FALSE	FALSE	uncharacterized protein LOC100570038 isoform X1
Cluster-40399.0	1.76	1.2075	1.9475	0.66	0.6075	FALSE	FALSE	UP	FALSE	elongation of very long chain fatty acids protein 4
Cluster-40729.0	1.5775	0.8775	0.335	0.865	1.33	FALSE	UP	DOWN	FALSE	PDF receptor
Cluster-40741.0	0.975	0.405	0.2125	0.2	0.335	UP	FALSE	FALSE	FALSE	uncharacterized protein LOC111038488
Cluster-41002.0	1.5575	0.6675	1.155	0.965	0.7875	UP	FALSE	FALSE	FALSE	liver carboxylesterase 2
Cluster-41161.2	0.485	0.09	0.0225	0.255	0.8375	FALSE	FALSE	DOWN	DOWN	uncharacterized protein LOC111030274
Cluster-41198.0	0.17	0.31	0.405	0.055	0.115	FALSE	FALSE	UP	FALSE	uncharacterized protein LOC111027853
Cluster-41214.0	7.7775	3.5225	1.365	3.42	2.5975	UP	FALSE	FALSE	FALSE	histidine-rich glycoprotein-like
Cluster-41215.0	0.185	0.0575	1.38	0.165	0.255	FALSE	DOWN	FALSE	FALSE	paramyosin, long form isoform X1
Cluster-41406.0	0.7175	0.2375	0.6175	0.6325	0.545	UP	FALSE	FALSE	FALSE	glucose dehydrogenase
Cluster-5795.0	0.015	0.26	3.0275	0.62	0	FALSE	FALSE	FALSE	UP	E3 ubiquitin-protein ligase complex slx8-rfp subunit slx8
Cluster-6300.0	1.63	0	0.0825	0.1025	0	UP	FALSE	FALSE	FALSE	uncharacterized protein LOC100575815
Cluster-6524.0	3.315	0.075	0.125	0.37	0	UP	FALSE	FALSE	FALSE	uncharacterized protein LOC107165607
Cluster-7188.0	618.055	691.45	323.922	248.555	264.383	FALSE	UP	FALSE	FALSE	macrophage migration inhibitory factor-like protein
Cluster-8047.0	0.855	0.0075	0.145	0.1225	0	UP	DOWN	FALSE	FALSE	UDP-glucuronosyltransferase 2B2
Cluster-847.1	1.06	0.635	1.59	1.61	1.995	FALSE	DOWN	FALSE	FALSE	forkhead box protein J1.2-like
Cluster-8476.0	1.0025	0	0.0675	0.0475	0	UP	FALSE	FALSE	FALSE	NADH dehydrogenase
Cluster-858.3	0.015	0.0775	0.955	0.195	0.0025	FALSE	FALSE	FALSE	UP	hypothetical protein FF38_14449
Cluster-8761.0	1.5575	0.085	0.0775	0.3725	0	FALSE	FALSE	FALSE	UP	leukocyte elastase inhibitor
Cluster-8858.0	0.0225	0.2425	1.4725	0.35	0	FALSE	FALSE	FALSE	UP	neurobeachin isoform X8
Cluster-8894.0	0	0.175	3.51	0.2975	0	DOWN	FALSE	FALSE	FALSE	histone-lysine N-methyltransferase SETMAR-like
Cluster-9017.0	6.675	0.3175	0.385	0.4925	0	UP	FALSE	FALSE	FALSE	ACYPI000043
Cluster-9311.0	0.01	0.0525	0.8575	0.1275	0	FALSE	FALSE	FALSE	UP	uncharacterized protein LOC105231532
Cluster-9482.0	0.055	0.1375	1.085	0.1575	0	FALSE	FALSE	FALSE	UP	ATPase family AAA domain-containing protein 5 isoform X1
Cluster-9514.2	3.43	0.145	0.3425	1.0825	0.0475	UP	FALSE	FALSE	UP	repetitive proline-rich cell wall protein 2-like
Cluster-9615.0	0.0025	0.0675	0.7625	0.2275	0	FALSE	FALSE	FALSE	UP	uncharacterized protein LOC108972795 isoform X1
Cluster-9880.0	516.59	487.492	212.47	162.382	161.935	FALSE	UP	FALSE	FALSE	ACYPI003547
Note: Only the differentially expressed unigenes with a NR annotation was listed in this table.

## Sheet: Table S3
Table S3. Differentially expressed unigenes between the wingless and winged aphids.
Gene_ID	FPKM_AW	FPKM_AY	Sig. (AWvsAY)	NR_Description
Cluster-26641.20980	16.93	42.285	DOWN	ATP-binding cassette sub-family G member 4-like
Cluster-26641.20983	2.01	10.105	DOWN	transforming growth factor-beta-induced protein ig-h3
Cluster-26641.6140	2.0275	0.42	UP	acyl-CoA synthetase short-chain family member 3, mitochondrial
Cluster-5821.0	0	0.62	DOWN	cyclin-H
Cluster-26641.11974	0.98	0.205	UP	LOW QUALITY PROTEIN: centromere-associated protein E
Cluster-26641.25302	0.0125	0.37	DOWN	ankyrin repeat domain-containing protein 49
Cluster-26641.25304	0.0075	0.16	DOWN	dystrophin, isoforms A..C..F..G..H isoform X4
Cluster-26641.25122	0.0025	0.0625	DOWN	LOW QUALITY PROTEIN: zinc finger SWIM domain-containing protein 8
Cluster-26641.24470	0.01	0.2075	DOWN	ppk
Cluster-26641.5348	19.04	40.6275	DOWN	hypothetical protein TTRE_0000953901
Cluster-26641.5349	1.4525	6.3675	DOWN	hypothetical protein CRE_03576
Cluster-26641.5699	7.86	2.2375	UP	tyrosine-protein phosphatase Lar
Cluster-26641.5693	7.6425	13.0675	DOWN	aminopeptidase N
Cluster-26641.17642	48.98	14.5125	UP	peptidyl-prolyl cis-trans isomerase-like
Cluster-26641.7188	3.8175	0.83	UP	LOW QUALITY PROTEIN: very-long-chain 3-oxoacyl-CoA reductase-like
Cluster-26641.6635	5.6725	1.515	UP	solute carrier family 25 member 35-like isoform X1
Cluster-26641.2634	0.225	0.6775	DOWN	leucine-rich repeat extensin-like protein 5
Cluster-26641.8098	2.1225	0.1775	UP	UDP-glucuronosyltransferase 2C1-like
Cluster-26641.8097	6.045	1.1925	UP	UDP-glucuronosyltransferase 2C1-like
Cluster-27113.0	0.0375	0.5975	DOWN	uncharacterized protein LOC105233976
Cluster-26641.10896	4.4025	1.335	UP	uncharacterized protein LOC100166576 isoform X1
Cluster-26641.20976	1.6025	2.36	DOWN	prostatic acid phosphatase-like isoform X1
Cluster-26641.25428	0.2175	2.8125	DOWN	transcription elongation factor B polypeptide 1
Cluster-26641.8134	0.09	2.0875	DOWN	ACYPI008325
Cluster-26641.13161	182.613	320.76	DOWN	Cell wall-associated hydrolase
Cluster-26641.6038	0.26	0.9525	DOWN	hypothetical protein PFMALIP_03290
Cluster-27110.0	0.3325	0.6925	DOWN	bumetanide-sensitive sodium-..potassium..-chloride cotransporter-like
Cluster-26641.9402	2.855	0.5875	UP	nicotinic acetylcholine receptor alpha 7-1 subunit
Cluster-26641.10989	16.5325	33.4625	DOWN	leucine-rich repeat-containing protein 57
Cluster-26641.17039	22.025	6.2525	UP	ornithine aminotransferase, mitochondrial-like
Cluster-32718.0	0.005	0.1875	DOWN	uncharacterized protein LOC105231977
Cluster-34160.0	0.0075	0.2125	DOWN	probable hydroxyacid-oxoacid transhydrogenase, mitochondrial
Cluster-14037.0	0.0075	0.3625	DOWN	negative elongation factor B
Cluster-24698.0	0.15	0.425	DOWN	putative uncharacterized protein DDB_G0282133
Cluster-14543.0	0.03	0.4825	DOWN	26S proteasome non-ATPase regulatory subunit 9
Cluster-26641.1099	0.0025	0.105	DOWN	zinc finger protein 82 homolog
Cluster-26641.1090	0.025	0.6625	DOWN	ceramide phosphoethanolamine synthase
Cluster-26641.12218	10.3725	1.6225	UP	UDP-glucuronosyltransferase 2B14
Cluster-26641.8113	6.9125	9.21	DOWN	uncharacterized protein LOC107163444 isoform X1
Cluster-26641.17379	10.72	14.395	DOWN	protein yellow-like isoform X2
Cluster-26641.4501	0.3825	0.675	DOWN	cytokine receptor-like
Cluster-26641.21901	0.035	0.5125	DOWN	sodium-coupled monocarboxylate transporter 1
Cluster-21694.0	0.055	0.715	DOWN	probable ATP-dependent RNA helicase DDX43
Cluster-15769.0	0.005	0.385	DOWN	mediator of RNA polymerase II transcription subunit 19
Cluster-20002.1	0.1375	0.5875	DOWN	dihydroxy-acid dehydratase, mitochondrial-like, partial
Cluster-29278.0	0.045	1.3025	DOWN	U1 small nuclear ribonucleoprotein C
Cluster-26641.6728	6.985	2.0425	UP	uncharacterized protein LOC100168837
Cluster-8347.0	0	0.215	DOWN	uncharacterized protein LOC108362899
Cluster-26641.2225	0.105	0.3825	DOWN	olfactory receptor 20 protein
Cluster-26641.14521	10.8125	2.105	UP	uncharacterized protein LOC100165115
Cluster-26641.12677	0.5425	2.4	DOWN	CLUMA_CG003286, isoform A
Cluster-26641.1754	2.8	0.8175	UP	serine..threonine-protein kinase PLK4
Cluster-26641.25387	0.0675	0.775	DOWN	oxygen-dependent coproporphyrinogen-III oxidase isoform X2
Cluster-26641.19872	9.385	23.6	DOWN	amine sulfotransferase-like
Cluster-26641.3792	3.5125	1.04	UP	ATP-dependent RNA helicase vasa-like
Cluster-13711.0	0.005	0.1625	DOWN	oxysterol-binding protein-related protein 8
Cluster-8344.0	0	0.345	DOWN	ankyrin repeat domain-containing protein 12
Cluster-26641.3868	0.04	0.7325	DOWN	helicase SRCAP-like
Cluster-35999.0	7.58	0.95	UP	uncharacterized protein LOC107169136
Cluster-26641.4073	0.9375	0.255	UP	acetyl-coenzyme A transporter 1-like
Cluster-26641.13899	184.248	34.21	UP	uncharacterized protein LOC107163485
Cluster-26641.20103	2.8125	6.4	DOWN	histone H3-like centromeric protein CSE4-like
Cluster-9731.0	0	0.39	DOWN	RRP15-like protein
Cluster-36622.0	0.05	1.435	DOWN	coiled-coil domain-containing protein 25
Cluster-26641.20437	13.3875	24.01	DOWN	orcokinin peptides type A isoform X2
Cluster-26641.17450	22.4525	44.9725	DOWN	myosin-J heavy chain
Cluster-26641.14221	238.352	55.89	UP	macrophage migration inhibitory factor homolog
Cluster-29986.0	0.135	0.52	DOWN	hypothetical protein D910_00972
Cluster-8173.0	0	0.2075	DOWN	mothers against decapentaplegic homolog 3
Cluster-26641.14483	6.3575	1.6075	UP	alpha,alpha-trehalose-phosphate synthase
Cluster-26641.15577	62.6375	18.8975	UP	putative innexin 3
Cluster-26641.15681	44.155	13.06	UP	ACYPI33755
Cluster-26641.10866	32.07	8.1725	UP	lysozyme-like
Cluster-26641.8608	20.815	26.475	DOWN	AMP deaminase 2 isoform X6
Cluster-26641.16881	9.67	14.6875	DOWN	uncharacterized protein LOC107166394
Cluster-31479.0	0.045	1.04	DOWN	ubiquitin-conjugating enzyme E2 L3
Cluster-15808.0	0.03	0.4375	DOWN	polygalacturonase-like, partial
Cluster-26641.18665	5.7075	7.2025	DOWN	modular serine protease-like isoform X1
Cluster-26641.10726	1.08	0.325	UP	uncharacterized protein LOC111040078
Cluster-32743.1	0.205	0.585	DOWN	aldehyde dehydrogenase-like
Cluster-26641.124	0	0.865	DOWN	N-alpha-acetyltransferase 40
Cluster-26641.10671	22.0225	6.2925	UP	acyl-CoA Delta..11.. desaturase-like
Cluster-26641.5268	12.22	15.96	DOWN	cell division cycle protein 23 homolog
Cluster-26641.5260	2.7425	6.5	DOWN	dihydroxyacetone kinase 1-like
Cluster-26641.5264	2.59	0.6875	UP	NAD-dependent protein deacetylase Sirt6
Cluster-31079.0	0.0025	0.515	DOWN	serrate RNA effector molecule homolog isoform X1
Cluster-8963.0	0	0.1775	DOWN	growth hormone-regulated TBC protein 1-A
Cluster-26641.22075	8.11	10.185	DOWN	cytochrome P450 CYP6A2
Cluster-26641.20209	6.2225	0.975	UP	thiamine transporter 1-like
Cluster-26641.14973	198.118	43.59	UP	cytochrome P450 6CY19
Cluster-15370.0	0	0.255	DOWN	regucalcin
Cluster-3847.1	0.02	0.395	DOWN	exportin-5
Cluster-34880.0	0.1175	0.3375	DOWN	glycolate oxidase subunit GlcD-like
Cluster-26641.13162	7.6075	11.835	DOWN	Cell wall-associated hydrolase
Cluster-26641.16608	6.945	16.78	DOWN	calponin homology domain-containing protein DDB_G0272472 isoform X1
Cluster-26641.5342	0	0.1425	DOWN	DNA topoisomerase 1 isoform X2
Cluster-26641.5840	4.74	6.555	DOWN	zinc finger protein 521 isoform X2
Cluster-26641.13831	34.325	45.24	DOWN	neurofilament medium polypeptide-like
Cluster-8626.0	0	0.4175	DOWN	bystin
Cluster-26641.22090	21.525	78.0175	DOWN	uncharacterized protein LOC111042676
Cluster-26641.9458	16.0275	4.4675	UP	probable cation-transporting ATPase 13A3 isoform X1
Cluster-26641.11157	12.62	18.32	DOWN	4-coumarate--CoA ligase 3
Cluster-26641.11155	5.6675	8.6775	DOWN	4-coumarate--CoA ligase 3-like
Cluster-25345.2	0.3425	1.1275	DOWN	glutamate receptor ionotropic, kainate 2
Cluster-25345.1	0.9375	1.4475	DOWN	glutamate receptor ionotropic, kainate 2
Cluster-26641.20793	0.0625	0.67	DOWN	protein ZBED8-like
Cluster-26641.24852	0	0.2225	DOWN	beta-1,4-mannosyltransferase egh
Cluster-26641.6905	1.9225	0.3925	UP	proliferating cell nuclear antigen
Cluster-26641.17964	3.9025	5.3875	DOWN	sodium..potassium..calcium exchanger 3-like
Cluster-26641.5310	3.6525	1.0275	UP	zinc transporter ZIP1-like
Cluster-26641.11232	1.42	0.3625	UP	UDP-glucuronosyltransferase 2B1
Cluster-26641.4418	0.7675	0.2075	UP	polycystin-2-like isoform X2
Cluster-26641.8259	12.2	18.1325	DOWN	kelch-like protein 17
Cluster-26641.12156	73.54	109.055	DOWN	protein suppressor of white apricot isoform X2
Cluster-26641.3037	4.0075	7.1875	DOWN	b..0,+..-type amino acid transporter 1
Cluster-26641.14399	494.433	129.402	UP	LOW QUALITY PROTEIN: fatty acid synthase-like
Cluster-26641.14390	83.82	151.703	DOWN	NADH dehydrogenase subunit 4 ..mitochondrion..
Cluster-14358.0	0	0.15	DOWN	exonuclease mut-7 homolog
Cluster-26641.14648	413.95	36.635	UP	esterase E4-like isoform X1
Cluster-26641.7173	12.225	0.58	UP	legumain-like
Cluster-26641.18992	7.3525	2.255	UP	serine..threonine-protein phosphatase 2A catalytic subunit alpha isoform
Cluster-26641.7176	16.64	47.2475	DOWN	longwave opsin
Cluster-26641.15118	4.7875	0.4225	UP	phosphatidylinositol phosphatase PTPRQ isoform X1
Cluster-35454.0	0.02	0.3225	DOWN	lipase 3
Cluster-26641.7454	14.1325	3.29	UP	uncharacterized protein LOC100574588
Cluster-37836.0	1.53	5.0975	DOWN	capB
Cluster-26641.5145	1.2925	1.9025	DOWN	organic cation transporter protein
Cluster-26641.4899	0.4925	0.075	UP	uncharacterized protein LOC105391048
Cluster-26641.4233	1.2075	2.89	DOWN	uncharacterized protein LOC111620395
Cluster-26641.17722	32.7825	47.7175	DOWN	protein quiver isoform X2
Cluster-34527.0	0.0375	0.6025	DOWN	general transcription factor IIF subunit 1
Cluster-26641.9085	3.32	0.655	UP	nudix hydrolase 2
Cluster-26641.8932	79.7875	108	DOWN	gamma-aminobutyric acid receptor-associated protein
Cluster-26641.1657	2.455	0.595	UP	neurotrimin-like
Cluster-26641.25267	0.0125	1.245	DOWN	ice-structuring glycoprotein
Cluster-15441.0	0.0075	0.45	DOWN	uncharacterized protein LOC105230336
Cluster-26641.15332	142.39	206.215	DOWN	hypothetical protein IscW_ISCW024385
Cluster-24229.0	0.0175	0.37	DOWN	stromal membrane-associated protein 1
Cluster-39047.0	0.01	0.2575	DOWN	LOW QUALITY PROTEIN: ribonucleases P..MRP protein subunit POP1
Cluster-26641.19068	7.005	10.5375	DOWN	pseudouridine-5'-phosphate glycosidase isoform X1
Cluster-18378.1	0	0.5	DOWN	yccS
Cluster-8682.0	0	0.1775	DOWN	uncharacterized protein LOC105231201
Cluster-15520.0	0.0075	0.5375	DOWN	LOW QUALITY PROTEIN: histone acetyltransferase KAT8-like
Cluster-26641.24568	0.8475	1.1825	DOWN	uncharacterized protein LOC111032633
Cluster-13566.0	0	0.3425	DOWN	uncharacterized protein LOC108969603
Cluster-26641.7514	58.785	133.81	DOWN	skin secretory protein xP2-like
Cluster-26641.4914	1.145	4.8125	DOWN	LOW QUALITY PROTEIN: uncharacterized protein LOC111031556
Cluster-31179.0	4.5225	0.7325	UP	synaptic vesicle glycoprotein 2C isoform X1
Cluster-22888.0	0.0175	0.2975	DOWN	uncharacterized protein LOC105223561
Cluster-26641.18200	0.605	1.2975	DOWN	4-aminobutyrate aminotransferase, mitochondrial
Cluster-26641.983	0	0.435	DOWN	glutamate--cysteine ligase regulatory subunit
Cluster-26641.25216	0.045	1.1775	DOWN	heterogeneous nuclear ribonucleoprotein K isoform X3
Cluster-26641.17552	35.785	6.0275	UP	uncharacterized protein LOC107163111
Cluster-26641.10687	1.84	3.9475	DOWN	E3 SUMO-protein ligase PIAS2-like
Cluster-26641.25534	0.005	0.1875	DOWN	protein lethal..2..denticleless
Cluster-33887.0	0.05	0.645	DOWN	elongation factor Ts, mitochondrial
Cluster-31722.0	0.0375	0.5175	DOWN	xseA
Cluster-26641.25093	0.09	1.145	DOWN	proteasome activator complex subunit 3
Cluster-30086.0	0	0.135	DOWN	putative ATP-dependent RNA helicase DHX33
Cluster-8224.0	0	0.685	DOWN	N..G..,N..G..-dimethylarginine dimethylaminohydrolase 1
Cluster-26641.10557	2.145	0.4325	UP	small conductance calcium-activated potassium channel protein
Cluster-24291.0	0.095	1.185	DOWN	charged multivesicular body protein 4c
Cluster-26641.1532	0.025	0.265	DOWN	structural maintenance of chromosomes protein 3
Cluster-26641.13396	162.678	19.475	UP	cystathionine gamma-lyase
Cluster-26641.17875	28.88	8.51	UP	dolichyl-diphosphooligosaccharide--protein glycosyltransferase subunit 1 isoform X1
Cluster-26641.1421	0.01	0.345	DOWN	protein pellino
Cluster-26641.15606	0.445	1.1275	DOWN	alpha-tocopherol transfer protein-like
Cluster-26641.15605	12.4925	20.8425	DOWN	alpha-tocopherol transfer protein-like
Cluster-26641.4497	0.75	0.22	UP	uncharacterized protein K02A2.6-like isoform X2
Cluster-26641.11583	58.56	90.06	DOWN	uncharacterized protein LOC111042674
Cluster-26641.13208	282.355	37.5775	UP	esterase E4-like isoform X2
Cluster-26641.13207	1929.6	313.195	UP	esterase FE4-like
Cluster-26641.1164	0.065	0.715	DOWN	protein shuttle craft
Cluster-26641.16529	29.2875	8.5275	UP	cytochrome P450 6CY9
Cluster-27428.0	0.8475	1.315	DOWN	LOW QUALITY PROTEIN: fibulin-2-like
Cluster-26641.13975	96.1925	2.04	UP	uncharacterized protein LOC111038926
Cluster-26641.13974	1.555	0	UP	uncharacterized protein LOC111036037
Cluster-26641.25111	0.21	2.115	DOWN	proteasome subunit beta type-7
Cluster-26641.19535	0.84	4.4575	DOWN	uncharacterized protein LOC100167416
Cluster-26641.15191	15.545	4.6225	UP	laminin subunit gamma-1 isoform X1
Cluster-26641.12615	11.7625	3.3	UP	protein YIF1B
Cluster-26641.13567	65.43	15.625	UP	UDP-glucuronosyl transferase 349A2
Cluster-34106.0	0.0375	0.7875	DOWN	autophagy protein 5
Cluster-26641.13701	1892.37	211.322	UP	endocuticle structural glycoprotein SgAbd-2-like isoform X2
Cluster-34877.0	0.155	1.9175	DOWN	ER membrane protein complex subunit 3
Cluster-26641.7931	8.735	2.3675	UP	ACYPI30454
Cluster-26641.3896	1.3675	0.31	UP	acetyl-coenzyme A transporter 1-like
Cluster-26641.8165	2.825	0.7725	UP	eukaryotic translation initiation factor 4 gamma 3 isoform X2
Cluster-36586.0	0.54	1.52	DOWN	olfactory receptor 31 protein
Cluster-26641.2387	0.065	1.1225	DOWN	lipoyltransferase 1, mitochondrial
Cluster-26641.2384	2.8225	0.61	UP	serine..threonine-protein kinase BRSK2 isoform X1
Cluster-8838.0	0	0.8025	DOWN	uncharacterized protein LOC105229528
Cluster-37490.0	0.03	0.3325	DOWN	AP-1 complex subunit beta-1
Cluster-26641.9200	1.98	0.51	UP	putative uncharacterized protein DDB_G0282133
Cluster-26641.13011	62.09	76.465	DOWN	protein stunted isoform X2
Cluster-26641.13013	37.15	2.76	UP	beta-galactosidase
Cluster-26641.16197	3.9	0.5925	UP	uncharacterized protein LOC100575385
Cluster-32910.0	0.675	2.43	DOWN	uncharacterized protein LOC100165045 isoform X2
Cluster-26641.14120	16349.1	281.707	UP	uncharacterized protein LOC111038926
Cluster-26641.12008	93.295	206.178	DOWN	uncharacterized protein LOC111040419
Cluster-26641.13918	5.3175	10.18	DOWN	rho guanine nucleotide exchange factor 7 isoform X2
Cluster-29504.0	0.0075	0.18	DOWN	RING finger protein B
Cluster-26641.5026	1.5775	2.9875	DOWN	uncharacterized protein LOC100163923
Cluster-26641.5023	8.0175	33.0275	DOWN	arrestin homolog
Cluster-26641.5020	0.02	0.4375	DOWN	cAMP-dependent protein kinase type I regulatory subunit isoform X1
Cluster-26641.5029	0	1.1675	DOWN	uncharacterized protein LOC111037974
Cluster-34579.0	0.82	6.29	DOWN	sodium- and chloride-dependent GABA transporter 2-like
Cluster-26641.7876	6.945	1.85	UP	ACYPI001606
Cluster-34658.0	0.01	0.355	DOWN	CUGBP Elav-like family member 2 isoform X2
Cluster-26641.17009	1.455	0.04	UP	maltase A1
Cluster-26641.5569	3.265	4.505	DOWN	corticotropin-releasing factor-binding protein
Cluster-26641.2022	0.175	0.4575	DOWN	hypothetical protein TVAG_413280
Cluster-26641.21323	0.39	0.945	DOWN	ABC transporter G family member 23 variant X2
Cluster-26641.14727	57.145	15.0925	UP	collagen alpha-5..IV.. chain-like
Cluster-23104.0	0.045	0.98	DOWN	protein phosphatase inhibitor 2
Cluster-26641.15097	1.805	0.3975	UP	uncharacterized protein LOC107884708 isoform X2
Cluster-7701.0	0	0.375	DOWN	hypothetical protein WR25_20174
Cluster-26641.8003	6.47	18.8025	DOWN	protein kinase 3 isoform X1
Cluster-9701.0	0	1.165	DOWN	uncharacterized protein LOC108969566
Cluster-26641.25663	0.07	0.465	DOWN	ilvD
Cluster-26641.20813	1.88	5.3525	DOWN	heat shock protein 70 A1-like
Cluster-16689.0	0.0125	0.25	DOWN	putative nuclease HARBI1
Cluster-26641.7524	20.155	3.71	UP	annexin B11-like
Cluster-26641.20749	3.5825	4.5125	DOWN	acetylcholine receptor subunit alpha-like isoform X3
Cluster-26641.20743	12.1975	3.105	UP	FERM domain-containing protein 5 isoform X1
Cluster-26641.16250	12.6925	3.6725	UP	slit homolog 2 protein
Cluster-29949.0	0.2325	0.465	DOWN	insertion sequence IS21 putative ATP-binding protein-like
Cluster-26641.10965	3.4925	0.8175	UP	eukaryotic translation initiation factor 2A
Cluster-35931.0	0.2675	0.015	UP	E3 ubiquitin-protein ligase RNF123-like
Cluster-26641.12698	47.805	0.5375	UP	uncharacterized protein LOC111036037
Cluster-26641.12693	6.0875	0.615	UP	fatty acid synthase 3
Cluster-26641.12694	552.905	85.74	UP	fatty acid synthase 3
Cluster-26641.16937	14.9875	21.0925	DOWN	protein PF14_0175
Cluster-26641.11378	21.055	27.1475	DOWN	sushi, von Willebrand factor type A, EGF and pentraxin domain-containing protein 1 isoform X5
Cluster-38055.0	0.0475	0.5025	DOWN	glycerol-3-phosphate dehydrogenase, mitochondrial
Cluster-22958.0	0.07	1.105	DOWN	60S ribosomal protein L7
Cluster-26641.14388	87.585	127.225	DOWN	NADH dehydrogenase subunit 4 ..mitochondrion..
Cluster-26641.3815	0.93	0.1275	UP	uncharacterized protein LOC111040433
Cluster-28613.0	0.0875	1.065	DOWN	syntaxin-16 isoform X1
Cluster-26641.21622	0.0275	0.755	DOWN	phenylalanine--tRNA ligase beta subunit
Cluster-16517.0	0.01	0.4675	DOWN	peroxisomal biogenesis factor 19
Cluster-25994.0	0.0925	1.1675	DOWN	LOW QUALITY PROTEIN: dolichyl-diphosphooligosaccharide--protein glycosyltransferase subunit 1
Cluster-26641.15048	23.0325	37.6925	DOWN	uncharacterized protein LOC107166211
Cluster-26641.15939	8.06	10.715	DOWN	agrin-like
Cluster-26641.15934	16.345	5.1125	UP	zinc transporter 2-like isoform X1
Cluster-23917.1	0.2875	0.9475	DOWN	dynein light chain 1, axonemal-like
Cluster-26641.1339	0.0125	0.285	DOWN	SWI..SNF complex subunit SMARCC2 isoform X1
Cluster-26641.16777	0.585	1.13	DOWN	tyrosine-protein phosphatase non-receptor type 9-like isoform X3
Cluster-26641.17799	22.3675	50.1225	DOWN	TBC1 domain family member 1 isoform X1
Cluster-16389.0	0	0.6175	DOWN	retinol dehydrogenase 12
Cluster-25469.0	0.04	0.38	DOWN	probable protein phosphatase 2C T23F11.1
Cluster-26641.15032	21.385	5.1175	UP	uncharacterized protein LOC100162791
Cluster-26641.11687	12.895	3.3225	UP	zinc finger protein 608-like isoform X1
Cluster-26641.18656	13.54	3.8825	UP	homeobox protein Hox-A4-like
Cluster-26641.14786	18.4825	5.745	UP	short..branched chain specific acyl-CoA dehydrogenase, mitochondrial
Cluster-40038.0	0.0175	0.7525	DOWN	uncharacterized protein C9orf85 homolog
Cluster-40491.0	0.0125	0.4575	DOWN	receptor-type tyrosine-protein phosphatase kappa
Cluster-26641.11327	170.665	15.38	UP	esterase E4-like isoform X1
Cluster-38159.0	0.01	0.245	DOWN	synaptojanin-1
Cluster-22907.0	0.0025	0.2275	DOWN	transcription elongation factor SPT5
Cluster-32135.0	0	0.9725	DOWN	uncharacterized protein LOC105223447
Cluster-22431.0	0.035	0.665	DOWN	uncharacterized LOC100166657 isoform X1
Cluster-26641.10538	13.775	3.81	UP	acyl-CoA synthetase family member 2, mitochondrial
Cluster-8261.0	0	0.2725	DOWN	protein rhomboid
Cluster-40518.0	0.015	0.3825	DOWN	mitogen-activated protein kinase 14B
Cluster-26641.4651	0.0075	0.19	DOWN	protein Star
Cluster-26641.7458	9.4	2.3075	UP	glutamate decarboxylase isoform X2
Cluster-26641.8498	0.32	0.7375	DOWN	protein translocase subunit SecY-like
Cluster-25949.0	0.2475	0.625	DOWN	adenosylmethionine-8-amino-7-oxononanoate aminotransferase-like
Cluster-26641.2898	0	2.4575	DOWN	uncharacterized protein LOC100164067 isoform X1
Cluster-26641.16091	19.2475	2.22	UP	uncharacterized protein LOC100302387 precursor
Cluster-26641.10890	1.4875	0.3975	UP	uncharacterized protein LOC107885824, partial
Cluster-26641.19184	10.1425	18.2125	DOWN	long-chain-fatty-acid--CoA ligase 5
Cluster-26641.938	0.0275	0.495	DOWN	apyrase isoform X2
Cluster-8900.0	0	0.205	DOWN	zinc finger protein 704 isoform X1
Cluster-17031.0	0.005	0.1275	DOWN	transcription initiation factor TFIID subunit 5
Cluster-26641.11186	7.3825	1.81	UP	uncharacterized protein LOC111032403
Cluster-26641.14006	1867.55	384.925	UP	fatty acid synthase-like
Cluster-26641.14009	138.535	248.428	DOWN	adhesive plaque matrix protein
Cluster-26641.19403	1.7575	0.1975	UP	uncharacterized protein LOC111030932
Cluster-26641.12766	32.385	8.15	UP	pancreatic lipase-related protein 2-like
Cluster-29928.0	0.0175	0.2075	DOWN	methionine--tRNA ligase, cytoplasmic
Cluster-26641.11835	14.3025	24.8575	DOWN	cathepsin B-like cysteine proteinase 3
Cluster-26641.5486	3.745	0.82	UP	uncharacterized protein LOC111028759
Cluster-26641.5738	4.455	6.605	DOWN	venom carboxylesterase-6
Cluster-26641.5734	2.0775	3.445	DOWN	uncharacterized protein LOC111031943 isoform X1
Cluster-26641.1723	2.6375	4.085	DOWN	uncharacterized protein LOC107168595 isoform X1
Cluster-26641.11432	6.0125	8.765	DOWN	laccase-1-like
Cluster-26641.17712	2.2225	0.3875	UP	LOW QUALITY PROTEIN: uncharacterized protein LOC111616963
Cluster-26641.2916	0.205	2.94	DOWN	ACYPI000294
Cluster-26641.18134	6.1925	1.32	UP	protein charlatan isoform X2
Cluster-26641.21853	0.9025	3.195	DOWN	hypothetical protein CRE_03576
Cluster-26641.25169	0.0575	1.105	DOWN	high mobility group protein DSP1 isoform X2
Cluster-26641.20817	4.81	18.3675	DOWN	pancreatic triacylglycerol lipase-like
Cluster-26641.20812	6.385	13.86	DOWN	heat shock protein 68-like
Cluster-26641.20818	2.4175	9.9625	DOWN	pancreatic triacylglycerol lipase
Cluster-26641.10935	22.905	32.245	DOWN	WD repeat-containing protein 26
Cluster-26641.21333	2.46	0.685	UP	synaptic vesicle glycoprotein 2B isoform X1
Cluster-26641.7401	0.7775	3.705	DOWN	uncharacterized protein LOC107170552
Cluster-26641.24950	0.01	0.4725	DOWN	dual specificity protein kinase splA
Cluster-26641.9396	0.9075	2.395	DOWN	uncharacterized protein LOC111035930
Cluster-26641.1329	0.0025	0.18	DOWN	cullin-5
Cluster-26641.13422	9.7975	25.99	DOWN	facilitated trehalose transporter Tret1-2 homolog
Cluster-26641.17716	1.8725	0.2075	UP	Retrovirus-related Pol polyprotein from transposon 412-like Protein
Cluster-26641.17715	6.5525	2.0125	UP	diencephalon..mesencephalon homeobox protein 1-like isoform X3
Cluster-40582.0	0.115	1.5225	DOWN	small glutamine-rich tetratricopeptide repeat-containing protein beta
Cluster-33135.0	0.0375	1.2	DOWN	carbonic anhydrase 2-like
Cluster-26641.1910	0.355	0.6575	DOWN	uncharacterized protein LOC100570038 isoform X1
Cluster-26641.10154	2.2725	0.49	UP	extensin
Cluster-26641.15529	17.6825	5.4775	UP	probable serine hydrolase isoform X2
Cluster-26641.15520	57.8	10.9025	UP	skin secretory protein xP2-like
Cluster-30761.0	0.055	0.675	DOWN	progestin and adipoQ receptor family member 3
Cluster-26641.15386	6.8775	95.0425	DOWN	Retrovirus-related Pol polyprotein from transposon 412-like Protein
Cluster-26641.9303	11.04	3.3125	UP	sushi, von Willebrand factor type A, EGF and pentraxin domain-containing protein 1
Cluster-26641.776	0.015	0.3725	DOWN	origin recognition complex subunit 6
Cluster-26641.13609	15.7025	2.785	UP	protein big brother
Cluster-26641.13600	52.2875	8.6225	UP	protein scarlet
Cluster-26641.13603	34.2025	47.335	DOWN	elongation of very long chain fatty acids protein AAEL008004 isoform X2
Cluster-17040.0	0	0.26	DOWN	TNF receptor-associated factor 6
Cluster-26641.17836	12.1325	3.59	UP	mitochondrial ornithine transporter 1-like
Cluster-26641.3249	3.4525	5.9725	DOWN	transcriptional regulator ATRX homolog isoform X3
Cluster-26641.3248	0.275	0.5925	DOWN	transcriptional regulator ATRX homolog
Cluster-26641.14431	7.5375	1.425	UP	hypothetical protein B5V51_7057
Cluster-10023.0	0.01	2.8475	DOWN	uncharacterized protein LOC111029818
Cluster-26641.19031	2.265	3.9	DOWN	nuclear receptor coactivator 3 isoform X1
Cluster-26641.11600	1.6825	0.4375	UP	chromobox protein homolog 3
Cluster-34862.0	0	0.3475	DOWN	regulatory protein zeste
Cluster-26641.5213	1.08	1.4925	DOWN	uncharacterized protein LOC111030207
Cluster-20420.1	0.0275	0.5025	DOWN	uncharacterized protein LOC105840830
Cluster-26641.12559	1613.62	204.555	UP	macrophage migration inhibitory factor homolog
Cluster-26641.24088	0	0.4525	DOWN	uncharacterized protein CG4449
Cluster-26641.6206	2.7075	0.625	UP	SAC3 family protein 1-like
Cluster-26641.7064	9.505	15.2525	DOWN	uncharacterized protein LOC100572493 isoform X2
Cluster-26641.774	0	0.32	DOWN	gastrula zinc finger protein XlCGF26.1-like
Cluster-26641.8647	1.6675	6.67	DOWN	phosphoenolpyruvate carboxykinase
Cluster-36277.0	0.495	1.3075	DOWN	rplU
Cluster-26641.11101	8.9275	16.125	DOWN	uncharacterized protein LOC111039736
Cluster-26641.11108	5.9425	8.985	DOWN	uncharacterized protein LOC111039736
Cluster-26641.16126	4.095	1.1425	UP	uncharacterized protein LOC111029998 isoform X1
Cluster-26641.16125	8.9125	1.0725	UP	uncharacterized transporter YwbF-like isoform X1
Cluster-26641.21862	1.13	3.1075	DOWN	hypothetical protein QR98_0056810
Cluster-3777.0	0	0.255	DOWN	protein suppressor of hairy wing isoform X1
Cluster-26641.6976	0.625	0.815	DOWN	uncharacterized protein LOC111028544
Cluster-26641.3166	0.035	0.45	DOWN	charged multivesicular body protein 1b
Cluster-26641.13165	21.71	41.425	DOWN	Cell wall-associated hydrolase
Cluster-26641.2419	8.265	10.33	DOWN	glucose dehydrogenase
Cluster-26641.1416	0.0075	0.235	DOWN	uncharacterized protein LOC105222420 isoform X4
Cluster-26641.1415	0	0.1725	DOWN	uncharacterized protein LOC105222420 isoform X3
Cluster-26641.15808	7.65	11.4925	DOWN	histone H1A, sperm-like
Cluster-26641.13252	46.81	75.6125	DOWN	27 kDa hemolymph protein-like
Cluster-26641.6488	2.0925	3.205	DOWN	uncharacterized protein LOC111039454 isoform X1
Cluster-26641.13925	103.698	22.64	UP	aspartate aminotransferase, cytoplasmic
Cluster-26641.8884	7.1	1.53	UP	hypothetical protein SINV_01211, partial
Cluster-26641.17129	0.9775	1.3875	DOWN	tyrosine 3-monooxygenase
Cluster-26641.14321	244.515	7.325	UP	uncharacterized protein LOC111036037
Cluster-23973.1	0.24	0.7025	DOWN	uncharacterized protein LOC106636701
Cluster-26641.25947	2.555	3.8125	DOWN	uncharacterized protein LOC105396921
Cluster-8264.0	0	1.155	DOWN	adenine phosphoribosyltransferase
Cluster-26641.12649	56.6775	9.12	UP	carbonyl reductase
Cluster-26641.12640	1.9375	0.5625	UP	40S ribosomal protein S19
Cluster-26641.20387	5.495	6.97	DOWN	tachykinin-like peptides receptor 86C isoform X2
Cluster-16106.0	0.005	0.625	DOWN	protein piwi
Cluster-26641.5186	0.52	1.2875	DOWN	uncharacterized protein LOC111031390
Cluster-26641.6357	4.475	5.83	DOWN	tektin-B1-like
Cluster-26641.24392	0.505	0.915	DOWN	protein translocase subunit SecY-like
Cluster-26641.14545	158.55	45.205	UP	tetra-peptide repeat homeobox protein 1-like
Cluster-24980.0	0.4175	0	UP	protein PF14_0175
Cluster-26641.4240	4.545	1.1825	UP	antitrypsin-like
Cluster-26641.8228	19.135	2.8225	UP	uncharacterized protein LOC111039605
Cluster-26641.8227	39.2425	3.95	UP	uncharacterized protein LOC111034122
Cluster-26980.0	0.265	0.7975	DOWN	rplM
Cluster-26641.1064	0.005	0.1525	DOWN	trithorax group protein osa isoform X1
Cluster-26641.6656	1.8125	0.445	UP	uncharacterized protein LOC100165223 isoform X3
Cluster-26641.9783	2.735	0.32	UP	uncharacterized protein LOC111026367
Cluster-26641.1381	0.0025	0.155	DOWN	uncharacterized protein LOC105228924
Cluster-8669.0	0	0.13	DOWN	attractin-like protein 1
Cluster-9697.0	0	0.1275	DOWN	helicase SKI2W
Cluster-5135.1	0	0.285	DOWN	mitogen-activated protein kinase kinase kinase 4 isoform X1
Cluster-39553.0	0.1375	0.395	DOWN	uncharacterized protein LOC103309046
Cluster-26641.21273	1.1625	1.7	DOWN	lexA
Cluster-26641.7728	9.455	2.915	UP	meiosis regulator and mRNA stability factor 1 isoform X1
Cluster-26641.20636	5.98	1.4	UP	POU domain protein 2
Cluster-26641.6096	0.445	1.0425	DOWN	hypothetical protein D910_00694, partial
Cluster-26641.6090	0.52	0.715	DOWN	dynein beta chain, ciliary-like
Cluster-26641.5012	6.93	13.7825	DOWN	nucleolar MIF4G domain-containing protein 1 homolog
Cluster-26641.16323	2.4675	0.7525	UP	CD63 antigen-like
Cluster-26641.9338	1.31	0.375	UP	protein enhancer of sevenless 2B
Cluster-30493.0	0.025	0.615	DOWN	DNA repair protein complementing XP-A cells homolog
Cluster-41027.0	0.02	0.505	DOWN	39S ribosomal protein L2, mitochondrial
Cluster-26641.18865	3.6675	5.0825	DOWN	fibroblast growth factor receptor 4-like
Cluster-26641.10054	0.86	2.115	DOWN	facilitated trehalose transporter Tret1-2 homolog
Cluster-26641.10056	0.7	1.2875	DOWN	facilitated trehalose transporter Tret1-2 homolog isoform X1
Cluster-26641.2567	0.25	2.3625	DOWN	ADP-ribosylation factor 1
Cluster-23774.0	1.0525	1.4175	DOWN	cylicin-2-like
Cluster-26641.25511	0.9475	2.31	DOWN	ubiquitin-conjugating enzyme E2-17 kDa
Cluster-26641.25518	0	0.215	DOWN	chromatin modification-related protein EAF1
Cluster-26641.13763	18.1875	30.9625	DOWN	uncharacterized protein LOC111043013
Cluster-26641.16043	2.6325	0.605	UP	RNA-directed DNA polymerase from mobile element jockey-like
Cluster-26641.16047	1.1525	0.285	UP	protein peanut-like, partial
Cluster-26641.13490	91.3725	242.41	DOWN	cytochrome c oxidase subunit VIIc
Cluster-26641.13499	65.5875	14.405	UP	collagen alpha-2..IV.. chain
Cluster-35424.0	0.0675	1.3675	DOWN	methionine aminopeptidase 2 isoform X2
Cluster-27302.0	0.155	1.63	DOWN	NADH dehydrogenase
Cluster-26641.11576	1.45	2.3675	DOWN	uncharacterized protein LOC111035239
Cluster-28334.0	0.0075	0.4525	DOWN	pre-mRNA-splicing factor Slu7
Cluster-14296.0	0.005	0.3575	DOWN	armadillo repeat-containing protein 8 isoform X1
Cluster-26641.5517	42.4375	8.92	UP	chemosensory protein 8
Cluster-13908.1	0.0275	0.79	DOWN	MRG..MORF4L-binding protein
Cluster-41072.0	0.0125	0.335	DOWN	uncharacterized protein LOC105230609
Cluster-7706.0	0	0.1975	DOWN	origin recognition complex subunit 3
Cluster-26641.3198	8.8325	16.0725	DOWN	E3 ubiquitin-protein ligase RBBP6 isoform X1
Cluster-26641.8514	12.6975	15.875	DOWN	uncharacterized protein LOC107162875 isoform X1
Cluster-27825.0	0.025	0.3825	DOWN	CCAAT..enhancer-binding protein zeta
Cluster-14638.0	0.0175	0.33	DOWN	uncharacterized protein LOC105224774
Cluster-26641.10934	6.055	8.165	DOWN	uncharacterized protein LOC111038054
Cluster-26641.13032	12.0325	2.075	UP	beta-galactosidase
Cluster-26641.25904	0.3475	0.7025	DOWN	uncharacterized protein LOC100575279
Cluster-26641.6824	6.6125	8.985	DOWN	lipid storage droplets surface-binding protein
Cluster-26641.7169	0.665	1.0225	DOWN	tetratricopeptide repeat protein 12-like isoform X2
Cluster-26641.15419	744.593	138.385	UP	fatty acid synthase-like
Cluster-26641.8897	1.9775	0.5375	UP	actin-related protein 2..3 complex subunit 5-like protein
Cluster-26641.13513	8.575	11.85	DOWN	pyruvate dehydrogenase ..acetyl-transferring.. kinase, mitochondrial
Cluster-23758.0	0.13	0.98	DOWN	uncharacterized protein LOC100568976
Cluster-26641.21550	0.3625	0.575	DOWN	WD repeat-containing protein 34
Cluster-26641.13732	118.92	223.988	DOWN	hypothetical protein WR25_02561
Cluster-26641.2648	3.69	1.15	UP	THAP domain-containing protein 1-like
Cluster-26641.9289	16.82	21.3475	DOWN	lipopolysaccharide-induced tumor necrosis factor-alpha factor homolog
Cluster-4350.1	0	0.23	DOWN	WD repeat-containing protein 20 isoform X2
Cluster-35324.0	0.0375	0.555	DOWN	E3 ubiquitin-protein ligase CHIP isoform X1
Cluster-23661.0	0.475	1.2075	DOWN	rpmB
Cluster-26641.1890	0.67	0.9825	DOWN	uncharacterized protein LOC111679920
Cluster-26641.5366	1.855	3.365	DOWN	prominin-1-A-like
Cluster-26641.7216	0.4275	0.885	DOWN	uncharacterized protein YhdP-like
Cluster-8547.0	0	0.2325	DOWN	serum response factor homolog isoform X1
Cluster-26641.9072	1.39	0.2575	UP	gamma-aminobutyric acid receptor subunit beta-like isoform X2
Cluster-26641.9077	0.66	6.9875	DOWN	uncharacterized protein LOC100570906
Cluster-26641.13883	22.3525	30.125	DOWN	uncharacterized protein LOC111029507
Cluster-26641.23103	3.04	0.3125	UP	endoplasmic reticulum aminopeptidase 1-like, partial
Cluster-38860.0	0.0475	0.6925	DOWN	methionine aminopeptidase 1
Cluster-26641.2655	1.4875	4.0525	DOWN	uncharacterized protein LOC100163486
Cluster-26641.21599	5.6875	8.9575	DOWN	dopamine N-acetyltransferase-like
Cluster-26641.14742	1.5575	1.9625	DOWN	serine..threonine-protein kinase 32A, partial
Cluster-27622.0	1.83	0.375	UP	Down syndrome cell adhesion molecule-like protein Dscam2 isoform X33
Cluster-26641.13061	180.4	266.495	DOWN	ATP synthase F0 subunit 6 ..mitochondrion..
Cluster-26641.18311	7.8025	2.1175	UP	uncharacterized protein LOC111329857
Cluster-26641.25869	0	0.1725	DOWN	LOW QUALITY PROTEIN: S phase cyclin A-associated protein in the endoplasmic reticulum
Cluster-26641.25136	0.015	0.2225	DOWN	chromodomain-helicase-DNA-binding protein 1
Cluster-26641.12079	321.745	601.55	DOWN	hypothetical protein CRE_03576
Cluster-26641.20501	2.075	3.7625	DOWN	chaoptin isoform X1
Cluster-26641.20502	3.43	6.58	DOWN	uncharacterized protein LOC111035727 isoform X1
Cluster-19139.0	0.015	0.4075	DOWN	penicillin amidase
Cluster-14521.0	0.005	0.38	DOWN	uncharacterized protein LOC105232712
Cluster-9326.0	0	0.175	DOWN	uncharacterized protein LOC105233358
Cluster-26641.9405	16.9775	24.8	DOWN	frequenin-1
Cluster-26641.10644	157.278	9.455	UP	legumain
Cluster-37555.0	0.0125	0.1675	DOWN	kinase D-interacting substrate of 220 kDa isoform X2
Cluster-29340.0	0.1425	2.595	DOWN	small nuclear ribonucleoprotein Sm D3
Cluster-26641.5535	2.3525	3.54	DOWN	ATP-binding cassette sub-family C member Sur-like
Cluster-16054.0	0.005	0.305	DOWN	methyltransferase-like protein 13 isoform X1
Cluster-26641.14999	33.23	49.245	DOWN	adhesive plaque matrix protein-like
Cluster-26641.14996	35.73	1.0875	UP	uncharacterized protein LOC111032939
Cluster-26641.15028	6.3	1.8275	UP	prestin isoform X4
Cluster-26641.8179	15.5775	19.9	DOWN	allatostatin C-like
Cluster-26641.18335	17.5125	5	UP	metal-response element-binding transcription factor 2
Cluster-15931.0	0.05	0.79	DOWN	hypothetical protein
Cluster-26641.21928	5.9525	1.81	UP	putative glucose-6-phosphate 1-epimerase
Cluster-26641.12456	0.965	2.1725	DOWN	carotenoid isomerooxygenase isoform X1
Cluster-26641.14039	126.81	36.59	UP	glutathione S-transferase-like protein
Cluster-26641.14033	28.8625	37.455	DOWN	alpha-tocopherol transfer protein-like
Cluster-26641.14031	1428.22	59.82	UP	uncharacterized protein LOC111036037
Cluster-26641.11207	81.88	25.365	UP	proline and serine-rich protein 1-like
Cluster-41247.0	0.01	0.44	DOWN	serine..threonine-protein phosphatase Pgam5, mitochondrial isoform X2
Cluster-26641.18479	6.65	11.075	DOWN	uncharacterized protein LOC111028121
Cluster-26641.13412	5.6275	1.23	UP	pancreatic lipase-related protein 2-like
Cluster-39263.0	0.9925	0.1925	UP	actin-like protein 6A
Cluster-26641.11483	11.53	17.29	DOWN	LOW QUALITY PROTEIN: lysophosphatidylcholine acyltransferase
Cluster-26641.16205	1.115	2.4175	DOWN	gustatory and odorant receptor 22-like
Cluster-26641.4812	0	2.1425	DOWN	uncharacterized protein LOC100573825
Cluster-26641.15940	6.8975	1.65	UP	DNA N6-methyl adenine demethylase
Cluster-26641.5703	2.6275	13.73	DOWN	ninjurin-1-like isoform X1
Cluster-26641.19434	3.0125	0.5275	UP	uncharacterized protein LOC111040551
Cluster-26641.6627	2.885	0.2575	UP	glyoxylate reductase..hydroxypyruvate reductase
Cluster-26641.7638	12.255	31.4025	DOWN	cytochrome P450 18A1
Cluster-26641.7639	30.3225	83.735	DOWN	cytochrome P450 18a1-like
Cluster-176.1	0.005	0.1725	DOWN	uncharacterized protein LOC105228183
Cluster-26641.9144	26.94	5.1975	UP	fatty acid synthase-like, partial
Cluster-26641.1773	0.5875	0.7475	DOWN	uncharacterized protein LOC111034573
Cluster-26641.24634	0.3625	0.685	DOWN	protease Do-like 1, chloroplastic
Cluster-26641.643	0.585	0.975	DOWN	rluC
Cluster-26641.21883	0.77	1.21	DOWN	uncharacterized protein LOC103308489
Cluster-26641.156	0.04	0.5975	DOWN	ATP-binding cassette transporter F subfamily member 3
Cluster-26641.20823	8.2425	48.85	DOWN	alpha-tocopherol transfer protein-like
Cluster-8796.0	0	0.965	DOWN	uncharacterized protein LOC111029296
Cluster-34015.0	0.055	0.815	DOWN	akirin
Cluster-19886.0	0.325	4.185	DOWN	ribosomal protein L35e-like
Cluster-30240.0	0.2225	0.6125	DOWN	Helicase C and DEAD domain containing protein
Cluster-29534.0	0.02	0.2325	DOWN	ettA
Cluster-26641.5874	17.6775	41.475	DOWN	Uncharacterized protein APZ42_003968
Cluster-26641.17459	16.96	80.09	DOWN	uncharacterized protein LOC100573379 isoform X2
Cluster-40537.0	0.055	0.9275	DOWN	glycerol-3-phosphate acyltransferase 3 isoform X2
Cluster-26641.1743	0.005	0.39	DOWN	catenin delta-2
Cluster-26641.16834	14.8225	21.43	DOWN	3-ketoacyl-CoA thiolase, mitochondrial
Cluster-26641.10291	26.6075	6.8075	UP	uncharacterized protein LOC100159152 isoform X1
Cluster-26641.10297	19.0275	25.08	DOWN	leucine-rich repeats and immunoglobulin-like domains protein 1
Cluster-15781.0	0.0025	0.21	DOWN	hypothetical protein ZHAS_00019903
Cluster-26641.10128	0.6	0.1425	UP	Down syndrome cell adhesion molecule-like protein Dscam2 isoform X15
Cluster-35244.0	0.0175	0.22	DOWN	cell division cycle 7-related protein kinase
Cluster-26641.15513	22.725	4.58	UP	uncharacterized protein LOC111028031
Cluster-26641.15518	214.795	35.185	UP	calphotin-like
Cluster-26641.8993	11.7275	3.1575	UP	zinc finger protein 1-like isoform X1
Cluster-26641.12387	1.5575	3.9575	DOWN	alpha-tocopherol transfer protein-like
Cluster-26641.12389	146.685	35.5625	UP	calreticulin
Cluster-26641.18608	1.8025	2.52	DOWN	UDP-glucuronosyl transferase 344M2
Cluster-26641.10108	2.1925	0.4975	UP	lanC-like protein 2
Cluster-8381.1	0.4025	1.3775	DOWN	sensory neuron membrane protein 1 isoform X1
Cluster-30318.0	2.0275	4.9375	DOWN	androgen-induced gene 1 protein-like
Cluster-5924.0	0	0.36	DOWN	uncharacterized protein LOC106618548
Cluster-7708.1	0.2425	2.045	DOWN	NADH dehydrogenase
Cluster-26641.8464	0.47	0.0225	UP	muscarinic acetylcholine receptor DM1
Cluster-26641.14910	39.7475	50.0125	DOWN	ubiquitin-protein ligase E3A-like isoform X2
Cluster-26641.2757	1.395	3.015	DOWN	bombyxin B-8-like
Cluster-26641.13146	37.4625	55.515	DOWN	MICOS complex subunit mic60-like
Cluster-26641.13145	74.795	131.077	DOWN	MICOS complex subunit mic60-like
Cluster-26641.1222	0.0275	0.615	DOWN	pre-mRNA-splicing factor 38B isoform X1
Cluster-26641.16669	4.6475	6.015	DOWN	uncharacterized protein LOC111028079
Cluster-26641.16660	6.1575	29.57	DOWN	nose resistant to fluoxetine protein 6-like
Cluster-26641.17395	4.2225	1.1275	UP	Down syndrome cell adhesion molecule-like protein Dscam2 isoform X9
Cluster-26516.0	0.1	1.565	DOWN	26S proteasome regulatory subunit 4 isoform X2
Cluster-26641.20471	15.7825	21.07	DOWN	uncharacterized protein LOC111027904
Cluster-26641.964	0.015	0.5425	DOWN	signal recognition particle receptor subunit alpha homolog
Cluster-26641.17531	7.345	1.055	UP	UDP-glucuronosyltransferase 2B2
Cluster-26641.17535	4.0575	0.3075	UP	UDP-glucuronosyltransferase 2B13
Cluster-32006.0	0.085	1.355	DOWN	eukaryotic translation initiation factor 3 subunit J
Cluster-26641.9476	1.73	0.3675	UP	probable multidrug resistance-associated protein lethal..2..03659
Cluster-26641.9479	0.8775	0.135	UP	uncharacterized protein LOC111038580
Cluster-25257.0	0.015	0.4575	DOWN	tRNA-splicing ligase RtcB homolog
Cluster-13318.0	0	0.295	DOWN	dnaJ homolog subfamily C member 16
Cluster-26641.19365	16.6625	3.215	UP	testis-specific gene A8 protein-like
Cluster-14243.0	0.0075	0.215	DOWN	zinc finger protein 91 isoform X1
Cluster-26641.11826	7.3425	13.78	DOWN	annulin-like isoform X1
Cluster-26641.11829	2.23	0.68	UP	uncharacterized protein LOC103308399
Cluster-26641.559	1.4975	2.5325	DOWN	hypothetical protein D910_00242
Cluster-26641.12733	9.4675	14.31	DOWN	tigger transposable element-derived protein 4-like
Cluster-26641.21799	2.675	0.785	UP	alpha-1,3-mannosyl-glycoprotein 4-beta-N-acetylglucosaminyltransferase B
Cluster-26641.3562	3.3975	0.985	UP	leucine-rich repeat-containing protein 69-like
Cluster-26641.13993	940.375	106.738	UP	esterase E4
Cluster-26641.25351	0.015	0.205	DOWN	disheveled-associated activator of morphogenesis 1
Cluster-26641.436	0.44	1.01	DOWN	uncharacterized protein LOC107169600 isoform X1
Cluster-15725.0	0.0275	1.0375	DOWN	pre-rRNA-processing protein TSR2 homolog
Cluster-32291.0	0.0175	0.32	DOWN	translocation protein SEC63 homolog
Cluster-26641.10422	45.1375	10.9025	UP	multidrug resistance protein 1B-like isoform X3
Cluster-34483.0	0.0275	0.37	DOWN	nuoG
Cluster-26641.4781	0.015	0.41	DOWN	solute carrier family 25 member 40
Cluster-26641.1441	0.0125	0.3875	DOWN	SURP and G-patch domain-containing protein 1 isoform X1
Cluster-26641.6492	0.7625	1.3175	DOWN	LOW QUALITY PROTEIN: uncharacterized protein LOC111616963
Cluster-26641.15676	11.775	36.5375	DOWN	hsp70-1
Cluster-26641.14896	14.8125	2.93	UP	fragile X mental retardation syndrome-related protein 1 isoform X1
Cluster-26641.14898	40.38	10.2225	UP	synaptic functional regulator FMR1 isoform X3
Cluster-26641.11594	41.235	61.61	DOWN	uncharacterized protein LOC111035390 isoform X1
Cluster-26641.12138	14.315	3.8375	UP	nidogen-1
Cluster-26641.9534	1.4725	4.2425	DOWN	unnamed protein product
Cluster-16792.0	0.0025	0.2575	DOWN	retinoblastoma family protein isoform X1
Cluster-34389.0	0.0225	0.6675	DOWN	methionine-R-sulfoxide reductase B1 isoform X3
Cluster-26641.9880	6.455	13.1325	DOWN	mucin-2-like
Cluster-26641.9883	1.155	1.63	DOWN	cuticle protein 19-like isoform X2
Cluster-26641.14664	58.2925	13.245	UP	esterase E4-like isoform X2
Cluster-26641.25914	0.0125	0.3125	DOWN	uncharacterized protein LOC100159613
Cluster-13541.0	0.0075	0.3025	DOWN	acyl-coenzyme A thioesterase 9, mitochondrial-like
Cluster-23937.0	0.6925	1.285	DOWN	uncharacterized protein LOC103312014
Cluster-26641.12679	90.1475	193.495	DOWN	hypothetical protein IscW_ISCW024385, partial
Cluster-28499.0	0.015	0.425	DOWN	cysteine-rich with EGF-like domain protein 2 isoform X1
Cluster-26641.2991	1.04	0.275	UP	uncharacterized protein LOC103311982
Cluster-25073.0	0.005	0.235	DOWN	ATP-dependent RNA helicase DDX24
Cluster-19403.0	0.1075	1.5375	DOWN	ACYPI005249
Cluster-26641.17745	5.1775	0.825	UP	uncharacterized protein LOC100163338
Cluster-26641.17746	2.285	0.355	UP	uncharacterized protein LOC100163338
Cluster-26641.10211	0.1375	0.5725	DOWN	titin, partial
Cluster-26641.10217	34.7175	47.2225	DOWN	hydroxysteroid dehydrogenase-like protein 2
Cluster-26641.5621	8.85	12.5625	DOWN	NAD-dependent protein deacylase Sirt4 isoform X1
Cluster-26641.5623	11.9375	106.468	DOWN	inositol oxygenase
Cluster-26641.5624	15.9625	34.3075	DOWN	lipase 3 isoform X1
Cluster-26641.9927	3.0675	8.105	DOWN	membrane-associated guanylate kinase, WW and PDZ domain-containing protein 3-like
Cluster-26641.14464	11.735	19.54	DOWN	protein obstructor-E-like
Cluster-26641.15331	139.322	220.822	DOWN	hypothetical protein CLF_113308
Cluster-26641.15334	14.955	29.2775	DOWN	hypothetical protein IscW_ISCW024385, partial
Cluster-26641.720	1.4225	0.29	UP	uncharacterized protein LOC111037741
Cluster-26641.13658	29.9975	42.58	DOWN	protein phosphatase 1 regulatory subunit 3C-B-like isoform X1
Cluster-26641.13659	61.3575	15.85	UP	craniofacial development protein 2-like
Cluster-26641.16179	34.8925	9.1525	UP	cystathionine beta-synthase
Cluster-20575.0	0.0775	1.125	DOWN	putative per-hexamer repeat protein 5-like
Cluster-34110.0	0.015	0.445	DOWN	hydroxysteroid dehydrogenase-like protein 2
Cluster-26641.4699	0.035	0.365	DOWN	protein preli-like
Cluster-26641.19049	1.3125	1.95	DOWN	uncharacterized protein LOC111026746
Cluster-26641.605	0.645	2.04	DOWN	flocculation protein FLO11-like
Cluster-28384.0	0.0075	0.41	DOWN	FACT complex subunit Ssrp1
Cluster-23336.0	0.2075	2.53	DOWN	FUN14 domain-containing protein 1 isoform X1
Cluster-26641.11514	5.4175	6.855	DOWN	atrial natriuretic peptide receptor 1 isoform X1
Cluster-26683.0	0.04	0.47	DOWN	mannose-6-phosphate isomerase
Cluster-34539.0	0.015	0.28	DOWN	U2 snRNP-associated SURP motif-containing protein
Cluster-37811.0	0.0175	0.98	DOWN	uncharacterized protein LOC108975557
Cluster-33405.0	1.2275	1.7275	DOWN	uncharacterized protein LOC103311885
Cluster-26641.5429	4.7175	0.8225	UP	homeobox protein Hox-A4-like
Cluster-38008.0	0.015	0.2975	DOWN	uncharacterized protein LOC111686742
Cluster-26641.5048	0.3025	12.9175	DOWN	uncharacterized protein LOC111040040
Cluster-26641.16373	3.155	0.915	UP	hyaluronan mediated motility receptor
Cluster-26641.16370	19.98	33.5325	DOWN	carboxypeptidase E-like
Cluster-26641.20672	22.12	28.3175	DOWN	uncharacterized protein LOC103310518
Cluster-26641.11905	11.685	18.7825	DOWN	uncharacterized protein LOC107161910
Cluster-26641.11901	27.74	3.45	UP	inactive pancreatic lipase-related protein 1-like isoform X1
Cluster-26641.25455	0	0.185	DOWN	LOW QUALITY PROTEIN: uncharacterized protein LOC105223555
Cluster-1094.1	0.0025	0.1675	DOWN	flocculation protein FLO11
Cluster-26641.10000	13.08	3.055	UP	ecdysone-induced protein 78C isoform X2
Cluster-4617.2	0	0.23	DOWN	histone-lysine N-methyltransferase 2C
Cluster-26641.13724	9.8675	25.5675	DOWN	E3 ubiquitin-protein ligase TRIM23-like
Cluster-8316.0	0	0.23	DOWN	uncharacterized protein LOC105223878
Cluster-41222.0	0.12	1.6075	DOWN	eukaryotic translation initiation factor 3 subunit E
Cluster-26641.13751	103.485	32.0875	UP	profilin-like
Cluster-26641.13756	8.2525	11.385	DOWN	LOW QUALITY PROTEIN: arginine kinase
Cluster-36898.0	0.0525	0.7575	DOWN	26S proteasome non-ATPase regulatory subunit 11
Cluster-13891.0	0.01	0.3525	DOWN	dnaJ homolog subfamily C member 25 homolog
Cluster-26641.8890	13.1375	36.2225	DOWN	soluble trehalase
Cluster-14252.0	0.0075	0.255	DOWN	probable peroxisomal membrane protein PEX13
Cluster-7619.0	0	0.2375	DOWN	protein Exd1 homolog
Cluster-26641.11008	5.5575	1.41	UP	probable nuclear hormone receptor HR3 isoform X3
Cluster-26641.13480	404.26	43.8625	UP	uncharacterized protein LOC111037974
Cluster-26641.5479	0.0575	1.4925	DOWN	nucleolar protein 56
Cluster-26641.5473	0.4125	0.78	DOWN	HATPase c and DNA gyraseB C and DNA gyraseB and T oprim domain containing protein
Cluster-29884.2	0.0025	0.1525	DOWN	uncharacterized protein LOC106615086 isoform X3
Cluster-26641.8546	40.925	8.98	UP	uncharacterized protein LOC100166015 isoform X1
Cluster-26641.9715	62.88	83.3025	DOWN	uncharacterized protein LOC111028100
Cluster-26641.13950	1813.22	296.09	UP	ACYPI000036
Cluster-34475.0	0.01	0.2225	DOWN	DNA polymerase theta isoform X1
Cluster-26641.23592	0.7775	1.6325	DOWN	calreticulin-like
Cluster-28294.0	0.0325	0.845	DOWN	pinin-like
Cluster-28114.0	0.0775	2.7725	DOWN	probable prefoldin subunit 5
Cluster-26641.4062	0.85	1.49	DOWN	uncharacterized protein LOC107882305
Cluster-15752.0	0	0.135	DOWN	WD repeat-containing protein CG11141
Cluster-26641.7246	10.8275	14.3825	DOWN	ACYPI001868
Cluster-26641.6597	8.4775	1.3525	UP	leukocyte elastase inhibitor
Cluster-26641.6626	15.805	3.8525	UP	alpha-tubulin N-acetyltransferase 1-like isoform X2
Cluster-26641.6628	70.895	13.465	UP	glyoxylate reductase..hydroxypyruvate reductase
Cluster-26641.11754	10.185	3.1325	UP	protein 60A
Cluster-17251.0	0.005	0.3625	DOWN	branchpoint-bridging protein isoform X1
Cluster-26641.12925	1.135	0.185	UP	LOW QUALITY PROTEIN: 60S ribosomal protein L4-like
Cluster-26641.813	0.08	1.695	DOWN	protein CTLA-2-beta
Cluster-36521.0	0.0125	0.3025	DOWN	protein clueless
Cluster-8761.0	0	0.225	DOWN	leukocyte elastase inhibitor
Cluster-26052.0	0.04	0.7075	DOWN	calcium-binding mitochondrial carrier protein Aralar1 isoform X1
Cluster-26641.19293	2.79	3.8275	DOWN	uncharacterized protein LOC100571126 isoform X2
Cluster-26641.15672	188.112	55.3425	UP	chromobox protein homolog 3
Cluster-26641.19747	5.6425	1.2875	UP	transcription factor collier
Cluster-26641.11243	6.605	13.9175	DOWN	unnamed protein product, partial
Cluster-26641.21222	7.53	9.675	DOWN	uncharacterized protein LOC100167585 isoform X2
Cluster-26641.12023	14.035	4.07	UP	M-phase inducer phosphatase 3
Cluster-26641.21489	3.55	4.5825	DOWN	facilitated trehalose transporter Tret1 isoform X2
Cluster-26641.5196	5.26	8.3975	DOWN	matrix metalloproteinase-2-like
Cluster-26641.5198	1.185	7.975	DOWN	plexin-A4-like
Cluster-39868.0	0.0025	0.14	DOWN	probable serine..threonine-protein kinase DDB_G0282963 isoform X2
Cluster-32510.0	0.0075	0.3925	DOWN	cysteine--tRNA ligase, cytoplasmic
Cluster-26641.13004	82.775	4.6725	UP	uncharacterized protein LOC111042261 isoform X1
Cluster-38499.0	17.995	4.59	UP	UPF0553 protein v1g230591
Cluster-26641.17020	0.825	1.2875	DOWN	uncharacterized protein LOC111038442
Cluster-26641.6816	4.155	89.0575	DOWN	phosphate carrier protein, mitochondrial-like
Cluster-7293.0	0	0.1775	DOWN	ribosome biogenesis protein BOP1 homolog
Cluster-26641.5547	21.925	45.7175	DOWN	GILT-like protein 1
Cluster-26641.2002	0.155	4.5	DOWN	V-type proton ATPase subunit F 1
Cluster-26641.10082	0.72	0.0175	UP	uncharacterized protein LOC111040078
Cluster-26641.14703	2.6275	3.3975	DOWN	probable pyruvate dehydrogenase E1 component subunit alpha, mitochondrial
Cluster-26641.9786	8.94	12.5825	DOWN	uncharacterized protein LOC100159331 isoform X4
Cluster-26641.11419	6.25	10.0975	DOWN	uncharacterized protein LOC111035643
Cluster-26641.1065	0.0075	0.3325	DOWN	zinc finger protein 62 homolog
Cluster-26641.1062	0.04	0.9025	DOWN	cytoplasmic tRNA 2-thiolation protein 1 isoform X1
Cluster-26641.1490	0.0375	0.3975	DOWN	ring canal kelch protein isoform X1
Cluster-26641.11753	0.8	1.3875	DOWN	clpB
Cluster-26641.12223	17.57	28.29	DOWN	serine..threonine-protein kinase pelle-like isoform X1
Cluster-26641.742	0.3175	1.155	DOWN	undecaprenyl phosphate-alpha-l-ara4fn deformylase
Cluster-35427.0	0.03	0.585	DOWN	bifunctional lysine-specific demethylase and histidyl-hydroxylase NO66
Cluster-31315.0	0.3175	0	UP	cytochrome P450 4C1-like
Cluster-26641.14603	41.325	12.1275	UP	brain tumor protein
Cluster-18216.0	0.035	0.6375	DOWN	odorant-binding protein 1 isoform X1
Cluster-26641.14062	0.14	1.575	DOWN	heat shock protein 70 A1-like
Cluster-26641.11255	9.4525	2.4475	UP	uncharacterized protein LOC107170869 isoform X1
Cluster-26641.25601	0.97	0.0875	UP	uncharacterized protein LOC111029632
Cluster-26641.25602	3.425	1.0175	UP	uncharacterized protein LOC100165925
Cluster-8118.0	0	0.31	DOWN	tRNA ..adenine..37..-N6..-methyltransferase
Cluster-29182.0	0.015	0.6725	DOWN	nesprin-1-like
Cluster-36279.0	0.0475	0.31	DOWN	ubiquinone biosynthesis monooxygenase COQ6-like
Cluster-26641.7542	9.1275	13.815	DOWN	protein quiver-like
Cluster-26959.0	0.0075	0.1175	DOWN	LOW QUALITY PROTEIN: la-related protein 1
Cluster-26641.16231	13.2375	3.55	UP	protocadherin-like wing polarity protein stan isoform X1
Cluster-32631.0	0.045	2.265	DOWN	probable prefoldin subunit 6
Cluster-26641.9878	0.65	15.14	DOWN	cytochrome P450 4CJ1
Cluster-26641.6994	1.9175	0.535	UP	fatty acyl-CoA reductase 1
Cluster-26641.6998	2.13	2.81	DOWN	proton-associated sugar transporter A-like
Cluster-28945.0	0.225	1.94	DOWN	renin receptor
Cluster-7932.0	0	0.5025	DOWN	uncharacterized protein LOC108969423
Cluster-24215.0	0.03	1.05	DOWN	uncharacterized protein LOC103311734
Cluster-26641.2219	0.135	0.55	DOWN	uncharacterized protein LOC103311982
Cluster-26641.11495	8.1275	14.6325	DOWN	histone H2B-like isoform X2
Cluster-26641.11493	13.235	2.68	UP	UDP-glucuronosyl transferase 341A4
Cluster-26641.11491	16.1325	2.245	UP	DNA N6-methyl adenine demethylase
Cluster-26641.14515	203.748	280.01	DOWN	UNKNOWN
Cluster-26641.16915	1.2275	7.685	DOWN	adenylosuccinate synthetase-like
Cluster-28528.0	0.0175	0.2275	DOWN	tyrosine-protein phosphatase non-receptor type 23
Cluster-35117.5	0.08	0.31	DOWN	rpoB
Cluster-35117.4	0.1225	0.38	DOWN	rpoB
Cluster-14880.0	0.005	0.305	DOWN	actin-related protein 8
Cluster-26641.6657	2.375	3	DOWN	uncharacterized protein LOC111033741
Cluster-26641.3879	0.1525	2.2825	DOWN	ribosomal protein S30-like isoform X1
Cluster-22666.0	0	0.28	DOWN	activating signal cointegrator 1 complex subunit 2
Cluster-26641.4805	2.225	10.8075	DOWN	uncharacterized protein LOC111026427
Cluster-26641.15952	2.5275	4.655	DOWN	keratin, type I cytoskeletal 9
Cluster-26641.1354	0.005	0.175	DOWN	CLK4-associating serine..arginine rich protein
Cluster-26641.1356	0.1175	1.4525	DOWN	V-type proton ATPase 21 kDa proteolipid subunit
Cluster-26641.1351	0.03	0.4875	DOWN	neutral alpha-glucosidase AB
Cluster-26766.0	0.015	0.255	DOWN	DNA mismatch repair protein Mlh1
Cluster-26641.16798	2.085	0.31	UP	UDP-glucuronosyl transferase 344B4
Cluster-26641.16792	11.59	3.315	UP	la-related protein 1 isoform X3
Cluster-26641.1972	2.8625	0.8675	UP	leucine-rich repeat-containing protein 24-like
Cluster-26641.14239	104.208	12.815	UP	ACYPI005249
Cluster-26641.19218	3.8975	12.7575	DOWN	E3 ubiquitin-protein ligase Arkadia-like isoform X1
Cluster-26641.14494	11.1475	2.71	UP	alpha-aminoadipic semialdehyde synthase, mitochondrial
Cluster-26641.11045	13.2825	17.6	DOWN	TEH4
Cluster-26641.795	0.005	0.22	DOWN	adenosine 3'-phospho 5'-phosphosulfate transporter 1
Cluster-26641.16898	57.185	16.555	UP	nidogen-2
Cluster-26641.12531	8.28	14.72	DOWN	histone-lysine N-methyltransferase, H3 lysine-79 specific-like
Cluster-26641.18678	1.315	0.24	UP	synaptic vesicle membrane protein VAT-1 homolog-like
Cluster-26641.25180	0.0325	0.5075	DOWN	serine..arginine-rich splicing factor 4
Cluster-9880.0	161.935	21.6225	UP	ACYPI003547
Cluster-26641.12334	14.7325	3.9275	UP	RING finger protein unkempt isoform X1
Cluster-26641.424	3.1025	0.6675	UP	uncharacterized protein LOC111041360
Cluster-26641.428	0.0125	0.2075	DOWN	E3 ubiquitin-protein ligase UBR3
Cluster-26641.18585	4.3925	1.2375	UP	ribonuclease 3
Cluster-26641.18588	4.2725	1.1525	UP	uncharacterized protein LOC100159131
Cluster-28205.0	0.1725	0.755	DOWN	golgin subfamily A member 4-like
Cluster-26641.20722	27.05	49.6925	DOWN	very long-chain specific acyl-CoA dehydrogenase, mitochondrial
Cluster-26641.23111	7.76	2.4075	UP	GPI mannosyltransferase 2
Cluster-14254.0	0.0025	0.1975	DOWN	YTH domain-containing protein 1
Cluster-3523.1	0.0025	0.1675	DOWN	condensin complex subunit 1
Cluster-26641.6898	6.315	1.77	UP	tyrosine-protein kinase Src64B
Cluster-26641.11117	7.81	2.2025	UP	uncharacterized protein LOC111037915 isoform X1
Cluster-26641.16841	1.3075	3.2475	DOWN	uncharacterized protein LOC111027048
Cluster-26641.16847	15.795	1.285	UP	uncharacterized protein LOC111038225 isoform X2
Cluster-39020.0	0.03	0.4425	DOWN	UDP-glucuronosyltransferase 2B10-like
Cluster-26641.1572	0.01	0.2925	DOWN	nardilysin
Cluster-16142.0	0.0025	0.1575	DOWN	formin-like protein CG32138 isoform X5
Cluster-26641.6709	2.265	5.63	DOWN	doublesex- and mab-3-related transcription factor A2-like
Cluster-26641.6708	3.0725	7.7	DOWN	doublesex- and mab-3-related transcription factor A2-like
Cluster-26641.9708	1.265	0.2475	UP	glutathione S-transferase 1-1-like
Cluster-26641.12860	715.8	66.395	UP	TPA_inf: cathepsin B
Cluster-26641.13171	67.3175	15.81	UP	peroxidase isoform X1
Cluster-26641.16615	6.6525	0.79	UP	ester hydrolase C11orf54-like
Cluster-26641.10616	0.03	1.05	DOWN	ATP synthase subunit beta, mitochondrial
Cluster-7993.0	0	0.2225	DOWN	transducin beta-like protein 3
Cluster-26641.914	0.0025	0.2675	DOWN	uncharacterized protein LOC105233229 isoform X2
Cluster-26641.912	0.0275	0.5425	DOWN	ras-related protein Rab6
Cluster-26641.919	0.005	0.1725	DOWN	uncharacterized protein LOC105225075
Cluster-39242.0	0.0825	1.4375	DOWN	uncharacterized protein LOC108965562
Cluster-26641.13820	107.935	21.6525	UP	uncharacterized family 31 glucosidase KIAA1161-like
Cluster-26641.11009	7.82	11.8525	DOWN	breast carcinoma-amplified sequence 3 homolog isoform X1
Cluster-30073.0	0.015	0.7375	DOWN	FAD-dependent oxidoreductase domain-containing protein 1
Cluster-26641.25681	0.55	1.225	DOWN	ribosomal protein S3, putative
Cluster-26641.25024	0.01	0.4225	DOWN	protein SREK1IP1
Cluster-7452.0	0	0.48	DOWN	ACYPI005168
Cluster-24720.0	0.055	0.85	DOWN	peptidylglycine alpha-hydroxylating monooxygenase
Cluster-26641.10443	1.5425	0.4825	UP	uncharacterized protein LOC111042268
Cluster-9342.0	0	0.2425	DOWN	RING finger protein 141
Cluster-23127.0	0.345	0.875	DOWN	uncharacterized protein LOC111042278
Cluster-26641.17106	10.685	2.13	UP	uncharacterized protein LOC111033601
Cluster-26641.6919	16.0775	4.8275	UP	F-box only protein 28-like
Cluster-26641.3980	11.93	3.2325	UP	pollen-specific leucine-rich repeat extensin-like protein 2
Cluster-15645.0	0.005	0.27	DOWN	LOW QUALITY PROTEIN: serine..threonine-protein kinase PAK 1
Cluster-26641.11417	75.145	8.1325	UP	uncharacterized protein LOC111037974
Cluster-26641.11410	17.02	4.685	UP	B-cell lymphoma..leukemia 11B-like
Cluster-9007.0	0	0.4425	DOWN	dehydrodolichyl diphosphate synthase complex subunit NUS1
Cluster-26641.13804	337.668	635.913	DOWN	putative salivary protein, partial
Cluster-26641.15242	14.245	22.0825	DOWN	androgen-dependent TFPI-regulating protein-like isoform X1
Cluster-26641.8246	0.3775	0.955	DOWN	hypothetical protein C0J52_03288, partial
Cluster-26641.15869	3.5175	1.0625	UP	serine..threonine-protein kinase pakG
Cluster-26641.2937	7.6875	1.2325	UP	lactase-phlorizin hydrolase isoform X1
Cluster-33480.0	0.0125	0.24	DOWN	uncharacterized protein LOC105223879
Cluster-26641.21836	0.005	0.2	DOWN	non-canonical poly..A.. RNA polymerase PAPD5
Cluster-28693.0	0.005	0.2225	DOWN	uncharacterized protein LOC105226814 isoform X1
Cluster-29668.0	0.13	0.91	DOWN	zinc finger protein 26-like
Cluster-26641.9870	13.905	24.345	DOWN	uncharacterized protein LOC100165413
Cluster-26641.11358	14.6675	18.98	DOWN	uncharacterized protein LOC111042988
Cluster-26641.14656	20.7825	29.54	DOWN	sodium channel protein paralytic isoform X32
Cluster-26641.14655	20.6825	26.37	DOWN	autophagy-related protein 9A
Cluster-26641.14654	0.0325	0.5675	DOWN	GH13086
Cluster-26641.18989	20.8125	6.0875	UP	uncharacterized protein LOC111043083 isoform X2
Cluster-26641.18983	5.4375	0.9375	UP	lactase-phlorizin hydrolase
Cluster-26641.21310	1.9775	19.895	DOWN	uncharacterized protein LOC111039503
Cluster-26641.18218	2.4675	3.3175	DOWN	serine protease nudel-like
Cluster-26641.4889	0	0.545	DOWN	RNA polymerase II elongation factor Ell-like
Cluster-26641.5178	0.4675	2.2875	DOWN	uncharacterized protein LOC100569758
Cluster-26641.5174	0	0.1525	DOWN	uncharacterized protein LOC105226424
Cluster-16294.1	0.005	0.2875	DOWN	uncharacterized protein LOC105229848
Cluster-26641.17732	23.1775	5.8775	UP	collagen alpha-1..IV.. chain
Cluster-15680.0	0.01	0.305	DOWN	AP-2 complex subunit alpha
Cluster-26641.4225	0.085	0.44	DOWN	transposase
Cluster-33289.0	0.32	0.7125	DOWN	uncharacterized protein LOC111026344
Cluster-33295.0	0.155	4.775	DOWN	LOW QUALITY PROTEIN: putative phospholipase B-like 2
Cluster-26641.7140	1.5125	8.0175	DOWN	tryptophan 2,3-dioxygenase-like isoform X2
Cluster-26641.6978	18.0325	24.15	DOWN	prothoracicostatic peptide
Cluster-26641.4806	0.82	1.525	DOWN	adenosine kinase-like
Cluster-26641.9329	2.0075	2.7275	DOWN	adenylate cyclase type 2
Cluster-26641.25275	0.01	1.18	DOWN	glycine receptor subunit alpha-4
Cluster-8801.0	0	0.24	DOWN	uncharacterized protein LOC105232587
Cluster-26641.13662	18.9725	5.7175	UP	pollen-specific leucine-rich repeat extensin-like protein 2
Cluster-26641.16108	0.4775	2.705	DOWN	zinc finger BED domain-containing protein 4-like
Cluster-32094.0	0.2575	0.5	DOWN	52 kDa repressor of the inhibitor of the protein kinase-like, partial
Cluster-39182.1	0.24	0.5525	DOWN	atpA
Cluster-25271.0	0.0725	0.3375	DOWN	signal transduction histidine-protein kinase BarA-like
Cluster-26641.16917	2.5825	0.7775	UP	uncharacterized protein LOC100575277 isoform X2
Cluster-26641.25738	1.09	2.475	DOWN	uncharacterized protein LOC111029046
Cluster-26641.14362	1289.59	5965.52	DOWN	hypothetical protein A3Q56_05216, partial
Cluster-7030.0	0	0.195	DOWN	polycomb protein Scm
Cluster-26641.4147	3.5925	4.8625	DOWN	anoctamin-8-like
Cluster-26641.21293	3.145	0.8475	UP	uncharacterized protein LOC111026940
Cluster-26641.14841	192.06	40.66	UP	RR1 cuticle protein 1 precursor
Cluster-26641.7784	117.1	23.9375	UP	fatty acid synthase
Cluster-26641.8439	23.96	35.0325	DOWN	GTP:AMP phosphotransferase AK3, mitochondrial isoform X1
Cluster-26641.8438	4.6975	6.165	DOWN	GTP:AMP phosphotransferase AK3, mitochondrial isoform X1
Cluster-26641.10698	53.04	6.5425	UP	esterase FE4
Cluster-26641.21180	2.995	3.8175	DOWN	syntaxin-like isoform X1
Cluster-26641.13996	47.525	322.058	DOWN	ACYPI002892
Cluster-26641.12470	21.07	28.3275	DOWN	ACYPI43895
Cluster-26641.11871	15.5125	20.23	DOWN	uncharacterized protein LOC100159902 isoform X1
Cluster-31596.0	0.4875	1.16	DOWN	uncharacterized protein LOC100574851
Cluster-26641.12781	65.34	103.44	DOWN	ATP-binding cassette sub-family G member 4
Cluster-26641.12788	8.635	11.34	DOWN	NAD..P.. transhydrogenase, mitochondrial-like
Cluster-7611.0	0	0.22	DOWN	splicing factor 1
Cluster-26641.13436	23231.5	440.392	UP	uncharacterized protein LOC100570877
Cluster-26641.17950	5.4625	1.2075	UP	putative serine protease K12H4.7
Cluster-26641.13439	464.795	1083.17	DOWN	uncharacterized protein LOC107163372
Cluster-26641.11955	1.43	2.2	DOWN	protein FAM166B-like
Cluster-26641.16661	0.9375	3.57	DOWN	nose resistant to fluoxetine protein 6
Cluster-28819.0	0.0025	0.1225	DOWN	flocculation protein FLO11
Cluster-26641.8433	5.3925	1.3525	UP	protein lin-9 homolog
Cluster-26641.1436	0.015	0.2325	DOWN	protein encore isoform X4
Cluster-26641.7598	4.8375	6.7875	DOWN	alpha-tocopherol transfer protein
Cluster-26641.13870	3.535	16.5475	DOWN	piggyBac transposable element-derived protein 3-like
Cluster-27689.0	0.0325	0.21	DOWN	rffH
Cluster-26641.13656	28.69	42.8125	DOWN	MPA13 allergen-like isoform X1
Cluster-26641.13235	172.382	53.3475	UP	protein disulfide-isomerase
Cluster-26641.13230	313.438	573.688	DOWN	hypothetical protein CRE_03576
Cluster-26641.1190	0.2575	1.535	DOWN	phosphoglycerate kinase
Cluster-30850.0	0.03	0.91	DOWN	cholinephosphotransferase 1 isoform X2
Cluster-26641.13900	61.4075	92.1025	DOWN	MPA13 allergen-like
Cluster-26641.4135	7.8725	2.405	UP	TFIIH basal transcription factor complex helicase XPD subunit
Cluster-7308.0	0	0.1825	DOWN	ribonuclease Z, mitochondrial isoform X1
Cluster-26641.9017	2.2875	0.565	UP	ecdysone-induced protein 78C isoform X1
Cluster-26641.12629	17.995	23.515	DOWN	putative defense protein Hdd11
Cluster-26641.12625	30.7675	44.045	DOWN	uncharacterized protein LOC107167851 isoform X1
Cluster-26641.12620	7.8975	13.8825	DOWN	hypothetical protein CRE_03576
Cluster-39716.0	0.9075	1.34	DOWN	uncharacterized protein LOC100161421
Cluster-26641.25346	0.0075	0.14	DOWN	eIF-2-alpha kinase GCN2
Cluster-26641.13575	8.2025	2.2575	UP	V-type proton ATPase 16 kDa proteolipid subunit
Cluster-26449.0	0.04	0.5175	DOWN	ferrochelatase, mitochondrial
Cluster-26641.20442	2.9375	0.2875	UP	elongation of very long chain fatty acids protein 4-like
Cluster-39940.0	0.12	0.9725	DOWN	uncharacterized protein LOC111042643
Cluster-32327.0	0.0375	0.415	DOWN	indole-3-acetaldehyde oxidase
Cluster-26641.25167	0.0325	0.86	DOWN	aquaporin AQPAe.a isoform X1
Cluster-26641.7924	0.53	1.9375	DOWN	uncharacterized protein LOC100167995 isoform X6
Cluster-26641.7926	4.5625	7.965	DOWN	uncharacterized protein LOC100569394
Cluster-40424.0	0.0075	0.235	DOWN	cleavage and polyadenylation specificity factor subunit 1
Cluster-30437.0	0.3725	0.0075	UP	uncharacterized protein LOC111030445
Cluster-26641.3714	4.2575	0.9075	UP	uncharacterized protein LOC100169054 isoform X1
Cluster-26641.5651	6.7425	2.0825	UP	uncharacterized protein LOC111038774
Cluster-26641.5659	0.6875	49.6425	DOWN	hypothetical protein TELCIR_18614
Cluster-30373.0	2.1025	3.6375	DOWN	Chlorophyll a-b binding protein 40, chloroplastic
Cluster-26641.4527	1.845	2.38	DOWN	uncharacterized protein LOC100168196
Cluster-26641.6675	12.765	2.4775	UP	ABC transporter G family member 7-like
Cluster-26641.9018	0.9725	0.24	UP	ras guanine nucleotide exchange factor P-like
Cluster-26641.9015	1.635	3.1775	DOWN	oligoribonuclease
Cluster-16972.0	0.01	0.3375	DOWN	2-hydroxyacyl-CoA lyase 1
Cluster-26641.8059	3.9325	6.4825	DOWN	dual specificity phosphatase 21
Cluster-26641.8055	0.5575	1.3925	DOWN	uncharacterized protein LOC100570038 isoform X1
Cluster-26641.15989	15.4975	3.3375	UP	prostaglandin reductase 1
Cluster-26641.12970	108.3	178.66	DOWN	hypothetical protein TTRE_0000953901
Cluster-26641.12971	3.69	5.76	DOWN	hypothetical protein DAPPUDRAFT_118838
Cluster-26641.12973	7.9875	22.3675	DOWN	hypothetical protein CRE_03576
Cluster-8679.0	0	0.5625	DOWN	39S ribosomal protein L46, mitochondrial
Cluster-26301.1	0	0.2325	DOWN	uncharacterized protein LOC105228242
Cluster-26641.14119	371.608	14.47	UP	uncharacterized protein LOC100570877
Cluster-26641.14117	270.68	45.4425	UP	esterase FE4-like isoform X3
Cluster-26641.19779	1.99	11.05	DOWN	facilitated trehalose transporter Tret1-like
Cluster-35847.0	0.0525	0.8475	DOWN	leptin receptor gene-related protein isoform X1
Cluster-26641.19402	10.82	0.495	UP	protein Diedel
Cluster-26641.21936	0	0.455	DOWN	peptidyl-prolyl cis-trans isomerase FKBP2
Cluster-1190.2	0	0.84	DOWN	uncharacterized protein LOC105224300
Cluster-26641.13417	0.9275	1.6225	DOWN	uncharacterized protein LOC100574940
Cluster-26641.5034	0.47	0.8625	DOWN	uncharacterized protein LOC100161017
Cluster-23831.0	0.0325	0.6575	DOWN	KH domain-containing, RNA-binding, signal transduction-associated protein 2
Cluster-8800.0	0	0.16	DOWN	LOW QUALITY PROTEIN: uncharacterized protein LOC105225235
Cluster-26641.8034	4.315	6.0975	DOWN	uncharacterized protein LOC111035809
Cluster-26641.4340	0.7375	0.1025	UP	cuticular protein-like precursor
Cluster-26641.7069	2.1	10.8375	DOWN	neither inactivation nor afterpotential protein C
Cluster-26641.2581	0.0125	0.39	DOWN	protein CNPPD1
Cluster-26641.2583	0.2225	1.8125	DOWN	GTP-binding protein SAR1
Cluster-26641.9202	31.925	9.35	UP	60S ribosomal protein L22-like
Cluster-26641.13704	350.31	30.2025	UP	fatty acid synthase
Cluster-26641.2527	0	5.2	DOWN	chorion protein S16
Cluster-30712.0	0.045	0.435	DOWN	protein purity of essence
Cluster-26738.0	0.025	0.645	DOWN	eukaryotic peptide chain release factor GTP-binding subunit ERF3A isoform X1
Cluster-26641.11803	30.0675	41.7025	DOWN	cytochrome c oxidase subunit III ..mitochondrion..
Cluster-26641.7257	21.47	6.63	UP	androgen-induced gene 1 protein-like
Cluster-37707.3	0.715	1.2125	DOWN	hypothetical protein NCLIV_068840
Cluster-26641.14026	37.3375	4.5725	UP	uncharacterized protein LOC111036037
Cluster-26641.21009	5.2825	7.1975	DOWN	AKH preprohormone
Cluster-26641.7518	25.245	1.45	UP	uncharacterized protein LOC100570877
Cluster-26641.5910	2.005	0.5425	UP	uncharacterized protein LOC111032763 isoform X1
Cluster-26641.1115	0.0025	0.1075	DOWN	activating transcription factor 7-interacting protein 1
Cluster-26641.25362	0.035	0.8975	DOWN	uncharacterized protein LOC105226040
Cluster-26641.5294	0.445	1.2175	DOWN	obscurin-like isoform X3
Cluster-26641.13983	257.478	54.6075	UP	protein takeout-like, partial
Cluster-26641.10951	60.9325	103.713	DOWN	repetitive proline-rich cell wall protein 2-like
Cluster-12674.0	0.005	0.2175	DOWN	putative 1-phosphatidylinositol 3-phosphate 5-kinase
Cluster-26641.15774	52.8275	6.38	UP	UDP-glucuronosyl transferase 350C3
Cluster-7783.0	0	1.5725	DOWN	hup
Cluster-26641.15476	34.3075	10.5275	UP	uncharacterized protein LOC100165422
Cluster-26641.22122	28.9825	3.9225	UP	pancreatic lipase-related protein 2
Cluster-4376.1	0.015	0.665	DOWN	N-acetylglucosamine-6-sulfatase
Cluster-26641.22697	3.74	0.895	UP	uncharacterized protein LOC111040445 isoform X1
Cluster-26641.1359	0.015	0.3025	DOWN	polycomb group RING finger protein 3
Cluster-26641.21093	0.0975	10.9325	DOWN	H..+....Cl..-.. exchange transporter 7-like
Cluster-26641.8646	12.6775	40.775	DOWN	phosphoenolpyruvate carboxykinase
Cluster-6857.1	0.045	0.4025	DOWN	transposase ..Tn10..
Cluster-437.1	0.025	0.265	DOWN	uncharacterized protein LOC105231545
Cluster-26641.15593	21.1325	31.6075	DOWN	uncharacterized protein LOC111029208
Cluster-27463.0	0.36	0.97	DOWN	zinc finger BED domain-containing protein 1-like
Cluster-28958.0	0.025	0.3375	DOWN	ras-related GTP-binding protein C
Cluster-26641.15908	93.535	146.853	DOWN	PERQ amino acid-rich with GYF domain-containing protein CG11148
Cluster-26641.15904	0.345	0.7775	DOWN	pyrC
Cluster-32398.0	0.06	0.755	DOWN	UDP-xylose and UDP-N-acetylglucosamine transporter isoform X2
Cluster-26641.862	0.0075	0.315	DOWN	FK506-binding protein 5 isoform X1
Cluster-26641.9088	14.7825	4.5575	UP	transcription factor 12 isoform X6
Cluster-37174.0	0.035	0.4475	DOWN	protein cueball
Cluster-7901.0	0	0.1525	DOWN	uncharacterized protein LOC105223541
Cluster-26641.8930	4.2675	8.4125	DOWN	uncharacterized protein LOC107170120
Cluster-26641.11013	8.995	0.34	UP	skin secretory protein xP2-like
Cluster-26641.11016	6.41	1.6675	UP	uncharacterized protein LOC111029847
Cluster-9580.0	0	0.4325	DOWN	protein odr-4 homolog
Cluster-26641.476	0.1575	0.425	DOWN	insF
Cluster-26641.20521	7.58	11.6625	DOWN	histone H4-like, partial
Cluster-26641.13327	134.885	171.472	DOWN	putative chemosensory protein CSP2
Cluster-26641.15628	0.9075	0.1475	UP	uncharacterized protein LOC100571104
Cluster-26641.8687	7.3725	10.3225	DOWN	lachesin-like isoform X1
Cluster-9190.0	0	0.605	DOWN	embryonic stem cell-specific 5-hydroxymethylcytosine-binding protein
Cluster-26641.1276	0.025	0.485	DOWN	transcription initiation factor IIA subunit 1 isoform X2
Cluster-26641.14495	22.445	28.0375	DOWN	ataxin-2 homolog
Cluster-26641.3617	1.4	0.425	UP	acetyl-coenzyme A transporter 1-like
Cluster-26641.15543	36.7875	5.205	UP	hypothetical protein DDB_G0279493
Cluster-26641.802	3.63	0.8275	UP	cytochrome P450 307A1
Cluster-26641.3830	3.205	0.77	UP	gastric triacylglycerol lipase 1
Cluster-26641.2684	1.7775	0.485	UP	sodium-dependent dopamine transporter-like
Cluster-25443.0	1.085	0.1525	UP	uncharacterized protein LOC100574284 isoform X2
Cluster-26641.6339	5.73	19.57	DOWN	arrestin homolog
Cluster-26641.273	0.2775	0.59	DOWN	ilvI
Cluster-26641.1287	0.0275	0.49	DOWN	E3 ubiquitin-protein ligase hyd isoform X2
Cluster-24689.0	0.0225	0.6575	DOWN	splicing factor 3B subunit 4
Cluster-26641.17333	15.9825	22.2075	DOWN	islet cell autoantigen 1-like protein
Cluster-40048.0	0.1575	0.3975	DOWN	transposase for transposon tn21
Cluster-26641.10645	19.7825	26.3275	DOWN	titin isoform X2
Cluster-26641.10401	22.305	28.48	DOWN	chromatin assembly factor 1 subunit A
Cluster-38455.0	0.3275	0.8975	DOWN	Isocitrate lyase
Cluster-26641.14010	945.685	3288.98	DOWN	hypothetical protein TELCIR_18614
Cluster-26641.12753	472.918	96.8275	UP	takeout-like precursor
Cluster-39564.0	1.82	4.4875	DOWN	acetyl-coenzyme A transporter 1 isoform X1
Cluster-26641.21088	4.095	9.8925	DOWN	esterase E4-like
Cluster-7905.0	0	0.1975	DOWN	melanotransferrin
Cluster-26641.8519	15.53	4.2025	UP	voltage-dependent L-type calcium channel subunit beta-1-like
Cluster-26641.14504	315.6	97.8825	UP	calreticulin
Cluster-26641.6242	7.2075	1.295	UP	ACYPI008145
Cluster-26641.12996	1360.86	178.33	UP	esterase E4-like isoform X1
Cluster-27864.0	0.0325	0.4825	DOWN	eukaryotic translation initiation factor 5
Cluster-26641.5496	5.0725	21.51	DOWN	facilitated trehalose transporter Tret1-like
Cluster-26641.5497	0.3575	0.8075	DOWN	facilitated trehalose transporter Tret1-like
Cluster-26641.5499	1.8525	0.445	UP	homeobox protein goosecoid-like
Cluster-26641.5726	3.605	5.84	DOWN	uncharacterized protein LOC111035273
Cluster-13669.0	0.0075	0.3525	DOWN	probable Golgi SNAP receptor complex member 2
Cluster-26641.8835	1.285	3.5525	DOWN	ACYPI000784
Cluster-15454.0	0.0025	0.1525	DOWN	importin-11
Cluster-14263.0	0.005	0.2825	DOWN	uridine-cytidine kinase-like 1 isoform X1
Cluster-26641.21866	2.6675	5.145	DOWN	hypothetical protein CRE_23800
Cluster-26641.21867	3.4575	7.385	DOWN	hypothetical protein CRE_23800
Cluster-33181.0	0.01	0.305	DOWN	dnaJ homolog subfamily C member 21
Cluster-30102.0	0.0375	0.245	DOWN	expressed hypothetical protein
Cluster-26641.21322	9.2275	27.9875	DOWN	ABC transporter G family member 23 variant X2
Cluster-27718.0	0.015	0.22	DOWN	LETM1 and EF-hand domain-containing protein anon-60Da, mitochondrial
Cluster-26641.7411	0.01	0.32	DOWN	mitochondrial-processing peptidase subunit beta
Cluster-26641.3561	1.415	0.065	UP	RNA-directed DNA polymerase from mobile element jockey-like
Cluster-752.1	0.0175	0.225	DOWN	probable E3 ubiquitin-protein ligase HERC4
Cluster-26641.14554	17.4125	5.0375	UP	trithorax group protein osa-like isoform X2
Cluster-26641.17497	16.06	24.795	DOWN	uncharacterized protein LOC100572239
Cluster-30841.0	0.045	0.415	DOWN	moesin..ezrin..radixin homolog 2
Cluster-8030.0	0	0.41	DOWN	E3 ubiquitin-protein ligase RING1 isoform X2
Cluster-27352.0	0.345	1.0275	DOWN	ABC transporter permease protein
Cluster-31680.0	1.6225	6.17	DOWN	heat shock cognate 90 kDa protein-like
Cluster-13244.0	0.015	0.8025	DOWN	SUMO-activating enzyme subunit 1
Cluster-15272.0	0.025	0.7	DOWN	gamma-soluble NSF attachment protein
Cluster-26641.15537	68.3125	13.905	UP	glutathione S-transferase 1-1-like
Cluster-26641.9593	3.3675	6.3775	DOWN	uncharacterized protein LOC100166395 isoform X2
Cluster-26641.25405	0.0125	0.265	DOWN	protein spire
Cluster-26641.15395	6.2825	1.59	UP	dual specificity protein phosphatase CDC14B
Cluster-26641.16848	14.7325	1.4825	UP	uncharacterized protein LOC111038230
Cluster-7547.0	0	0.29	DOWN	pre-mRNA-processing factor 40 homolog A
Cluster-26641.25225	0.0075	0.1625	DOWN	uncharacterized protein LOC105225045 isoform X2
Cluster-26641.18705	7.1975	11.3925	DOWN	LOW QUALITY PROTEIN: eukaryotic translation initiation factor 4 gamma 3-like
Cluster-26641.5222	0.3025	2.785	DOWN	hypothetical protein IscW_ISCW024385
Cluster-26641.5598	0.2675	56.9975	DOWN	flightin
Cluster-26641.9511	4.06	0.995	UP	esterase E4
Cluster-35108.0	0.185	2.8	DOWN	ADP-ribosylation factor 2
Cluster-26641.3621	2.075	0.58	UP	protein unc-80 homolog isoform X1
Cluster-26641.1785	0.005	0.16	DOWN	JNK-interacting protein 3 isoform X8
Cluster-26641.8983	2.8125	7.7075	DOWN	cytochrome oxidase subunit I, partial ..mitochondrion..
Cluster-26641.8894	3.2775	10.4925	DOWN	hypothetical protein TTRE_0000953901
Cluster-26641.25498	0.0575	0.9625	DOWN	protein SEC13 homolog
Cluster-26641.2294	8.085	11.465	DOWN	tachykinins-like
Cluster-26641.20883	2.04	10.66	DOWN	opsin, ultraviolet-sensitive-like
Cluster-26641.14094	7.35	2.04	UP	protein Teyrha-meyrha-like isoform X2
Cluster-26641.14096	68.8875	14.2875	UP	general transcription factor 3C polypeptide 1 isoform X2
Cluster-26641.25565	0.005	0.355	DOWN	U1 small nuclear ribonucleoprotein 70 kDa
Cluster-26641.25588	0.03	0.285	DOWN	dynein heavy chain, cytoplasmic isoform X1
Cluster-20226.0	0.1325	1.055	DOWN	cytochrome c oxidase subunit 7C, mitochondrial
Cluster-26641.12913	0.86	0.235	UP	uncharacterized protein LOC107172728
Cluster-26641.6946	7.615	1.655	UP	transcription factor AP-2-epsilon isoform X1
Cluster-26641.1853	0.47	2.9925	DOWN	DNA ligase-like
Cluster-26641.10402	26.47	33.025	DOWN	chromatin assembly factor 1 subunit A
Cluster-26641.7307	3.675	0.7925	UP	fatty acid synthase-like
Cluster-27151.0	3.47	7.0225	DOWN	peptidoglycan hydrolase FlgJ-like
Cluster-26641.8639	33.3975	5.7775	UP	zinc finger MYM-type protein 1-like
Cluster-26641.4459	7.1925	13.6825	DOWN	chemosensory protein 1
Cluster-26641.4450	0.3975	0.705	DOWN	uncharacterized protein LOC111689111
Cluster-26641.4453	0	1.9325	DOWN	urease accessory protein UreE-like
Cluster-26641.4452	0	1.03	DOWN	chorion protein S36
Cluster-12295.0	0.01	0.35	DOWN	probable cytosolic Fe-S cluster assembly factor GI11683
Cluster-26641.15835	589.418	70.9875	UP	larval cuticle protein LCP-22-like isoform X1
Cluster-26641.15833	29.58	8.435	UP	proton-coupled amino acid transporter-like protein pathetic
Cluster-26641.16562	1.3275	2.47	DOWN	glycine receptor subunit alpha-2-like
Cluster-26641.16566	17.7625	4.5825	UP	uncharacterized protein LOC100569770 isoform X3
Cluster-26641.13934	13.0425	16.5875	DOWN	titin
Cluster-26641.20889	5.985	38.4975	DOWN	alpha-tocopherol transfer protein
Cluster-26641.7045	2.4875	0.415	UP	hepatocyte nuclear factor 6-like isoform X3
Cluster-35428.0	3.97	5.035	DOWN	uncharacterized protein LOC111029158
Cluster-26641.987	0.005	0.2575	DOWN	tudor and KH domain-containing protein
Cluster-9460.0	0	0.325	DOWN	probable malate:quinone oxidoreductase
Cluster-5042.1	0.0075	0.22	DOWN	uncharacterized protein LOC108965155
Cluster-26641.7974	5.485	8.6175	DOWN	dual oxidase maturation factor 1
Cluster-13190.0	0.0275	1.16	DOWN	39S ribosomal protein L51, mitochondrial
Cluster-26641.17768	3.4775	6.2625	DOWN	histone H3
Cluster-8193.0	0	0.6375	DOWN	uncharacterized protein LOC108974367
Cluster-26641.3722	6.6375	1.1125	UP	facilitated trehalose transporter Tret1-like
Cluster-14041.0	0.0025	0.255	DOWN	protein bunched, class 1..class 3..D..E isoforms isoform X2
Cluster-26121.0	0.0525	1.0575	DOWN	ubiquitin carboxyl-terminal hydrolase 14
Cluster-26641.20	1.13	0.215	UP	transcriptional activator GLI3
Cluster-26641.14441	0.4525	1.0975	DOWN	RING finger protein nhl-1 isoform X2
Cluster-26641.9375	0.6525	3.6675	DOWN	death-associated protein kinase related-like
Cluster-26641.4003	0.23	0.7675	DOWN	malate dehydrogenase-like isoform X1
Cluster-9087.0	0	0.4225	DOWN	mRNA export factor
Cluster-33344.0	0.0075	0.475	DOWN	zinc finger protein 12-like
Cluster-31192.0	0.005	0.3025	DOWN	uncharacterized protein LOC105229959 isoform X3
Cluster-12968.0	0.0075	0.22	DOWN	LOW QUALITY PROTEIN: tudor domain-containing protein 7
Cluster-26641.14166	42.3975	13.19	UP	GL23756
Cluster-26641.7754	5.73	1.325	UP	headcase protein
Cluster-8119.0	0	0.205	DOWN	DDB1- and CUL4-associated factor 11
Cluster-26641.13180	57.515	17.3725	UP	cuticle protein-like
Cluster-26641.5185	4.915	8.445	DOWN	uncharacterized protein LOC111031390
Cluster-26641.26304	0.005	0.25	DOWN	regulator of nonsense transcripts 1 homolog
Cluster-26641.26305	0.0025	0.15	DOWN	serine..threonine-protein kinase N
Cluster-24526.0	0.0075	0.135	DOWN	ras-associated and pleckstrin homology domains-containing protein 1 isoform X1
Cluster-15854.0	0.0025	0.21	DOWN	serine..threonine-protein kinase PRP4 homolog
Cluster-26641.10061	6.895	10.5725	DOWN	ATP-binding cassette sub-family G member 4 variant X1
Cluster-26641.8265	1.3775	0.225	UP	uncharacterized protein LOC107164707 isoform X1
Cluster-26641.2573	5.83	1.6275	UP	lysosomal aspartic protease
Cluster-26641.2574	0.165	2.3	DOWN	uncharacterized protein LOC105231875
Cluster-26641.2576	0.985	1.6175	DOWN	uncharacterized protein LOC103309069
Cluster-26641.2579	0.015	0.9975	DOWN	chorion protein S38
Cluster-26641.14761	2.175	0.6175	UP	uncharacterized protein LOC100575888 isoform X1
Cluster-26641.9491	1.97	0.5175	UP	probable phospholipid-transporting ATPase IA isoform X1
Cluster-26641.11739	31.955	7.775	UP	tricarboxylate transport protein, mitochondrial
Cluster-26641.12424	15.4625	20.145	DOWN	venom dipeptidyl peptidase 4 isoform X2
Cluster-26641.9233	4.4	5.6	DOWN	histone H2A
Cluster-26641.1006	0.025	1.905	DOWN	39S ribosomal protein L16, mitochondrial
Cluster-26641.16058	5.145	21.05	DOWN	opsin, ultraviolet-sensitive
Cluster-26641.13485	8.0225	1.12	UP	putative cathepsin B-N
Cluster-26641.13483	105.008	23.475	UP	putative cathepsin precursor
Cluster-26641.13482	817.102	64.2725	UP	putative cathepsin B-N
Cluster-25475.0	0.1325	3.7325	DOWN	uncharacterized protein LOC105226194
Cluster-28778.0	0.015	0.2375	DOWN	chromatin-remodeling complex ATPase chain Iswi
Cluster-8719.0	0	0.42	DOWN	LOW QUALITY PROTEIN: glucose-fructose oxidoreductase domain-containing protein 1
Cluster-22677.0	0.005	0.28	DOWN	endochitinase A
Cluster-26641.5922	0.7475	1.185	DOWN	dynein regulatory complex subunit 7-like
Cluster-26641.1122	0	0.3975	DOWN	guanine nucleotide-binding protein G..s.. subunit alpha
Cluster-35619.0	0.02	0.335	DOWN	RING finger protein 10
Cluster-26641.15407	119.485	295.957	DOWN	uncharacterized protein LOC107163372
Cluster-26641.25317	0	0.2025	DOWN	protein kintoun
Cluster-26641.13528	14.14	2.7025	UP	maltase A2 isoform X1
Cluster-26641.13522	34.37	6.685	UP	chorion peroxidase
Cluster-7768.0	0	0.8075	DOWN	60S ribosome subunit biogenesis protein NIP7 homolog
Cluster-26641.367	5.285	1.4725	UP	uncharacterized protein LOC111041447
Cluster-28256.0	1.7975	0.37	UP	delta..24..-sterol reductase-like isoform X3
Cluster-32172.0	0.0375	0.39	DOWN	atlastin
Cluster-26641.5358	7.8425	2.1375	UP	uncharacterized protein LOC111035976
Cluster-26638.0	0.1375	1.5475	DOWN	uncharacterized protein LOC105229807
Cluster-26641.4087	1.47	0.2975	UP	pumilio homolog 2 isoform X1
Cluster-26641.7195	1.97	0.4025	UP	glycoprotein 3-alpha-L-fucosyltransferase A-like
Cluster-26641.9374	9.005	25.7425	DOWN	death-associated protein kinase related-like
Cluster-403.1	0	0.31	DOWN	probable phosphorylase b kinase regulatory subunit beta isoform X1
Cluster-26641.1309	0.0375	1.065	DOWN	exosome complex component RRP43 isoform X1
Cluster-25009.0	0.02	0.455	DOWN	alanine--tRNA ligase, cytoplasmic
Cluster-40387.0	0.2425	0.3775	DOWN	uncharacterized protein LOC100570038 isoform X1
Cluster-26641.167	0.01	0.34	DOWN	peptidyl-prolyl cis-trans isomerase CWC27 homolog
Cluster-23610.0	0.01	0.2325	DOWN	cyclic AMP response element-binding protein B isoform X2
Cluster-26641.16488	533.053	36.7275	UP	putative cathepsin B-N
Cluster-26641.13054	67.995	18.29	UP	DNA N6-methyl adenine demethylase
Cluster-26641.16739	13.3775	3.4575	UP	uncharacterized protein LOC111036229
Cluster-26641.17285	7.635	1.0525	UP	uncharacterized protein LOC100163240
Cluster-26641.17287	24.94	4.59	UP	venom serine carboxypeptidase-like
Cluster-26641.10774	18.1875	35.5175	DOWN	WD repeat-containing protein 6 isoform X1
Cluster-26641.23858	123.987	8.9075	UP	uncharacterized protein LOC100570877
Cluster-26641.14258	501.895	956.485	DOWN	Uncharacterized protein APZ42_008836, partial
Cluster-26641.9524	5.2325	1.4375	UP	extensin-like
Cluster-26641.25120	0.0225	0.29	DOWN	trifunctional purine biosynthetic protein adenosine-3
Cluster-26641.443	0.0175	0.91	DOWN	splicing factor 3B subunit 6-like protein
Cluster-26641.15252	2.555	0.5325	UP	basement membrane-specific heparan sulfate proteoglycan core protein isoform X1
Cluster-26641.3226	2.445	0.245	UP	uncharacterized protein LOC107161656
Cluster-37215.0	1.745	3.995	DOWN	arylsulfatase B-like
Cluster-26641.4994	7.2775	1.0875	UP	UDP-glucuronosyl transferase 342C2
Cluster-7884.0	0	0.51	DOWN	inhibitor of growth protein 5 isoform X1
Cluster-26641.25234	0.0475	0.5725	DOWN	ATP-dependent RNA helicase DBP2
Cluster-26641.1867	3.5275	0.99	UP	PWWP domain-containing protein 2A-like
Cluster-26641.7015	1.04	0.1375	UP	UDP-glucuronosyl transferase 344A14
Cluster-26641.6767	18.6475	5.7025	UP	tyrosine-protein kinase Btk29A isoform X1
Cluster-26641.1081	0.0025	0.125	DOWN	drebrin-like protein
Cluster-27375.0	1.5775	0.39	UP	tigger transposable element-derived protein 4-like
Cluster-26641.15668	8.0225	2.5125	UP	ACYPI009695
Cluster-26641.8106	0.7325	1.0475	DOWN	uncharacterized protein LOC100165313
Cluster-16123.0	0.03	1.77	DOWN	selT-like protein
Cluster-26641.18328	7.67	13.885	DOWN	dual oxidase
Cluster-26641.17391	3.71	1.045	UP	fatty acid synthase
Cluster-27947.1	8.2925	2.0625	UP	36.4 kDa proline-rich protein-like isoform X1
Cluster-4237.1	0.0175	0.415	DOWN	nuclear distribution protein nudE homolog isoform X3
Cluster-8758.0	0	1.16	DOWN	uncharacterized protein LOC105223276
Cluster-30563.0	0.005	0.1625	DOWN	uncharacterized protein LOC105226151
Cluster-30727.0	0.0025	0.1475	DOWN	helix-loop-helix protein 11
Cluster-26641.1426	0.015	0.3775	DOWN	galactosylgalactosylxylosylprotein 3-beta-glucuronosyltransferase S
Cluster-26641.14043	2456.09	11183.1	DOWN	hypothetical protein A3Q56_05216, partial
Cluster-8845.0	0	0.5725	DOWN	uncharacterized protein LOC100163120
Cluster-26641.24177	1.4825	0.2025	UP	zinc finger MYM-type protein 1-like
Cluster-26641.24172	0	0.1975	DOWN	rab GDP dissociation inhibitor alpha
Cluster-7714.0	0	0.38	DOWN	RAB6-interacting golgin isoform X1
Cluster-11069.0	0	0.3375	DOWN	acnA
Cluster-26641.16218	114.15	198.065	DOWN	cuticular protein analogous to peritrophins 3-B precursor
Cluster-15952.0	0.005	0.19	DOWN	transcription factor grauzone-like
Cluster-26641.16212	102.35	188.238	DOWN	PDZ and LIM domain protein 3 isoform X2
Cluster-26641.8563	0.3675	5.8325	DOWN	ACYPI005154
Cluster-26641.18686	0.435	20.53	DOWN	mpv17-like protein 2 isoform X2
Cluster-15615.0	0.0075	0.1825	DOWN	tubulin polyglutamylase TTLL5
Cluster-26641.11473	13.405	17.575	DOWN	zinc finger CCHC domain-containing protein 7-like
Cluster-26641.14536	1141.85	89.01	UP	uncharacterized protein LOC111036037
Cluster-26641.14537	5.28	0.24	UP	uncharacterized protein LOC111036037
Cluster-26641.9176	14.8225	20.7425	DOWN	complexin isoform X1
Cluster-26641.1765	0.005	0.245	DOWN	protein son of sevenless
Cluster-26641.676	2.7925	0.16	UP	uncharacterized protein LOC100568563
Cluster-26641.13308	182.815	31.365	UP	lactase-phlorizin hydrolase-like
Cluster-32089.0	0.015	0.32	DOWN	E3 ubiquitin-protein ligase HRD1
Cluster-24144.0	0.7625	1.09	DOWN	olfactory receptor 43 protein
Cluster-26641.217	1.745	0.2425	UP	major facilitator superfamily domain-containing protein 6-like
Cluster-26641.9173	0.7925	1.46	DOWN	uncharacterized protein LOC100160930 isoform X1
Cluster-4965.1	0.0075	0.225	DOWN	protein wings apart-like
Cluster-29422.0	0.0125	0.2775	DOWN	uncharacterized protein LOC105227390 isoform X1
Cluster-38353.0	0.11	1.355	DOWN	52 kDa repressor of the inhibitor of the protein kinase-like
Cluster-26641.9817	1.2725	0.3875	UP	tectonic-3
Cluster-26641.4002	0.1975	0.75	DOWN	uncharacterized protein LOC111027599
Cluster-26641.4000	7.6525	11.105	DOWN	uncharacterized protein LOC100306981
Cluster-26641.6539	30.2325	38.2375	DOWN	uncharacterized protein LOC107169326 isoform X2
Cluster-26641.16522	209.53	64.1975	UP	uncharacterized protein LOC111039766
Cluster-26641.5843	6.8025	1.9575	UP	extensin-2 isoform X1
Cluster-26641.20130	13.455	19.645	DOWN	guanylate cyclase soluble subunit beta-1
Cluster-35393.0	52.8475	9.7425	UP	cathepsin B-16D2 precursor
Cluster-26641.12988	5.8625	12.105	DOWN	cell cycle checkpoint protein RAD17, partial
Cluster-26641.15240	0.435	0.97	DOWN	unnamed protein product
Cluster-33916.0	0.015	0.16	DOWN	E3 ubiquitin-protein ligase RNF13 isoform X2
Cluster-26641.15457	7.96	14.1	DOWN	Zinc finger protein 208
Cluster-26641.19235	4.8625	0.1675	UP	delta-9 desaturase-like isoform X1
Cluster-26641.2372	15.175	3.3225	UP	flexible cuticle protein 12-like
Cluster-26641.8617	12.0675	3.0975	UP	uncharacterized protein LOC100167473
Cluster-26641.17119	16.125	20.7975	DOWN	NACHT and WD repeat domain-containing protein 2 isoform X4
Cluster-26641.12515	58.08	15.1875	UP	glutathione S-transferase-like protein
Cluster-26641.12519	1738.6	2471.61	DOWN	NADH dehydrogenase subunit 4 ..mitochondrion..
Cluster-26641.23820	1.88	10.2575	DOWN	trehalase isoform X2
Cluster-25917.0	0.095	1.26	DOWN	acetyl-CoA acetyltransferase, mitochondrial
Cluster-24266.0	0.0875	3.3925	DOWN	UDP-glucuronosyltransferase 2B7-like
Cluster-26641.12688	8.31	12.1	DOWN	NADH dehydrogenase subunit 1 ..mitochondrion..
Cluster-26641.8452	7.365	2.0325	UP	alpha-..1,6..-fucosyltransferase
Cluster-22908.0	0.01	0.2225	DOWN	uncharacterized protein LOC105231344
Cluster-26641.975	0.015	0.5	DOWN	protein Mo25
Cluster-26641.970	0.025	0.635	DOWN	protein peanut
Cluster-25360.0	0.0325	0.6425	DOWN	actin-related protein 2
Cluster-26641.15671	24.5525	6.8975	UP	hypothetical protein TSAR_011928
Cluster-26641.9443	50.135	182.565	DOWN	hsp70-1
Cluster-26641.9444	89.9475	338.28	DOWN	heat shock protein 70-2
Cluster-9017.0	0	1.16	DOWN	ACYPI000043
Cluster-26641.568	0.5925	1.0625	DOWN	cuticle protein 19-like
Cluster-26641.12725	12.0525	1.86	UP	extensin-2-like
Cluster-39545.0	3.5075	8.685	DOWN	rhodopsin-like isoform X1
Cluster-26641.20785	2.1675	4.2425	DOWN	uncharacterized protein LOC103309618
Cluster-26641.20781	0.35	0.81	DOWN	trxB
Cluster-6414.1	0.025	1.11	DOWN	transmembrane protein 209
Cluster-25412.1	0	0.5925	DOWN	conserved oligomeric Golgi complex subunit 3
Cluster-39204.0	0.0075	0.26	DOWN	neuropathy target esterase sws isoform X1
Cluster-9308.0	0	0.18	DOWN	BUB3-interacting and GLEBS motif-containing protein ZNF207 isoform X2
Cluster-26641.23522	0	0.355	DOWN	protein krasavietz isoform X2
Cluster-26641.10381	28.0775	39.765	DOWN	uncharacterized protein LOC106109156
Cluster-26641.5779	0.5625	0.735	DOWN	LOW QUALITY PROTEIN: dynein heavy chain 2, axonemal-like
Cluster-26641.4792	10.7825	15.5025	DOWN	neuroglobin-1-like
Cluster-26641.6151	8.3275	12.505	DOWN	uncharacterized protein LOC100160253
Cluster-9399.0	0	0.215	DOWN	neurofilament heavy polypeptide
Cluster-26641.15268	19.6425	37.4225	DOWN	uncharacterized protein LOC111034622 isoform X1
Cluster-9068.0	0	0.3825	DOWN	zinc finger protein 665-like
Cluster-26641.8226	27.5975	5.7775	UP	uncharacterized protein LOC111034122
Cluster-26641.8224	7.7475	1.52	UP	proton-coupled amino acid transporter 2-like isoform X1
Cluster-26641.2480	0.0175	0.3225	DOWN	gamma-glutamyltranspeptidase 1-like isoform X1
Cluster-26641.15847	113.835	35.0775	UP	enolase isoform 2
Cluster-26641.8465	7.22	1.525	UP	muscarinic acetylcholine receptor DM1
Cluster-16945.0	0.0325	0.7575	DOWN	glucosamine-6-phosphate isomerase isoform X1
Cluster-35085.2	2.2625	3.4425	DOWN	EF-hand calcium-binding domain-containing protein 2-like
Cluster-27066.0	0.005	0.405	DOWN	WD repeat-containing protein 24
Cluster-9223.0	0	0.2525	DOWN	zinc finger protein 521
Cluster-9101.0	0	0.315	DOWN	zinc finger protein 2 homolog
Cluster-26641.21591	0.1375	2.4775	DOWN	protein slowmo
Cluster-26641.10997	48.7	14.5175	UP	trans-1,2-dihydrobenzene-1,2-diol dehydrogenase-like
Cluster-9559.0	0	0.155	DOWN	Fanconi anemia group I protein
Cluster-26641.21319	1.72	7.6	DOWN	uncharacterized protein LOC100161116 isoform X1
Cluster-28071.0	2.7675	7.175	DOWN	uncharacterized protein LOC111028051
Cluster-37918.0	0.055	0.4225	DOWN	dynein heavy chain 3, axonemal
Cluster-37918.1	0.085	0.49	DOWN	dynein heavy chain 3, axonemal-like
Cluster-26641.7947	11.4925	1.2625	UP	major facilitator superfamily domain-containing protein 6-like
Cluster-26641.1787	0.015	0.2575	DOWN	epsin-1
Cluster-35555.1	0.025	0.4	DOWN	calcineurin subunit B type 1
Cluster-26641.14474	5.995	1.58	UP	heat shock protein cognate 3 isoform X1
Cluster-10764.0	0.075	2.43	DOWN	uncharacterized protein LOC111031478
Cluster-26641.16833	2.6575	0.7175	UP	protein yellow-like
Cluster-26641.731	8.1	15.525	DOWN	eclosion hormone-like
Cluster-26641.13643	102.802	26.8025	UP	alkaline phosphatase
Cluster-26641.13646	194.545	57.105	UP	innexin inx2
Cluster-26641.194	1.1375	1.6125	DOWN	cathepsin O-like isoform X1
Cluster-26641.2694	0.1425	1.2925	DOWN	abnormal wing discs 2 isoform X1
Cluster-26641.19921	5.6125	8.5825	DOWN	uncharacterized protein LOC111032862
Cluster-26641.7936	1.1375	0.3425	UP	protein ANTAGONIST OF LIKE HETEROCHROMATIN PROTEIN 1-like
Cluster-26641.11732	2.7	4.345	DOWN	uncharacterized protein LOC100169101 isoform X1
Cluster-26641.25715	0.265	0.5	DOWN	uncharacterized protein LOC103311982
Cluster-25460.0	0.01	0.3475	DOWN	mitochondrial coenzyme A transporter SLC25A42
Cluster-26641.4126	0.745	1.0525	DOWN	pickpocket protein 28-like isoform X1
Cluster-31175.0	0.0075	0.2625	DOWN	putative uncharacterized protein DDB_G0291608
Cluster-26641.12899	45.91	81.25	DOWN	uncharacterized protein LOC111032177
Cluster-26641.25509	0.0525	0.555	DOWN	glycogenin-1 isoform X2
Cluster-26641.3470	3.8425	1.11	UP	uncharacterized protein LOC100576041
Cluster-26641.16369	4.3525	6.605	DOWN	LOW QUALITY PROTEIN: carboxypeptidase D
Cluster-8203.1	0.0225	0.425	DOWN	fatty-acid amide hydrolase 2-B
Cluster-26641.17097	11.6675	3.36	UP	protein Gawky isoform X1
Cluster-12990.0	0.0125	0.37	DOWN	calcium-binding mitochondrial carrier protein SCaMC-3 isoform X2
Cluster-8652.2	0	0.8275	DOWN	sodium-coupled monocarboxylate transporter 2-like, partial
Cluster-26641.9995	3.1875	0.9325	UP	guanine nucleotide-releasing factor 2 isoform X2
Cluster-26641.13484	241.77	19.4275	UP	cathepsin B-like cysteine proteinase 4
Cluster-26641.11851	19.27	4.93	UP	zinc finger homeobox protein 3 isoform X3
Cluster-26641.17931	10.0475	22.79	DOWN	histone H2A
Cluster-26641.21704	0.0375	0.4325	DOWN	reverse transcriptase
Cluster-13897.0	0.0025	0.1425	DOWN	zinc finger FYVE domain-containing protein 9
Cluster-9783.0	0	0.1775	DOWN	putative elongator complex protein 1
Cluster-26641.10272	2.3875	0.29	UP	esterase E4
Cluster-26641.14824	137.262	170.877	DOWN	LOW QUALITY PROTEIN: uncharacterized protein LOC108664000
Cluster-26641.14827	348.392	668.465	DOWN	hypothetical protein TTRE_0000953901
Cluster-26641.3158	1.1375	2.355	DOWN	tetratricopeptide repeat protein 39C-like isoform X1
Cluster-26641.1172	0.1275	1.9875	DOWN	26S proteasome non-ATPase regulatory subunit 6
Cluster-26641.16530	3.42	5.09	DOWN	cytochrome P450 6CY9
Cluster-26641.7325	18.3975	40.0575	DOWN	tubulin-specific chaperone cofactor E-like protein
Cluster-26641.7124	0.14	1.57	DOWN	prohibitin-2
Cluster-26641.7646	135.29	614.985	DOWN	LOW QUALITY PROTEIN: uncharacterized protein LOC111056807
Cluster-26641.15189	5.915	0.8025	UP	probable multidrug resistance-associated protein lethal..2..03659
Cluster-26641.15183	17.385	21.855	DOWN	lipase 3
Cluster-26641.13553	30.355	6.1625	UP	gamma-glutamyltranspeptidase 1
Cluster-26641.79	0.2225	0.4075	DOWN	nuoC
Cluster-26641.21515	0.0175	0.4025	DOWN	uncharacterized protein LOC105225852
Cluster-9094.0	0	1.5375	DOWN	DNA-directed RNA polymerases I, II, and III subunit RPABC2
Cluster-26641.11339	5.9075	23.345	DOWN	uncharacterized protein LOC100167416
Cluster-23202.0	0.2875	2.865	DOWN	LOW QUALITY PROTEIN: translationally-controlled tumor protein homolog
Cluster-39793.0	0.04	0.4225	DOWN	LOW QUALITY PROTEIN: SAFB-like transcription modulator
Cluster-26641.4280	4.3225	1.2925	UP	GATA-binding factor A-like isoform X1
Cluster-34457.0	0.0125	0.205	DOWN	LOW QUALITY PROTEIN: protein three rows
Cluster-26641.14665	33.11	7.7775	UP	mannose-P-dolichol utilization defect 1 protein homolog
Cluster-17787.0	0.095	1.585	DOWN	ribosomal protein L34-like
Cluster-26641.15344	45.255	12.6925	UP	failed axon connections
Cluster-26641.114	5.71	1.38	UP	bombyxin C-2-like
Cluster-26641.7570	2.23	2.865	DOWN	rhodopsin-like
Cluster-26641.12954	0.64	1.75	DOWN	nuclear hormone receptor E75-like isoform X2
Cluster-830.1	0.0125	0.3125	DOWN	integrator complex subunit 7
Cluster-26641.6606	0.1325	0.7325	DOWN	pickpocket protein 28-like
Cluster-26641.13631	144.65	43.0625	UP	cathepsin B-like cysteine proteinase 3 isoform X1
Cluster-26641.14283	282.515	22.57	UP	fatty acid synthase 3
Cluster-26641.23794	1.5475	2.14	DOWN	prs
Cluster-26641.14138	115.898	16.41	UP	lactase-phlorizin hydrolase-like
Cluster-26641.11567	13.775	3.3175	UP	RNA-binding protein 14
Cluster-26641.11563	13.3325	4.0875	UP	structural maintenance of chromosomes protein 3-like
Cluster-26641.15663	255.145	69.8975	UP	chromobox protein homolog 3-like
Cluster-26641.11382	14.14	19.9725	DOWN	SEC14-like protein 2 isoform X1
Cluster-24553.0	0.01	0.395	DOWN	cytochrome P450
Cluster-26641.21493	0.71	1.465	DOWN	uncharacterized protein LOC107883363
Cluster-26641.13432	168.153	45.66	UP	maltase 2
Cluster-634.2	0.025	0.38	DOWN	solute carrier family 41 member 1
Cluster-26641.22858	4.3225	1.17	UP	formin BNR1-like
Cluster-26641.22859	1.6225	0.335	UP	uncharacterized protein LOC111032869 isoform X1
Cluster-26641.4361	1.1125	0.2925	UP	uncharacterized protein LOC111032983
Cluster-26641.13660	667.827	155.947	UP	lactase-phlorizin hydrolase-like
Cluster-15916.1	0	1.0425	DOWN	uncharacterized protein Cc115
Cluster-10436.0	0.01	0.1925	DOWN	uup-A
Cluster-26641.12758	15.105	4.0325	UP	RNA binding motif protein 39
Cluster-26641.11765	3.1	0.615	UP	zinc finger protein 883-like isoform X1
Cluster-26641.15064	75.3725	21.4025	UP	D-3-phosphoglycerate dehydrogenase
Cluster-26641.12232	26.705	8.29	UP	extensin-2-like isoform X1
Cluster-26641.12231	22.4725	28.4725	DOWN	ATP-binding cassette sub-family D member 1
Cluster-26641.12230	13.3275	28.32	DOWN	ATP-binding cassette sub-family D member 1
Cluster-7188.0	264.383	46.095	UP	macrophage migration inhibitory factor-like protein
Cluster-26641.13721	10.6975	1.82	UP	uncharacterized protein LOC111041217
Cluster-26641.16002	33.4125	9.05	UP	coronin-1C
Cluster-14162.0	0	0.2325	DOWN	U3 small nucleolar RNA-associated protein 14 homolog A
Cluster-26955.1	0.2725	1.7725	DOWN	coiled-coil-helix-coiled-coil-helix domain-containing protein 10, mitochondrial
Cluster-5916.1	0.08	1.0325	DOWN	ubiquitin-conjugating enzyme E2-17 kDa
Cluster-27992.0	0.03	0.7125	DOWN	leucine carboxyl methyltransferase 1 isoform X1
Cluster-7643.0	0	0.405	DOWN	synaptobrevin homolog YKT6
Cluster-26641.17159	4.975	1.56	UP	calcium-activated potassium channel slowpoke isoform X17
Cluster-27350.0	0.075	8.44	DOWN	uncharacterized protein LOC111039904
Cluster-26641.13690	657.638	178.887	UP	protein takeout-like
Cluster-20414.0	0.0125	0.5675	DOWN	uncharacterized protein LOC100572889 isoform X1
Cluster-26641.8520	4.945	1.3625	UP	voltage-dependent L-type calcium channel subunit beta-1
Cluster-26641.20738	0.065	39.6875	DOWN	uncharacterized protein LOC111029588 isoform X2
Cluster-8931.0	0	0.555	DOWN	coiled-coil domain-containing protein 137 isoform X1
Cluster-26641.14129	858.283	1622.29	DOWN	hypothetical protein IscW_ISCW024385, partial
Cluster-26641.13345	15.5	3.3	UP	maltase A1-like
Cluster-26641.388	0.0325	0.995	DOWN	guanine nucleotide-binding protein-like 3 homolog
Cluster-26641.19019	14.735	4.4975	UP	putative H3K9 methyltransferase
Cluster-26641.13579	4.8175	6.5375	DOWN	Putative 115 kDa protein in type-1 retrotransposable element R1DM-like Protein
Cluster-26641.17845	7.655	9.8125	DOWN	ATP-binding cassette sub-family G member 4 isoform X2
Cluster-26641.12689	6.9825	1.885	UP	LOW QUALITY PROTEIN: sortilin-related receptor-like
Cluster-15656.0	0.01	0.4525	DOWN	carboxypeptidase B-like
Cluster-26641.23195	0	0.46	DOWN	kelch-like protein 17
Cluster-26597.0	0.215	0.685	DOWN	Chlorophyll a-b binding protein, chloroplastic
Cluster-26641.19811	3.5275	4.6825	DOWN	protein borderless isoform X1
Cluster-9371.1	0	0.1575	DOWN	WD repeat-containing protein 59 homolog
Cluster-23058.0	1.975	0.225	UP	uncharacterized protein LOC107884179
Cluster-23678.0	0.0575	0.425	DOWN	protein RRNAD1 isoform X1
Cluster-14332.0	0.05	0.57	DOWN	uncharacterized protein LOC103309792
Cluster-26641.4847	0.4	1.27	DOWN	ras-related and estrogen-regulated growth inhibitor isoform X1
Cluster-25775.0	0.04	0.96	DOWN	4-aminobutyrate aminotransferase, mitochondrial
Cluster-26641.4059	3.885	0.655	UP	putative uncharacterized protein DDB_G0282129
Cluster-26641.4583	0.135	1.47	DOWN	RR1 cuticle protein 1 precursor
Cluster-26641.4584	3.9525	5.7475	DOWN	glutamate receptor ionotropic, kainate 2-like
Cluster-9516.0	0	0.585	DOWN	MIT domain-containing protein 1
Cluster-26641.20751	0.15	0.51	DOWN	hypothetical protein D910_00241
Cluster-6831.0	0	0.7475	DOWN	uncharacterized protein LOC105225032
Cluster-23695.0	0.015	0.4125	DOWN	myosin heavy chain 95F
Cluster-19878.0	0.0125	0.2775	DOWN	uncharacterized protein LOC108976331
Cluster-31667.0	0.045	0.5	DOWN	glutathione synthetase isoform X1
Cluster-26641.16785	23.785	1.9775	UP	acyl-CoA Delta..11.. desaturase
Cluster-26641.885	0	0.1475	DOWN	Golgi-specific brefeldin A-resistance guanine nucleotide exchange factor 1
Cluster-26641.10834	3.9925	0.6925	UP	fatty acyl-CoA reductase 1
Cluster-26641.14200	45.8975	7.48	UP	sodium-independent sulfate anion transporter
Cluster-13565.0	0.03	0.6	DOWN	cytochrome b5
Cluster-39250.0	0.03	0.31	DOWN	splicing factor 45
Cluster-26641.15552	7.1075	9.98	DOWN	protein PRY1-like isoform X3
Cluster-26641.12520	2.5775	0.7725	UP	disintegrin and metalloproteinase domain-containing protein unc-71 isoform X2
Cluster-26641.12525	10.7975	16.1825	DOWN	basic-leucine zipper transcription factor A-like
Cluster-26641.25176	0.0125	1.4775	DOWN	vitellogenin receptor
Cluster-26641.25171	0.01	0.345	DOWN	DNA-directed RNA polymerase II subunit RPB2
Cluster-33604.0	0.01	0.3225	DOWN	evolutionarily conserved signaling intermediate in Toll pathway, mitochondrial
Cluster-29891.0	0.005	0.2775	DOWN	zinc finger protein 112-like isoform X1
Cluster-26641.6886	1.74	0.555	UP	zinc finger protein 845-like
Cluster-13822.0	0.005	0.3425	DOWN	collagen type IV alpha-3-binding protein
Cluster-26641.15329	48.765	106.917	DOWN	hypothetical protein IscW_ISCW024385, partial
Cluster-26641.1564	0.5525	1.885	DOWN	probable ATP-dependent RNA helicase DHX34
Cluster-26641.6716	28.44	4.83	UP	cathepsin B-1874 precursor
Cluster-16596.0	0.0075	0.3175	DOWN	DNA-directed RNA polymerase III subunit RPC4 isoform X1
Cluster-26641.1569	0.085	0.405	DOWN	catenin alpha
Cluster-15017.0	0.025	1.3425	DOWN	LDLR chaperone boca
Cluster-31187.0	0.165	0.68	DOWN	uncharacterized protein LOC107885485
Cluster-21536.0	0.24	3.345	DOWN	ACYPI007294
Cluster-30510.0	0.0225	0.56	DOWN	39S ribosomal protein L3, mitochondrial
Cluster-26641.13817	14.245	3.72	UP	cold shock domain-containing protein E1 isoform X4
Cluster-12825.0	0.01	0.4275	DOWN	protein FAM98A
Cluster-28998.0	0.0175	0.5125	DOWN	protein penguin
Cluster-26641.22560	1.8725	0.2075	UP	uncharacterized protein LOC111028627
Cluster-26641.12778	4.6025	7.6975	DOWN	uncharacterized protein LOC111036824
Cluster-23144.0	0.695	1.2425	DOWN	lon
Cluster-26641.4925	0.7175	8.46	DOWN	myrosinase 1-like
Cluster-16300.0	0.005	0.29	DOWN	protein arginine N-methyltransferase 5
Cluster-26641.6833	35.57	8.4025	UP	soluble calcium-activated nucleotidase 1-like isoform X2
Cluster-26641.11315	16.4575	5.1125	UP	protein slit
Cluster-26641.25922	0.705	0.1075	UP	uncharacterized protein LOC111031432
Cluster-26641.5744	1.5825	0.43	UP	UDP-glucuronosyl transferase 342A2
Cluster-30006.0	0.395	3.7525	DOWN	LOW QUALITY PROTEIN: dynein heavy chain 3, axonemal-like
Cluster-26641.7675	4.055	38.4675	DOWN	nose resistant to fluoxetine protein 6
Cluster-26641.1482	0.065	1.0225	DOWN	hypothetical protein FF38_03034
Cluster-26641.6101	7.77	0.96	UP	repressed by EFG1 protein 1-like
Cluster-26641.9109	17.2775	45.89	DOWN	pupal cuticle protein 27-like
Cluster-26641.11409	16.82	4.365	UP	B-cell lymphoma..leukemia 11B-like
Cluster-26641.15235	30.0375	6.075	UP	uncharacterized protein LOC111029575
Cluster-33394.0	0	0.5575	DOWN	synaptosomal-associated protein 25
Cluster-40348.0	0.02	0.445	DOWN	carnitine O-palmitoyltransferase 2, mitochondrial
Cluster-26080.0	0.0075	0.49	DOWN	protein ultraspiracle isoform X1
Cluster-26641.7478	15.145	2.865	UP	protein-glutamate O-methyltransferase-like
Cluster-40508.0	0.015	0.5175	DOWN	LOW QUALITY PROTEIN: protein Spindly
Cluster-26641.13606	238.555	395.16	DOWN	cuticle protein 16.5-like
Cluster-26641.7995	11.3575	2.8625	UP	zinc finger protein 271-like
Cluster-15108.0	0.01	0.3775	DOWN	probable multidrug resistance-associated protein lethal..2..03659 isoform X1
Cluster-27221.0	0.03	0.5375	DOWN	protein disulfide-isomerase TMX3
Cluster-26641.25827	1.655	2.415	DOWN	uncharacterized protein LOC100575398 isoform X1
Cluster-34231.0	0.8175	0.1175	UP	hypothetical protein PVIIG_00270, partial
Cluster-7478.0	0	0.3775	DOWN	reticulocalbin-2
Cluster-26641.25241	0.0075	0.245	DOWN	NAD-dependent histone deacetylase Sir2
Cluster-26641.760	0.105	1.0525	DOWN	cytosolic non-specific dipeptidase
Cluster-26641.765	0	0.46	DOWN	lysine--tRNA ligase isoform X2
Cluster-26641.15098	9.4375	2.8375	UP	pollen-specific leucine-rich repeat extensin-like protein 1
Cluster-26641.19914	5.9225	12.8075	DOWN	scavenger receptor class B member 1-like isoform X1
Cluster-39658.1	0	0.345	DOWN	hypothetical protein
Cluster-14504.0	0.0025	0.1925	DOWN	DNA-directed RNA polymerase I subunit RPA2
Cluster-26641.18836	0.705	1.165	DOWN	translation factor GUF1 homolog, chloroplastic-like
Cluster-26641.16016	14.4325	21.11	DOWN	aconitate hydratase 2
Cluster-26641.4159	4.2775	0.9425	UP	lysine-specific demethylase 4A-like
Cluster-26641.21115	3.26	5.0825	DOWN	uncharacterized protein LOC100571853
Cluster-26641.21116	7.49	10.5225	DOWN	proton-coupled folate transporter-like
Cluster-37056.0	0.25	0.75	DOWN	mnmE
Cluster-26641.9420	1.795	0.2675	UP	gamma-aminobutyric acid receptor subunit beta-like isoform X1
Cluster-26641.20646	7.505	2.055	UP	beta-1,4-N-acetylgalactosaminyltransferase bre-4
Cluster-26641.13199	1428.68	261.752	UP	fatty acid synthase-like
Cluster-28683.0	0.065	1.23	DOWN	COP9 signalosome complex subunit 7
Cluster-26641.8429	5.6525	1.2375	UP	multiple inositol polyphosphate phosphatase 1-like isoform X1
Cluster-26641.8426	81.43	235.035	DOWN	hypothetical protein
Cluster-26641.8427	27.91	60.385	DOWN	regulator of G-protein signaling 17 isoform X1
Cluster-25999.0	0.0225	0.31	DOWN	death-associated inhibitor of apoptosis 2
Cluster-26641.1260	0.0075	0.2925	DOWN	metal transporter CNNM4
Cluster-26641.12850	3166.86	891.735	UP	heat shock 70 kDa protein cognate 4
Cluster-26641.5353	3.7275	22.405	DOWN	cuticle protein 63-like isoform X2
Cluster-26641.5879	7.2225	1.6925	UP	zinc finger protein jing
Cluster-26641.5876	0.8375	0.2125	UP	uncharacterized protein LOC101236901
Cluster-26641.17579	8.195	2.1675	UP	voltage-dependent calcium channel subunit alpha-2..delta-3 isoform X3
Cluster-26641.13890	19.4475	36.0525	DOWN	obscurin-like isoform X6
Cluster-26641.13894	0.1125	0.315	DOWN	amtB
Cluster-26641.13897	9.62	2.665	UP	CTD small phosphatase-like protein
Cluster-24490.0	0.1325	1.9175	DOWN	eukaryotic translation initiation factor 3 subunit M
Cluster-26641.11139	38.2325	6.27	UP	cytochrome b561
Cluster-26641.2513	0.2125	1.08	DOWN	putative nuclease HARBI1
Cluster-26641.2514	0.2	3.0425	DOWN	probable medium-chain specific acyl-CoA dehydrogenase, mitochondrial isoform X2
Cluster-37234.0	0.2525	4.85	DOWN	transmembrane emp24 domain-containing protein bai
Cluster-26641.11867	52.9525	6.7325	UP	ACYPI000010
Cluster-15761.0	0.0025	0.245	DOWN	mucin-4 isoform X1
Cluster-26641.511	9.67	0.0875	UP	hydroxysteroid dehydrogenase-like protein 2
Cluster-8229.0	0	0.395	DOWN	mitochondrial ribosome-associated GTPase 2
Cluster-9315.0	0	0.1875	DOWN	protein HIRA homolog
Cluster-9131.0	0	0.2375	DOWN	vacuolar protein sorting-associated protein 33A
Cluster-26641.24707	0.8525	0.1575	UP	fork head domain-containing protein crocodile-like
Cluster-26641.20087	1.17	1.495	DOWN	lachesin-like
Cluster-26641.20089	5.745	1.6775	UP	kinesin-like protein KIF18A isoform X2
Cluster-26641.4553	0.6525	1.425	DOWN	cullin-2
Cluster-26641.5439	0.96	1.9875	DOWN	oprF
Cluster-30453.0	0.0075	0.455	DOWN	uncharacterized protein LOC105228899
Cluster-26641.7360	11.6875	1.53	UP	delta..24..-sterol reductase-like isoform X1
Cluster-26641.10208	372.88	22.66	UP	uncharacterized protein LOC100168737
Cluster-26641.3298	1.755	0.4175	UP	nicotinic acetylcholine receptor alpha 7-2 subunit
Cluster-26641.5984	5.455	1.3175	UP	peptide transporter family 1 isoform X5
Cluster-26641.5982	5.3325	7.0875	DOWN	platelet-activating factor acetylhydrolase-like
Cluster-26641.9187	5.8725	1.1875	UP	homeobox protein OTX1 isoform X1
Cluster-26641.2458	3.7925	8.0675	DOWN	cuticle protein 1
Cluster-26641.2988	2.0625	0.2425	UP	uncharacterized protein LOC111026863 isoform X1
Cluster-17090.0	0.005	0.2225	DOWN	phosphatidylinositol 4,5-bisphosphate 3-kinase catalytic subunit delta isoform
Cluster-26641.3350	0.0075	0.1725	DOWN	rho GTPase-activating protein 26 isoform X1
Cluster-26641.13229	10.3375	25.0725	DOWN	hypothetical protein CRE_03576
Cluster-26641.9045	35.41	9.42	UP	glutathione S-transferase-like
Cluster-26641.16542	5.845	1.665	UP	protein trachealess isoform X2
Cluster-26641.12577	20.42	26.41	DOWN	RING finger protein nhl-1 isoform X3
Cluster-26641.19511	12.835	3.73	UP	protein Malvolio isoform X1
Cluster-26641.15179	29.775	5.7775	UP	macrophage migration inhibitory factor-like
Cluster-13719.0	0.005	0.1025	DOWN	uncharacterized protein LOC105224223
Cluster-20225.0	0.0475	0.4875	DOWN	probable cytochrome P450 6a13
Cluster-35511.0	0.14	0.4625	DOWN	30S ribosomal protein S1-like
Cluster-26641.48	0.425	0.055	UP	uncharacterized protein LOC107163065
Cluster-26641.10876	0.9175	3.4975	DOWN	ring canal kelch homolog
Cluster-26641.6343	7.46	0.0625	UP	endothelin-converting enzyme homolog
Cluster-41105.1	0.06	1.61	DOWN	glucosidase 2 subunit beta
Cluster-32190.0	0.2175	3.95	DOWN	histidine triad nucleotide-binding protein 1
Cluster-7843.0	0	0.95	DOWN	thioredoxin domain-containing protein 17 isoform X1
Cluster-36138.0	0.0925	0.43	DOWN	UDP-glucuronosyltransferase 2B15 isoform X3
Cluster-26641.3701	6.7975	8.6725	DOWN	inositol polyphosphate 1-phosphatase
Cluster-26641.3708	2.48	0.3875	UP	predicted protein, partial
Cluster-26641.16480	43.8025	6.605	UP	maltase 2
Cluster-26641.12908	9.1475	2.065	UP	espin-like
Cluster-26641.6663	5.52	82.2	DOWN	troponin C, isoform 1-like isoform X2
Cluster-17233.0	0	0.61	DOWN	elongation factor 1-alpha, partial
Cluster-26641.15327	124.433	183.265	DOWN	unnamed protein product
Cluster-26641.16735	2.955	4.82	DOWN	chromatin assembly factor 1 subunit A-like
Cluster-26641.1390	0	0.21	DOWN	FAS-associated factor 1
Cluster-26641.12969	355.188	526.785	DOWN	hypothetical protein BV898_19775
Cluster-26641.12313	3.66	0.3625	UP	multidrug resistance-associated protein 4 isoform X2
Cluster-37849.0	0.0975	0.755	DOWN	cytochrome P450 4C1-like
Cluster-26641.22415	5.775	0.2175	UP	uncharacterized protein LOC111033335
Cluster-8858.0	0	0.195	DOWN	neurobeachin isoform X8
Cluster-26641.21194	1.2525	4.4775	DOWN	uncharacterized protein LOC100163122 isoform X1
Cluster-32660.0	0.1125	0.4475	DOWN	uncharacterized protein LOC111026444
Cluster-26641.24013	0.38	0.92	DOWN	uncharacterized protein LOC111037460
Cluster-26641.3393	0.4	1.0775	DOWN	uncharacterized protein y4qI-like
Cluster-26641.7525	25.21	6.3025	UP	annexin B11-like
Cluster-31518.0	0.405	0.725	DOWN	rpsF
Cluster-26641.6064	5.9575	34.62	DOWN	uncharacterized protein LOC111034998
Cluster-26641.16332	3.695	5.625	DOWN	WD repeat-containing protein 47 isoform X4
Cluster-26641.17060	6.0975	0.2675	UP	legumain
Cluster-26641.4354	21.0625	3.225	UP	uncharacterized protein LOC111036714
Cluster-26641.4355	16.1225	20.43	DOWN	cAMP-responsive element-binding protein-like 2
Cluster-26641.1805	0.19	1.195	DOWN	glutamate dehydrogenase, mitochondrial isoform X2
Cluster-26641.1806	0.04	0.37	DOWN	guanine nucleotide-binding protein subunit beta-1
Cluster-26641.10590	36.9875	4.38	UP	myrosinase 1-like
Cluster-4729.2	0.0025	0.2075	DOWN	uncharacterized protein DDB_G0288805
Cluster-26641.2735	0.4375	0.8925	DOWN	uncharacterized protein LOC111678682
Cluster-26641.14743	110.398	16.025	UP	macrophage migration inhibitory factor-like
Cluster-26641.11713	46.81	157.585	DOWN	GPI-anchored CFEM domain protein A-like
Cluster-26641.25526	0	0.9525	DOWN	uncharacterized protein LOC105229677
Cluster-26641.18619	14.9425	23.5475	DOWN	uncharacterized protein LOC111061743
Cluster-26641.2839	2.1425	4.335	DOWN	cuticle protein 19-like
Cluster-26641.6424	6.4225	0.4975	UP	acetyl-coenzyme A transporter 1-like
Cluster-24854.0	0.0525	0.7925	DOWN	exportin-2
Cluster-26641.13381	218.98	678.895	DOWN	uncharacterized protein LOC111042914
Cluster-26641.4740	0.17	1.7675	DOWN	pyrimidodiazepine synthase-like
Cluster-26641.9629	24.1025	31.2725	DOWN	IDLSRF-like peptide
Cluster-24756.0	0.005	0.1275	DOWN	myb-like protein Q isoform X1
Cluster-26641.1101	0.005	0.1825	DOWN	zinc finger protein 37
Cluster-9096.0	0	0.14	DOWN	LOW QUALITY PROTEIN: uncharacterized protein LOC105222946
Cluster-26641.17633	39.8725	74.185	DOWN	cuticle protein 16.5-like
Cluster-34233.0	2.875	0.51	UP	UDP-glucuronosyltransferase 2C1-like
Cluster-26641.15287	5.145	9.5	DOWN	uncharacterized protein LOC111030207
Cluster-26641.18861	12.815	17.445	DOWN	Ig-like and fibronectin type-III domain-containing protein 1
Cluster-26641.15727	38.4225	11.81	UP	synaptic vesicle membrane protein VAT-1 homolog-like
Cluster-26641.13506	16.2575	21.5525	DOWN	regulating synaptic membrane exocytosis protein 2 isoform X4
Cluster-26641.13507	127.608	196.7	DOWN	cytochrome c oxidase protein 20 homolog
Cluster-26641.13505	223.755	14.625	UP	skin secretory protein xP2-like
Cluster-26641.20210	9.4025	0.7975	UP	thiamine transporter 1
Cluster-24267.0	0.0025	0.1025	DOWN	LOW QUALITY PROTEIN: protein dopey-1 homolog
Cluster-30525.0	0.1575	4.8375	DOWN	LYR motif-containing protein 5
Cluster-26336.0	1.215	2.0275	DOWN	uncharacterized protein LOC100575196
Cluster-26641.4796	1.4325	2.195	DOWN	uncharacterized protein LOC111030440
Cluster-26641.13238	15.86	24.25	DOWN	coiled-coil domain-containing protein R3HCC1L isoform X2
Cluster-26641.7201	7.2025	25.585	DOWN	lipase 3-like
Cluster-26641.21607	2.7875	3.5525	DOWN	uncharacterized protein LOC111039662
Cluster-34493.0	0.175	3.3525	DOWN	survival motor neuron protein
Cluster-26641.3009	13.205	2.9525	UP	fatty acid synthase-like
Cluster-26641.2660	0.0075	0.1675	DOWN	LOW QUALITY PROTEIN: uncharacterized protein LOC105231327
Cluster-16809.0	0.025	0.355	DOWN	zinc finger RNA-binding protein 2
Cluster-26641.1318	0.025	0.375	DOWN	transport and Golgi organization protein 1
Cluster-26641.1311	0.09	0.8	DOWN	uridine 5'-monophosphate synthase
Cluster-40361.0	0	3.0925	DOWN	major facilitator superfamily domain-containing protein 6-like protein B isoform X1
Cluster-9809.0	0	0.25	DOWN	protein rogdi
Cluster-26641.851	0.0875	1.0725	DOWN	rho GDP-dissociation inhibitor 1
Cluster-26641.17404	11.1925	1.6025	UP	tigger transposable element-derived protein 6-like
Cluster-26641.14186	5.1025	10.4925	DOWN	prisilkin-39-like
Cluster-26641.14188	467.26	105.547	UP	protein takeout-like
Cluster-7765.0	0	0.29	DOWN	N-acetyltransferase 6
Cluster-26641.19256	3.725	5.755	DOWN	amine sulfotransferase-like
Cluster-26641.20580	1.34	4.045	DOWN	uncharacterized protein LOC111039926
Cluster-26641.15636	10.7225	3.19	UP	nucleolysin TIAR isoform X1
Cluster-26641.15638	60.9825	101.818	DOWN	RING finger protein nhl-1 isoform X3
Cluster-26641.16636	7.265	1.3575	UP	transcription factor Sox-2-like
Cluster-39249.0	1.415	2.1425	DOWN	thiamine transporter 2-like isoform X1
Cluster-26641.13338	0.495	0.855	DOWN	AGAP009623-PA-like protein
Cluster-26641.23849	0.0875	1.215	DOWN	uncharacterized protein LOC100166601 precursor
Cluster-34844.0	0.01	0.4025	DOWN	synaptic vesicle glycoprotein 2A
Cluster-15976.0	0.0025	0.1625	DOWN	SCY1-like protein 2
Cluster-26641.5089	3.125	7.2575	DOWN	fatty acyl-CoA reductase wat-like
Cluster-26641.3668	0.1025	1.575	DOWN	peflin isoform X1
Cluster-26641.10517	12.6175	0.555	UP	gamma-glutamyltranspeptidase 1-like
Cluster-26641.5503	0	110.995	DOWN	hypothetical protein A3Q56_05216, partial
Cluster-15901.0	0.005	0.2475	DOWN	solute carrier family 25 member 44
Cluster-26641.16936	3.525	0.8325	UP	uncharacterized protein LOC100572033
Cluster-26641.1538	0.015	0.855	DOWN	elongator complex protein 5
Cluster-26641.15036	1110.27	306.413	UP	calphotin-like
Cluster-26641.15037	777.395	1170.94	DOWN	uncharacterized protein LOC107165607
Cluster-26641.15039	406.923	527.892	DOWN	uncharacterized protein LOC107165607
Cluster-26641.12264	12.9375	3.42	UP	uncharacterized protein LOC111038715
Cluster-26641.17304	2.7575	5.835	DOWN	UNKNOWN
Cluster-26641.17303	19.8475	44.8275	DOWN	Uncharacterized protein APZ42_003968
Cluster-26641.11459	7.7825	11.34	DOWN	RNA-directed DNA polymerase from mobile element jockey-like
Cluster-26641.23390	2.06	0.4825	UP	hydroxymethylglutaryl-CoA synthase 2-like
Cluster-26641.14023	2836.99	124.897	UP	uncharacterized protein LOC100570877
Cluster-26641.15777	27.9975	40.2	DOWN	pro-resilin-like
Cluster-26641.19420	28.91	56.575	DOWN	glucose dehydrogenase
Cluster-38722.0	0.9125	1.6625	DOWN	RING finger protein 141-like
Cluster-26641.12623	0.0625	0.945	DOWN	heat shock protein 90, partial
Cluster-29440.0	0.025	0.8775	DOWN	L-galactose dehydrogenase-like isoform X1
Cluster-26641.6231	4.735	8.3375	DOWN	A disintegrin and metalloproteinase with thrombospondin motifs 18 isoform X1
Cluster-26641.5529	0.3825	5.025	DOWN	serine protease snake-like
Cluster-37521.0	0	0.205	DOWN	Tudor
Cluster-26641.8461	5.3875	1.4975	UP	plexin A3-like
Cluster-26641.7012	14.9725	20.485	DOWN	probable medium-chain specific acyl-CoA dehydrogenase, mitochondrial
Cluster-26641.7016	3.5575	0.475	UP	glyoxylate reductase..hydroxypyruvate reductase-like
Cluster-39330.1	0.305	0.7775	DOWN	hypothetical protein D910_00694, partial
Cluster-26641.13577	515.237	68.205	UP	uncharacterized protein LOC111036037
Cluster-26641.9158	1.6575	4.89	DOWN	MORN repeat-containing protein 4
Cluster-26641.11454	0.8075	0.11	UP	general transcription factor II-I repeat domain-containing protein 2-like
Cluster-26641.8821	1.0175	6.7875	DOWN	uncharacterized protein LOC105558450
Cluster-26641.1706	4.495	6.79	DOWN	glycine receptor subunit alpha-4-like isoform X1
Cluster-14642.0	0.005	0.1775	DOWN	25S rRNA ..cytosine-C..5....-methyltransferase nop2
Cluster-26641.2979	7.1625	0.645	UP	ACYPI005907
Cluster-25844.0	1.7875	0.4975	UP	major royal jelly protein 1-like
Cluster-26641.20836	0	96.675	DOWN	hypothetical protein A3Q56_05216, partial
Cluster-26641.20837	1941.34	8796.32	DOWN	hypothetical protein A3Q56_05216, partial
Cluster-36188.0	0.5975	1.59	DOWN	uncharacterized protein LOC107884038
Cluster-26641.9830	4.245	0.9825	UP	protein sidekick isoform X4
Cluster-26641.14612	49.1525	97.2325	DOWN	hypothetical protein TTRE_0000975501
Cluster-26641.14611	75.3325	164.358	DOWN	LOW QUALITY PROTEIN: uncharacterized protein LOC108664000
Cluster-26641.11791	2.6725	0.3375	UP	uncharacterized transporter YwbF-like isoform X1
Cluster-26641.7428	13.4525	4	UP	cuticle protein 21-like
Cluster-26641.5139	0.865	1.7275	DOWN	uncharacterized protein LOC100159492 isoform X2
Cluster-26641.16423	7.625	0.9725	UP	ACYPI004943
Cluster-26641.10865	25.6975	33.32	DOWN	mariner mos1 transposase
Cluster-33016.0	0.0575	0.7925	DOWN	apoptosis-inducing factor 3-like isoform X3
Cluster-26641.10139	5.02	9.28	DOWN	alpha-crystallin B chain isoform X1
Cluster-26641.10131	2.2675	4.005	DOWN	paramyosin, long form
Cluster-14220.0	0.0225	0.2625	DOWN	nose resistant to fluoxetine protein 6-like
Cluster-26641.15500	10.86	2.635	UP	maternal protein pumilio
Cluster-3979.1	0.03	0.6875	DOWN	major antigen isoform X2
Cluster-26641.18045	23.2325	42.845	DOWN	neprilysin-11-like isoform X2
Cluster-26641.12393	7.5025	14.3725	DOWN	adhesive plaque matrix protein-like
Cluster-26641.17812	2.2375	6.0425	DOWN	alpha-tocopherol transfer protein-like
Cluster-26641.18094	8.315	2.4475	UP	neogenin isoform X3
Cluster-26641.20315	4.5275	1.405	UP	thiamine transporter 2-like
Cluster-36718.0	0.345	0.8075	DOWN	mreB
Cluster-26641.19339	6.6925	9.575	DOWN	Uncharacterized protein APZ42_003968
Cluster-15955.0	0.0075	0.1925	DOWN	uncharacterized protein LOC105222257 isoform X1
Cluster-15533.0	0.0025	0.1275	DOWN	eukaryotic translation initiation factor 2-alpha kinase
Cluster-23848.0	0.015	0.3975	DOWN	group XV phospholipase A2-like
Cluster-26641.4182	2.29	4.5775	DOWN	odorant-binding protein BP10
Cluster-16864.0	0.0075	0.285	DOWN	calcium..calmodulin-dependent protein kinase kinase 2 isoform X1
Cluster-26641.21168	1.215	0.225	UP	octopamine receptor beta-2R-like
Cluster-41095.0	0.085	0.3425	DOWN	THAP domain-containing protein 1-like
Cluster-26641.3322	5.0025	0.6025	UP	tip elongation aberrant protein 1
Cluster-26641.14925	463.275	78.675	UP	fatty acid synthase-like
Cluster-7153.0	0	0.23	DOWN	ikaros family zinc finger protein isoform X3
Cluster-26641.8470	20.665	4.0725	UP	aminopeptidase N 1
Cluster-26641.8478	2.145	0.625	UP	acetyl-coenzyme A transporter 1
Cluster-30183.0	0.075	0.59	DOWN	mdh
Cluster-26641.12804	1641.46	168.947	UP	TPA_inf: cathepsin B
Cluster-26641.1214	0.01	0.185	DOWN	hypothetical protein FF38_09753
Cluster-26641.1212	0	0.1375	DOWN	ATP-binding cassette transporter G subfamily member 1
Cluster-26641.17389	12.44	17.2025	DOWN	homeodomain-only protein-like
Cluster-26641.953	0.06	1.0725	DOWN	GMP synthase
Cluster-26641.955	0	0.36	DOWN	endophilin-A
Cluster-26641.13861	101.805	184.675	DOWN	adhesive plaque matrix protein
Cluster-26641.13869	10.385	13.7675	DOWN	Down syndrome cell adhesion molecule-like protein Dscam2 isoform X1
Cluster-26641.18881	275.277	678.478	DOWN	cuticle protein 19.8-like
Cluster-39350.0	0.0125	0.4425	DOWN	failed axon connections isoform X2
Cluster-26641.25068	3.065	0.27	UP	endothelin-converting enzyme homolog
Cluster-26641.548	0.895	1.19	DOWN	uncharacterized protein LOC100568712
Cluster-7314.0	0	0.2175	DOWN	spermine oxidase-like
Cluster-27007.0	2.43	5.38	DOWN	chloroplast ribulose-1,5-bisphosphate carboxylase..oxygenase small subunit 2
Cluster-26652.0	0.015	0.415	DOWN	microtubule-associated protein Jupiter isoform X7
Cluster-40474.0	0.015	0.2375	DOWN	coatomer subunit gamma
Cluster-31137.0	0.1275	0.305	DOWN	insF, partial
Cluster-26641.22908	0.8575	1.2475	DOWN	protein msta-like
Cluster-26641.22909	2.3725	0.5125	UP	facilitated trehalose transporter Tret1-like
Cluster-13360.0	0.0075	0.3225	DOWN	transcription factor grauzone
Cluster-26641.2127	0	0.6175	DOWN	uncharacterized protein LOC100167607 precursor
Cluster-26641.5799	5.8425	10.5725	DOWN	probable ATP-dependent RNA helicase DHX34
Cluster-8256.0	0	0.0875	DOWN	homeobox protein 5
Cluster-26641.14049	7.065	9.98	DOWN	Down syndrome cell adhesion molecule-like protein Dscam2
Cluster-22706.0	0.015	0.2225	DOWN	P protein isoform X2
Cluster-26641.1780	3.895	1.19	UP	ACYPI003344
Cluster-26641.16425	1.7275	2.5675	DOWN	mucin-2-like
Cluster-26641.8208	5.4475	11.755	DOWN	MPA13 allergen-like
Cluster-8608.0	0	0.265	DOWN	putative methyltransferase C9orf114
Cluster-26641.10992	0.07	0.7425	DOWN	CLUMA_CG006906, isoform E
Cluster-26641.10994	26.99	41.0675	DOWN	calbindin-32
Cluster-26641.14690	18.44	23.8625	DOWN	neuroligin-1-like
Cluster-26641.21359	2.625	5.9025	DOWN	mfd
Cluster-26641.21352	1.0525	0.1725	UP	uncharacterized protein LOC111026661
Cluster-26641.21353	0.52	0.1025	UP	tubulin glycylase 3A-like
Cluster-26641.20408	4.845	1.245	UP	UDP-glucuronosyl transferase 344D4
Cluster-39491.0	0.0275	1.0425	DOWN	uncharacterized protein LOC105234007
Cluster-18526.0	0.165	6.07	DOWN	ACYPI005604
Cluster-9846.0	0	0.0975	DOWN	uncharacterized protein LOC105228979
Cluster-26641.4260	11.225	3.5125	UP	wee1-like protein kinase 1-B
Cluster-26641.17777	3.1125	0.7275	UP	uncharacterized protein LOC111039736
Cluster-26641.10200	7.9125	2.3025	UP	lysosomal acid phosphatase-like
Cluster-26641.5618	1.65	431.74	DOWN	IP15837p
Cluster-26641.7106	23.7175	7.31	UP	cuticle protein 19-like
Cluster-40089.0	0.0175	0.5575	DOWN	grpE protein homolog, mitochondrial
Cluster-26641.17460	9.69	36.2	DOWN	Retrovirus-related Pol polyprotein from transposon 412-like Protein
Cluster-33902.0	0.015	0.3075	DOWN	uncharacterized protein Dwil_GK12540
Cluster-38083.0	0.005	0.2125	DOWN	ribosome biogenesis protein BMS1 homolog
Cluster-26641.15328	0.7275	2.4825	DOWN	hypothetical protein IscW_ISCW024385
Cluster-26641.14429	15.5625	21.78	DOWN	RING finger protein nhl-1 isoform X1
Cluster-26641.18016	7.32	9.97	DOWN	transmembrane protease serine 9-like
Cluster-26641.18011	5.88	1.73	UP	cell division cycle protein 27 homolog
Cluster-26641.16837	17.4525	26.9975	DOWN	fatty acyl-CoA reductase 1-like
Cluster-26641.19059	1.735	2.1575	DOWN	uncharacterized protein LOC111035024
Cluster-26641.18055	2.7425	0.39	UP	UDP-glucuronosyl transferase 344L2
Cluster-26641.23482	0	0.51	DOWN	protein lethal..2..essential for life
Cluster-40499.2	0.0075	0.2675	DOWN	vitellogenin-A2
Cluster-26641.14154	237.53	425.73	DOWN	hypothetical protein TTRE_0000953901
Cluster-26641.11504	52.1975	75.785	DOWN	glycine-rich cell wall structural protein 1.0-like isoform X2
Cluster-26641.1675	1.9575	2.92	DOWN	LOW QUALITY PROTEIN: vascular endothelial growth factor A-like
Cluster-29300.0	0.005	0.23	DOWN	uncharacterized protein LOC105230848
Cluster-26641.3513	0.4375	0.9925	DOWN	putative uncharacterized protein FLJ37770
Cluster-26641.24029	0.035	0.465	DOWN	zinc finger protein 605 isoform X1
Cluster-26641.3458	1.7125	3.2325	DOWN	uncharacterized protein LOC111034754 isoform X4
Cluster-26641.3453	2.8025	0.8625	UP	alpha-1,6-mannosyl-glycoprotein 2-beta-N-acetylglucosaminyltransferase isoform X2
Cluster-26641.20613	0.3525	1.065	DOWN	uncharacterized protein LOC111026611
Cluster-26641.3256	0.0525	0.4875	DOWN	uncharacterized protein LOC108966469 isoform X2
Cluster-26641.26310	0.1125	0.3975	DOWN	uncharacterized protein LOC100169243
Cluster-40204.0	0.025	0.375	DOWN	spectrin alpha chain isoform X2
Cluster-26641.9973	0.3675	0.61	DOWN	uncharacterized protein LOC111026541
Cluster-26641.2097	1.225	1.5575	DOWN	uncharacterized protein LOC107885824, partial
Cluster-32226.0	0.1075	1.75	DOWN	translocator protein
Cluster-13603.0	0.0075	0.2525	DOWN	trimethylguanosine synthase
Cluster-14855.1	0.01	0.2375	DOWN	LOW QUALITY PROTEIN: midasin
Cluster-26641.12433	12.355	3.0475	UP	nicotinic acetylcholine receptor subunit alpha 7 subunit
Cluster-26641.12432	0.3575	4.1275	DOWN	ACYPI000071
Cluster-26641.12435	3.2775	5.7275	DOWN	prostatic acid phosphatase-like isoform X1
Cluster-37798.0	0.0975	0.9475	DOWN	uncharacterized protein LOC111028068
Cluster-26641.8605	4.0125	0.53	UP	elongation of very long chain fatty acids protein 4-like
Cluster-26641.19157	0.95	1.36	DOWN	uncharacterized protein LOC111036455
Cluster-9318.0	0	0.23	DOWN	uncharacterized protein LOC105222539
Cluster-26641.5469	0.1525	0.315	DOWN	zinc finger protein 395-like isoform X1
Cluster-26641.25164	0.0025	0.505	DOWN	importin beta-2
Cluster-7449.0	0	0.2075	DOWN	exosome complex exonuclease RRP44
Note: Only the differentially expressed unigenes with a NR annotation was listed in this table.
